# Supplementary material for: Tales of 1,008 small molecules: phenomic profiling through live-cell imaging in a panel of reporter cell lines
Source: PubMed Central journal article supplement (PMC7411054; doi:10.1038/s41598-020-69354-8), 2020-08-06

# Tales of 1,008 Small Molecules: Phenomic Profiling through Live-cell Imaging in a Panel of Reporter Cell Lines

Michael J. Cox<sup>#,1</sup>, Steffen Jaensch<sup>#,1,\*</sup>, Jelle Van de Waeter<sup>1</sup>, Laure Cougnaud<sup>2</sup>, Daan Seynaeve<sup>2</sup>, Soulayman Benalla<sup>1</sup>, Seong Joo Koo<sup>1</sup>, Ilse Van Den Wyngaert<sup>1</sup>, Jean-Marc Neefs<sup>1</sup>, Dmitry Malkov<sup>3</sup>, Mart Bittremieux<sup>1</sup>, Margino Steemans<sup>1</sup>, Pieter J. Peeters<sup>1</sup>, Jörg Kurt Wegner<sup>1</sup>, Hugo Ceulemans<sup>1</sup>, Emmanuel Gustin<sup>1</sup>, Yolanda T. Chong<sup>1,4</sup>, and Hinrich W.H. Göhlmann<sup>1</sup>

<sup>#</sup> Co-first authors

<sup>1</sup> Janssen Pharmaceutica N.V., Beerse, Belgium

<sup>2</sup> Open Analytics N.V., Antwerpen, Belgium

<sup>3</sup> MilliporeSigma, Saint Louis, MO, USA

<sup>4</sup> Present address: Recursion, Salt Lake City, UT, USA

\* Corresponding author: Steffen Jaensch, Janssen Pharmaceutica N.V., Turnhoutseweg 30, 2340 Beerse, Belgium, SJAENSCH@its.jnj.com

## Supplementary Figure S6

t-SNE maps for each of the 15 cell lines, analogously to Fig. 3 in the main manuscript. This figure was created in R version 3.6.1 (<https://www.R-project.org/>) using the ggplot2 package version 3.2.1 (<https://ggplot2.tidyverse.org/>).

# A549-ACTB-RAB5A

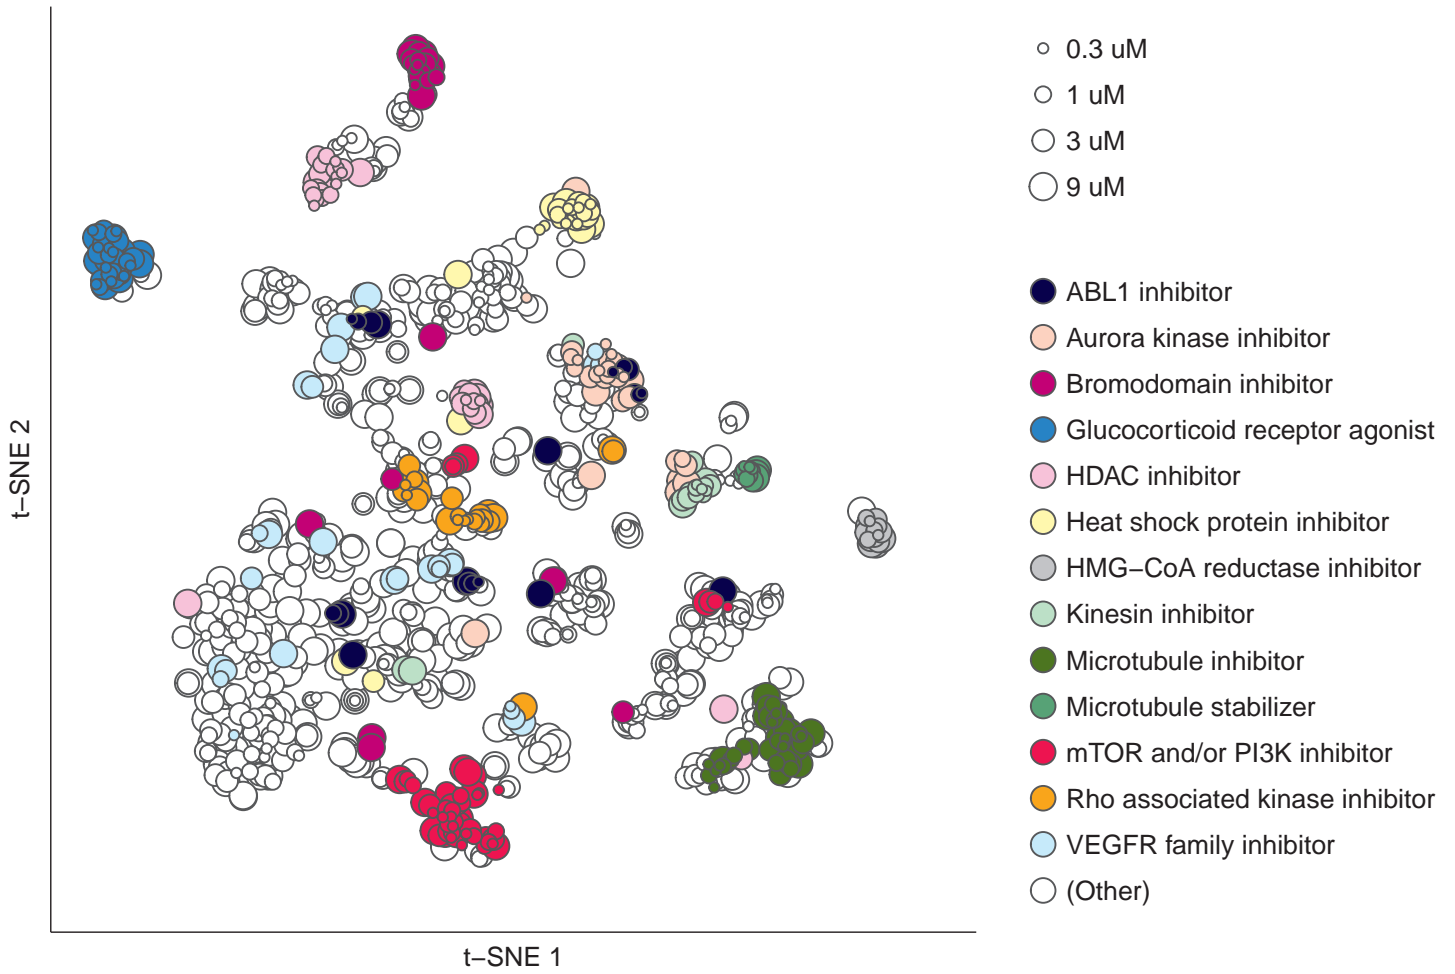

# A549-CANX-COX411

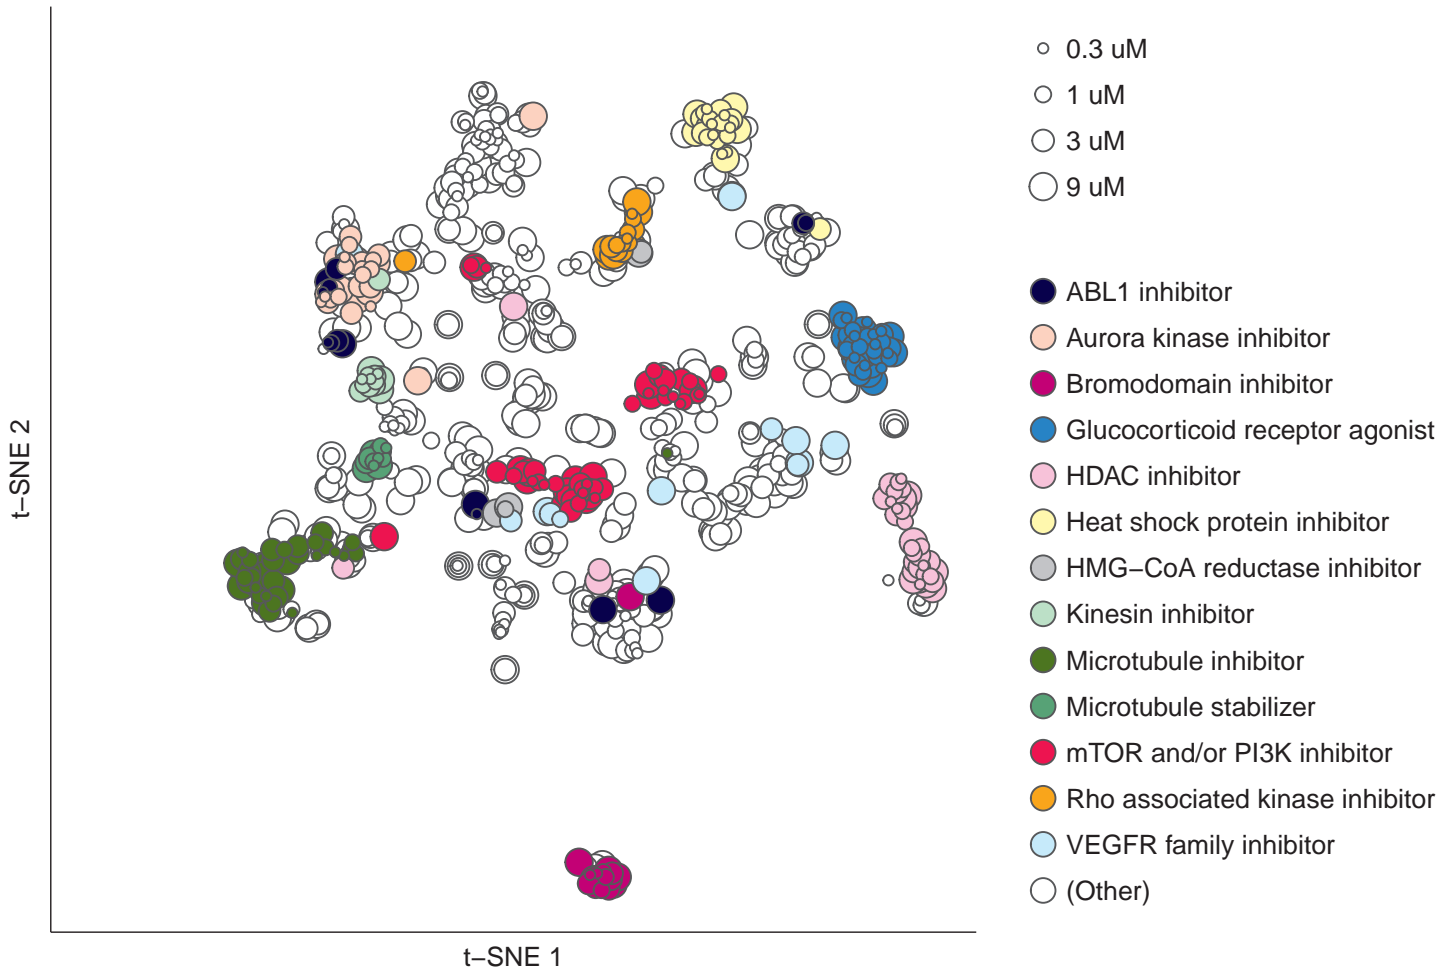

A549-GM130-SQSTM1

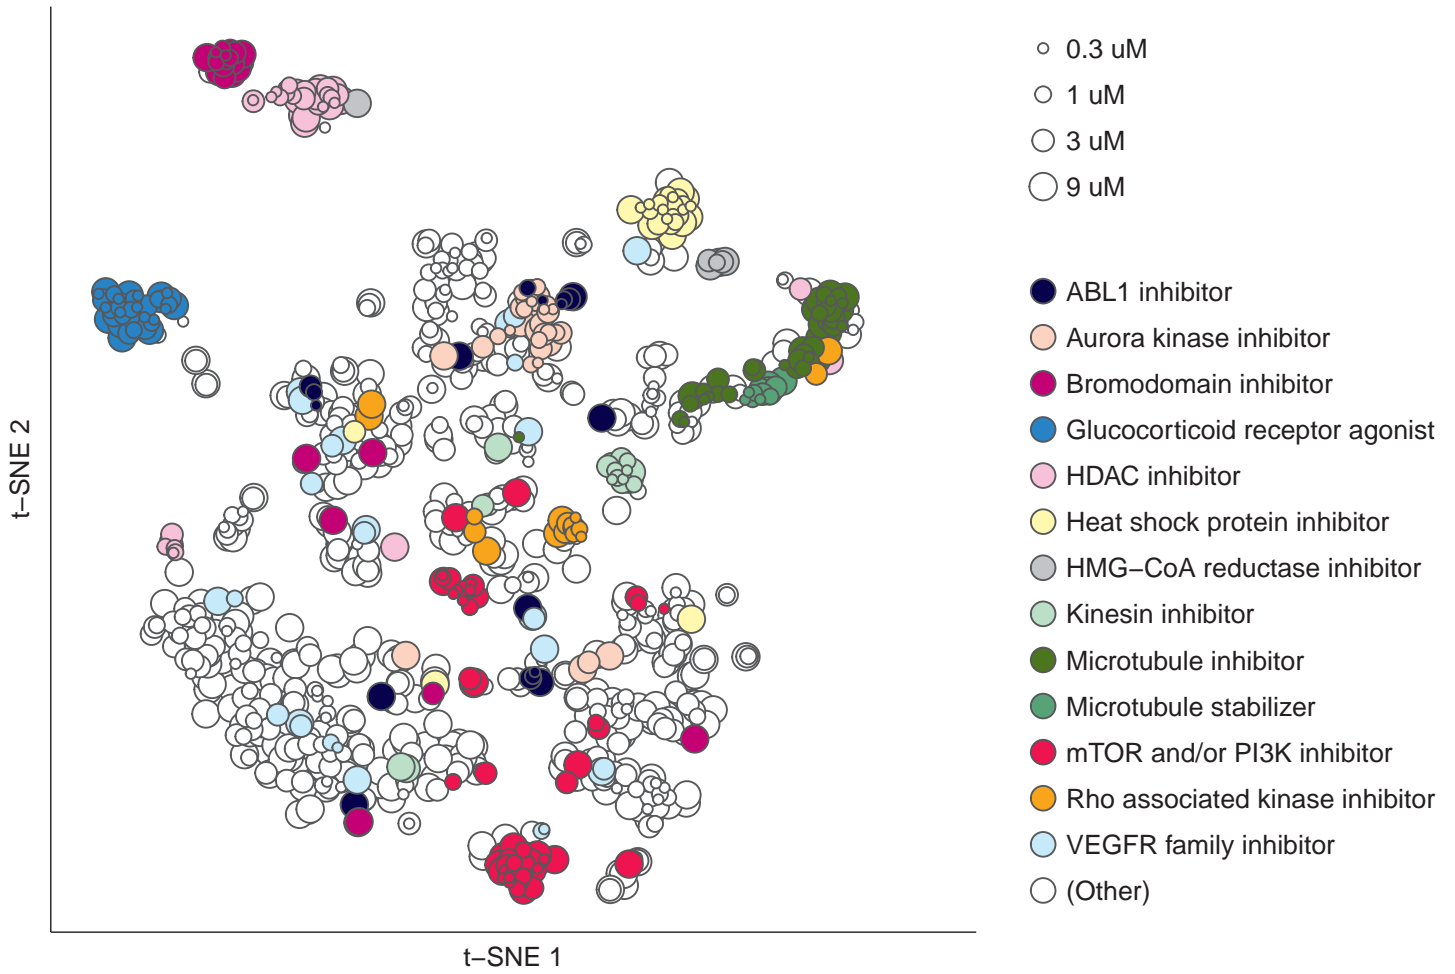

# A549-TP53BP1-CLTA

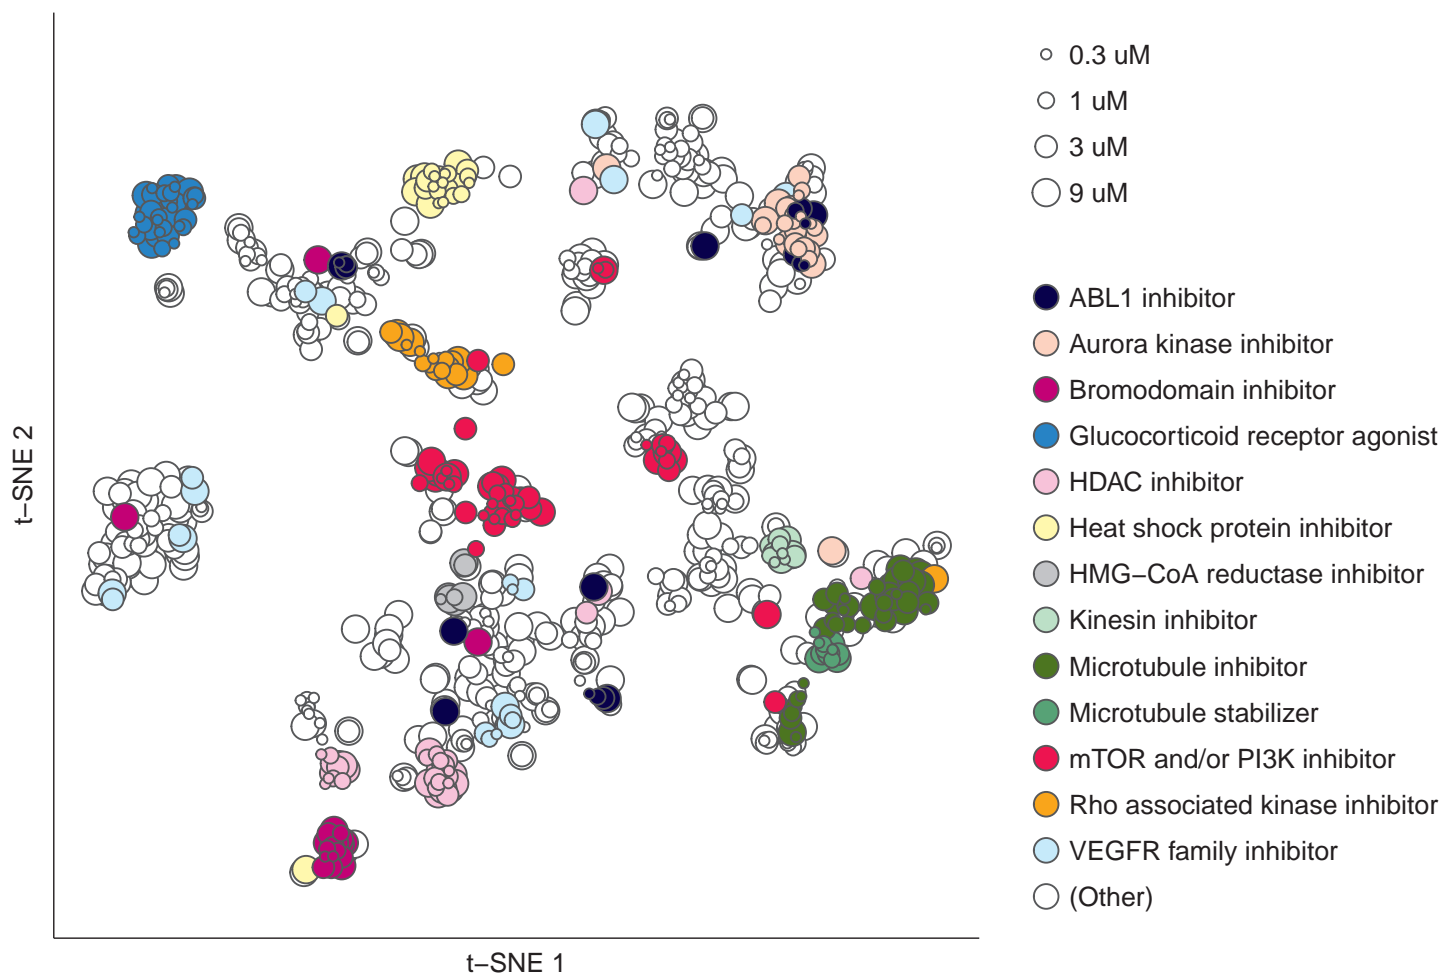

# A549-TUBA1B-RELA

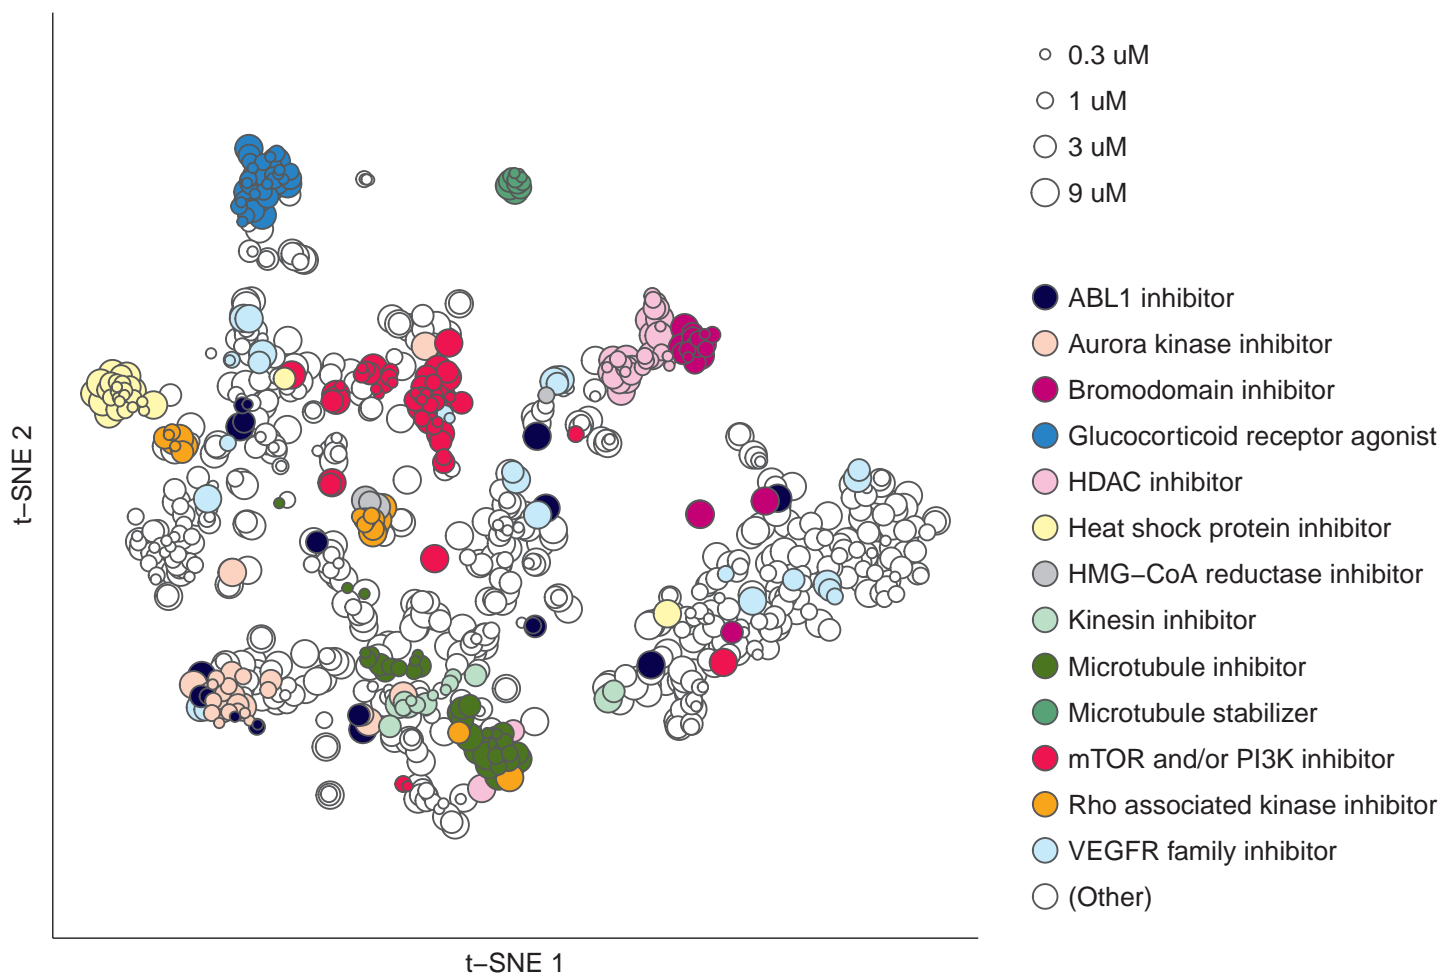

# HepG2-ACTB-RAB5A

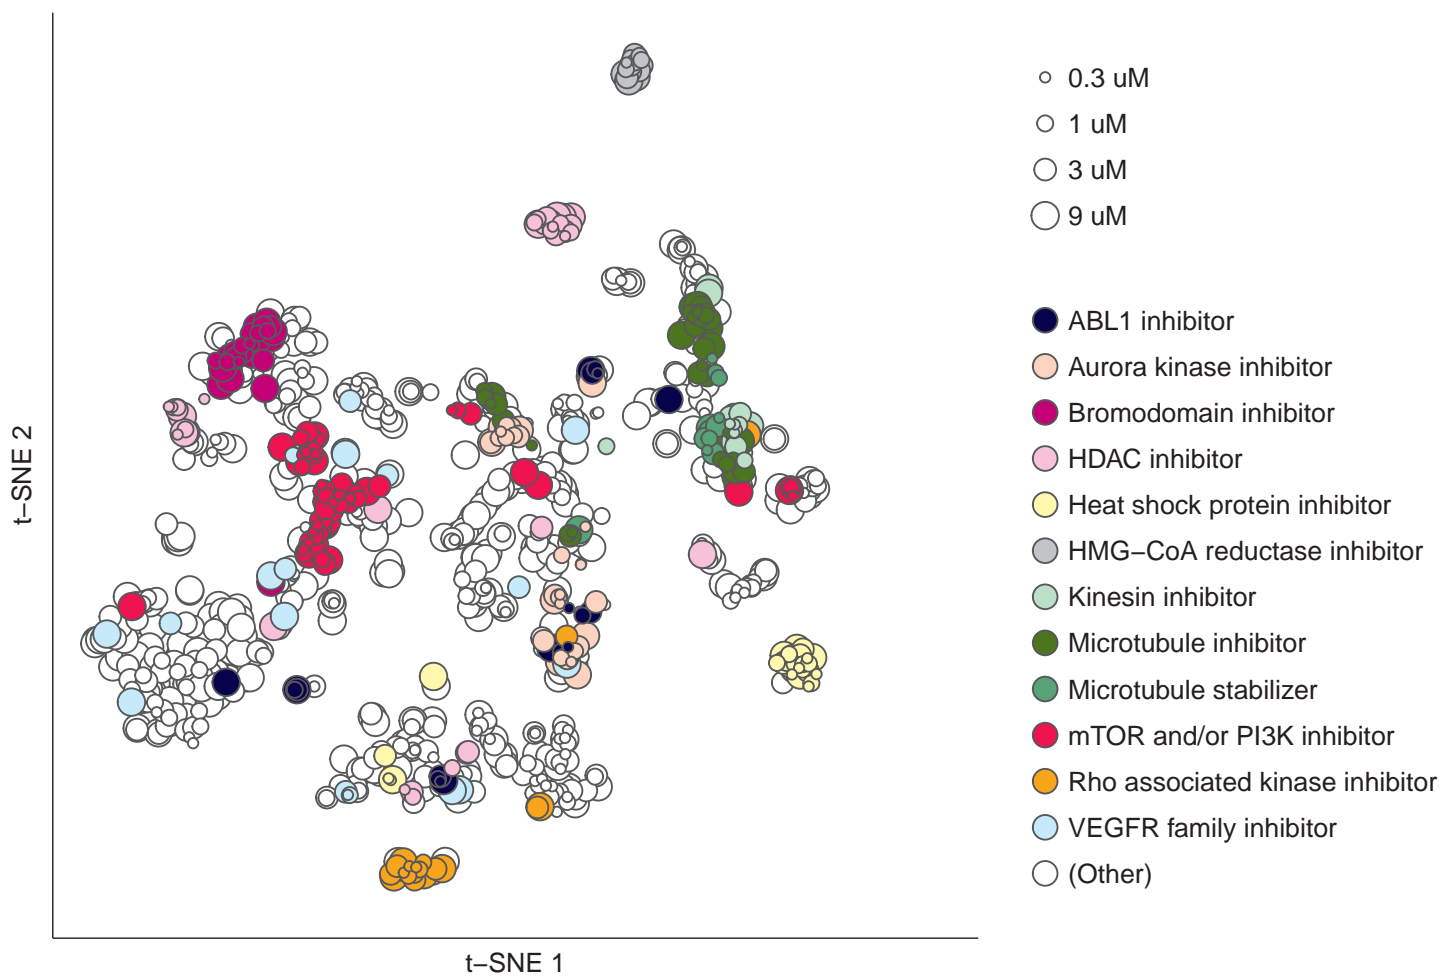

# HepG2-CANX-COX4I1

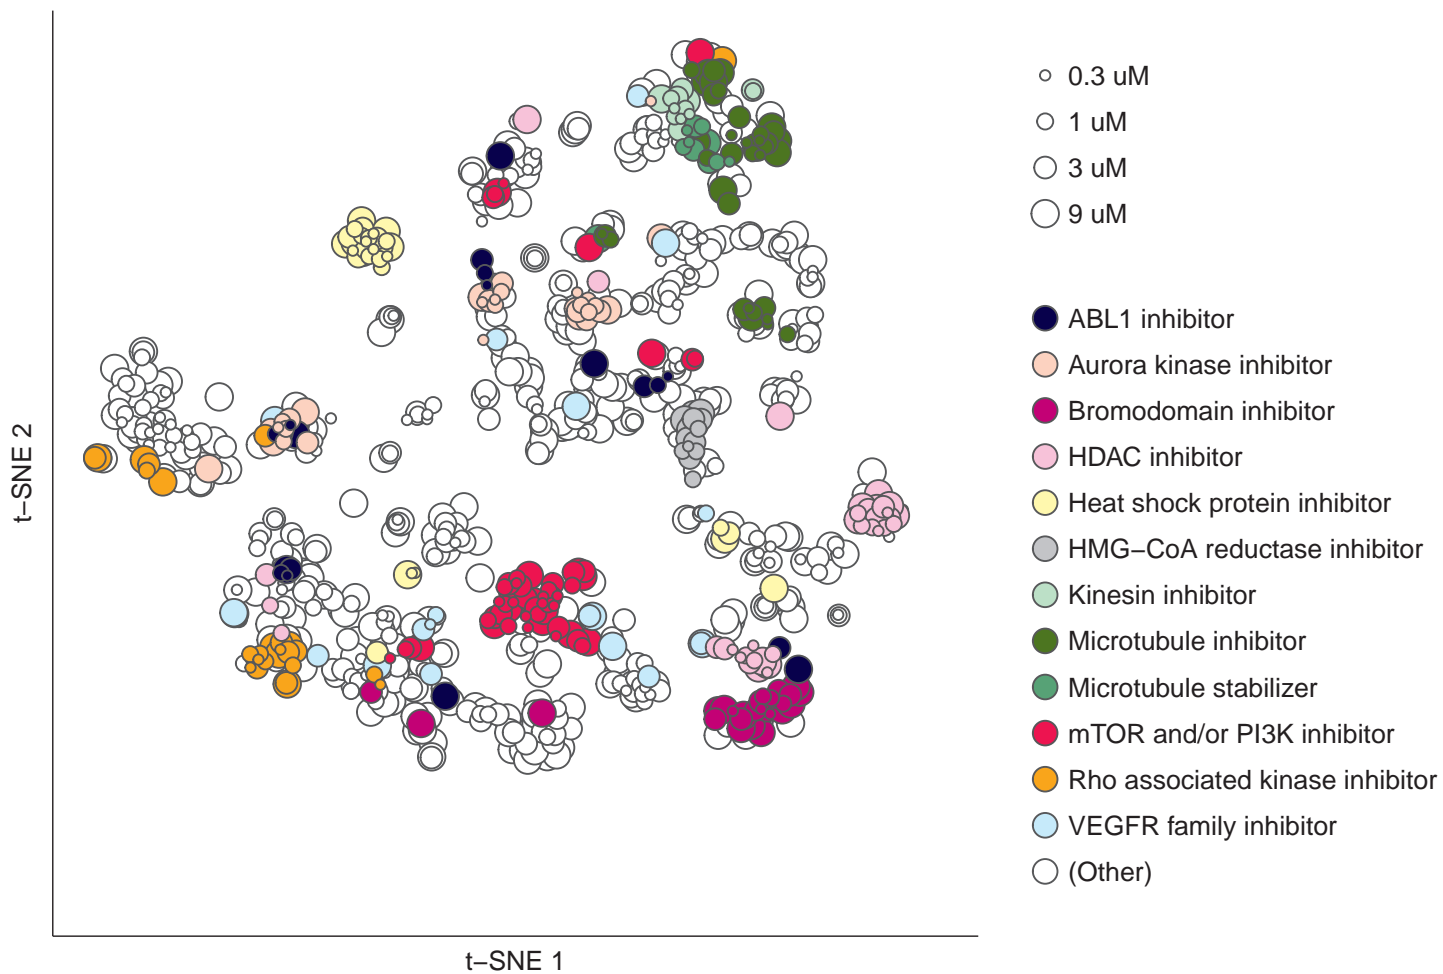



### HepG2-GM130-SQSTM1

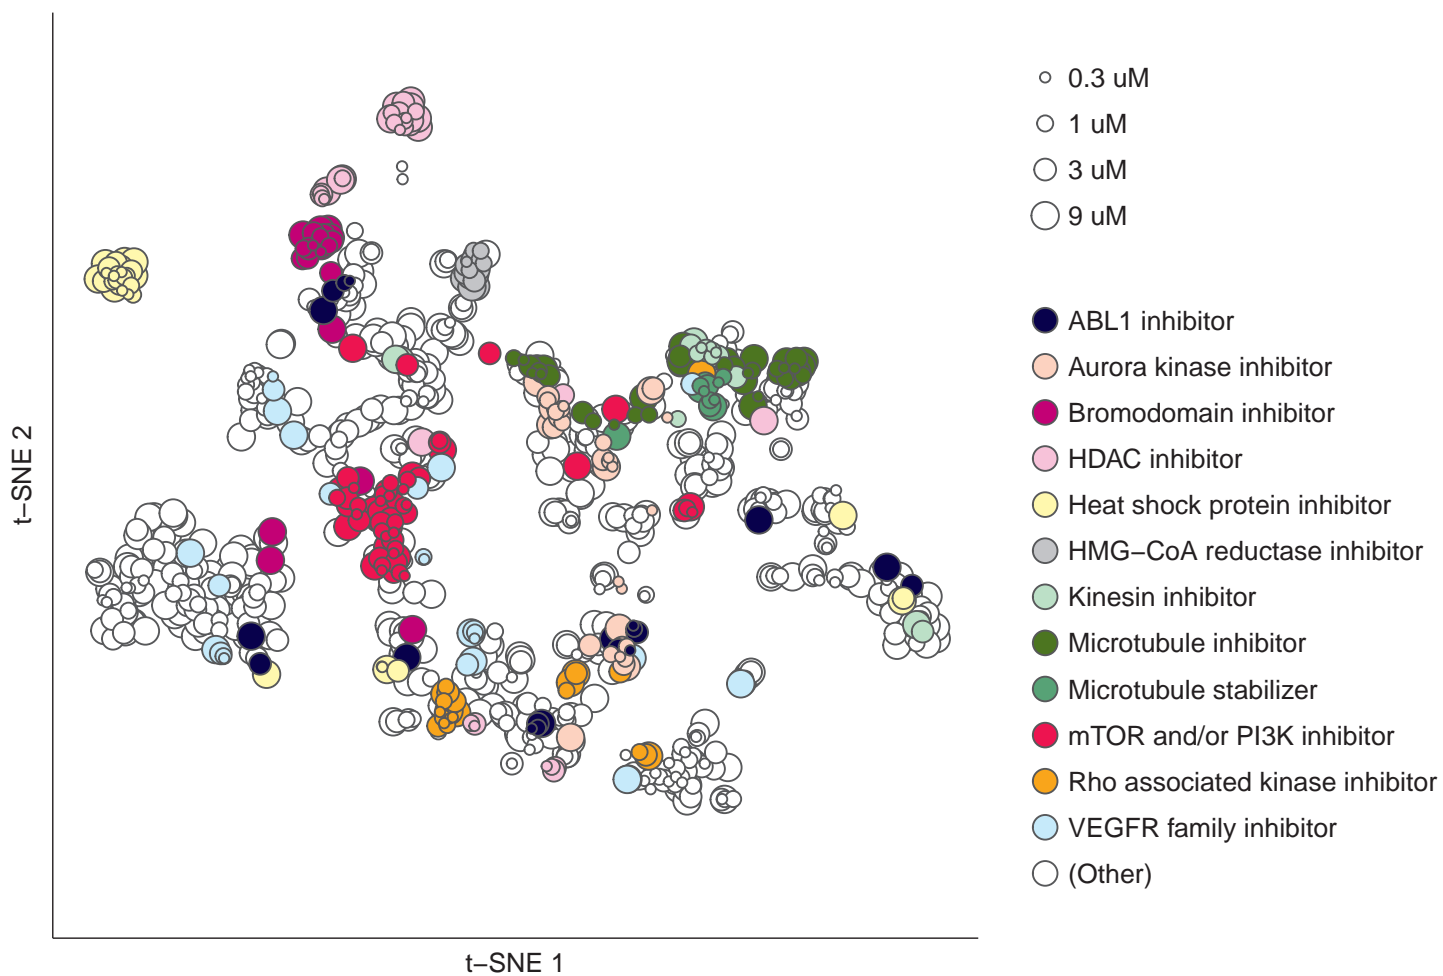

# HepG2-TP53BP1-CLTA

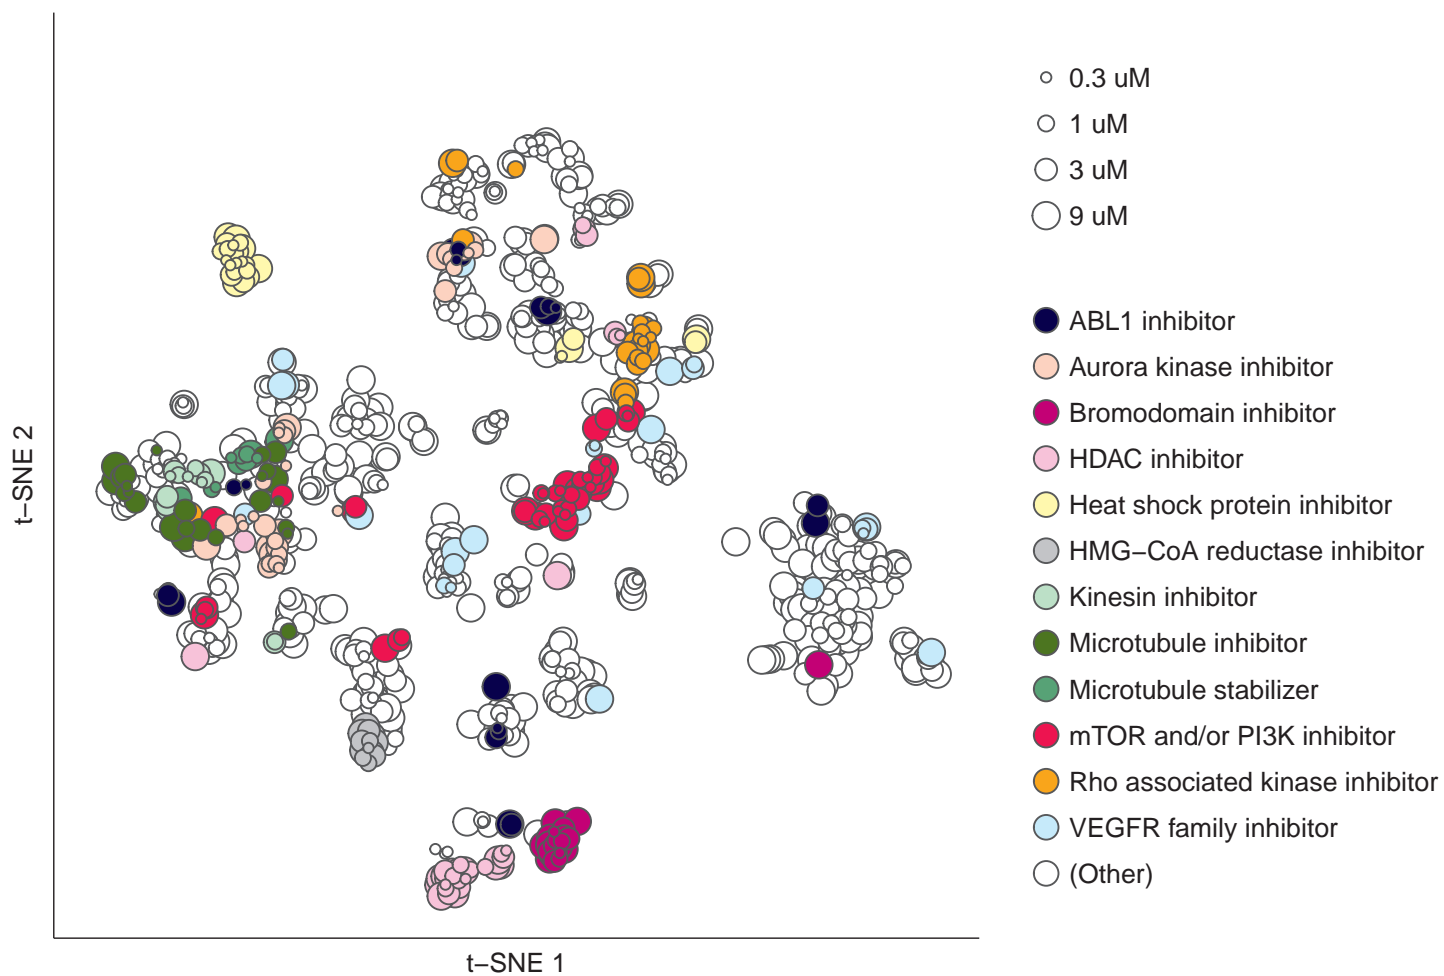

# HepG2-TUBA1B-RELA

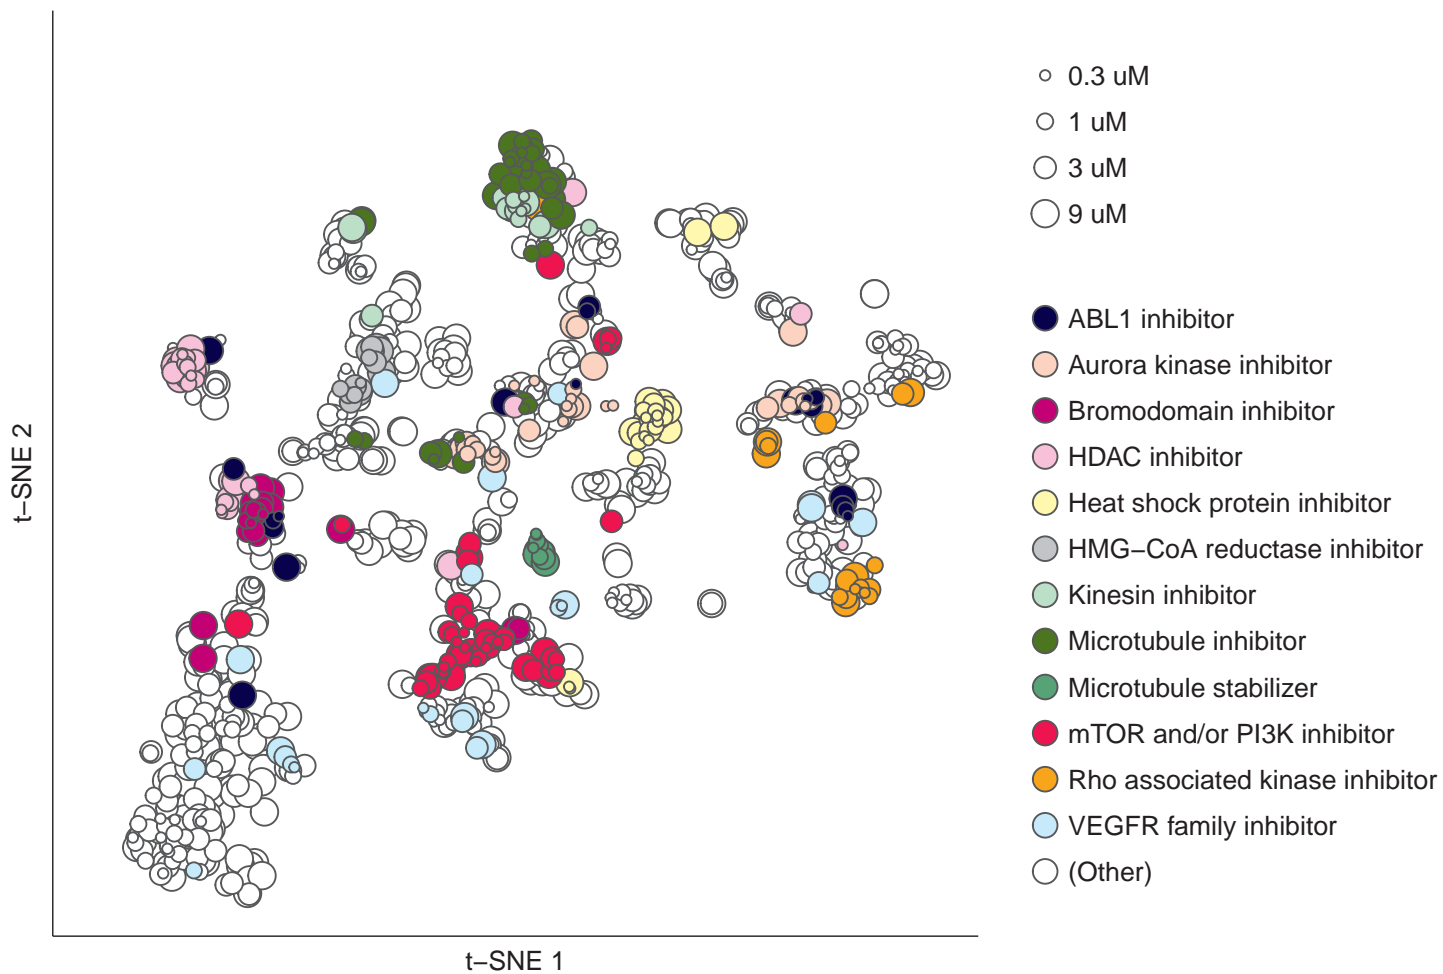

# WPMY1-ACTB-RAB5A

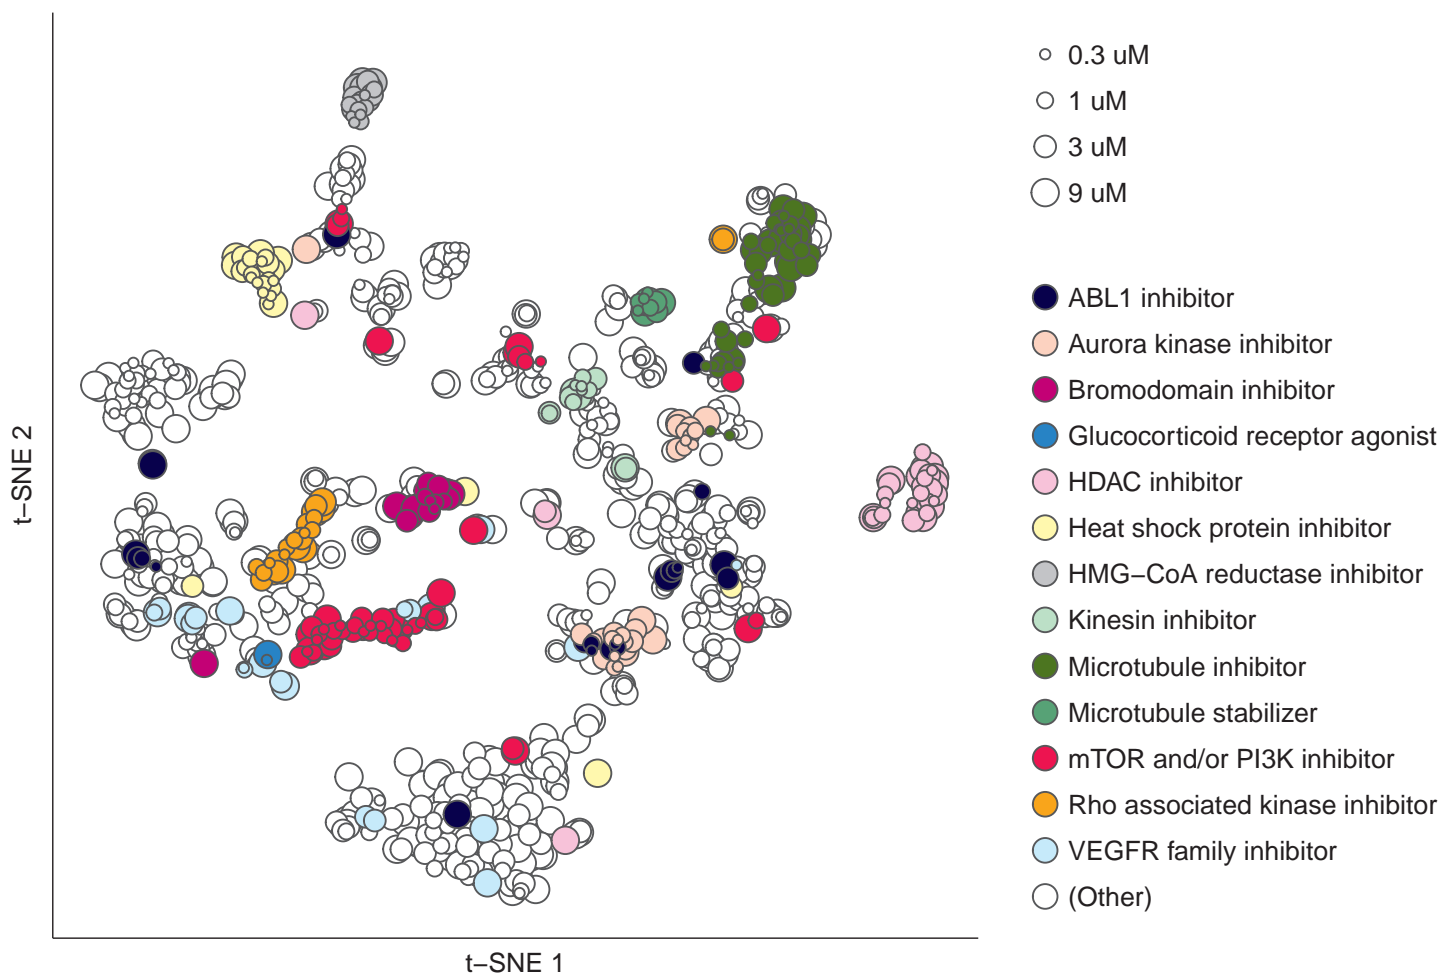

# WPMY1-CANX-COX4I1

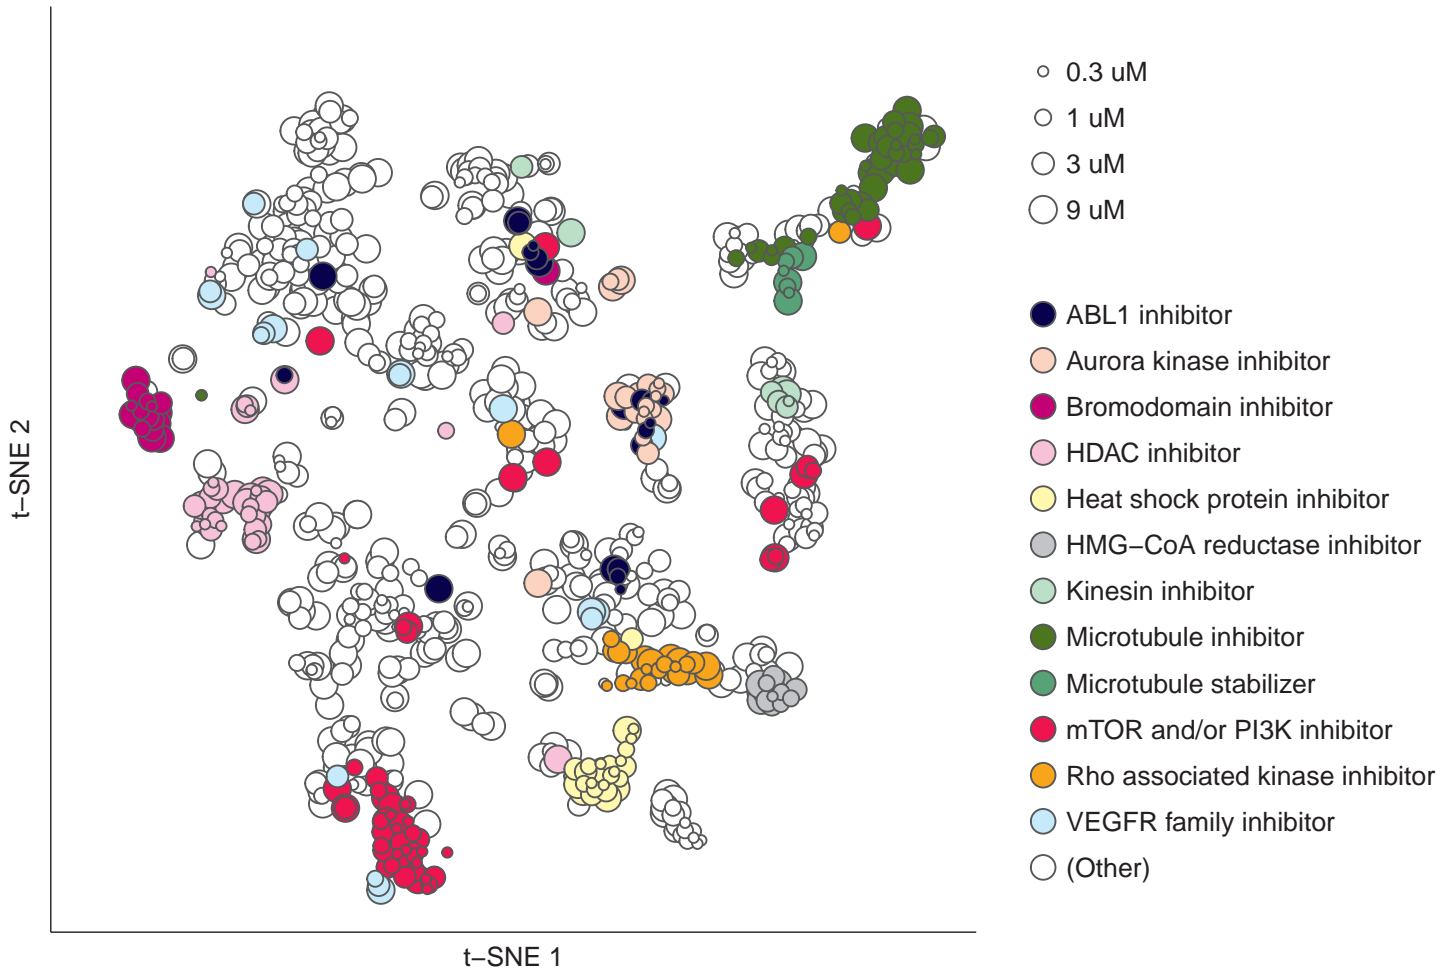

# WPMY1-GM130-SQSTM1

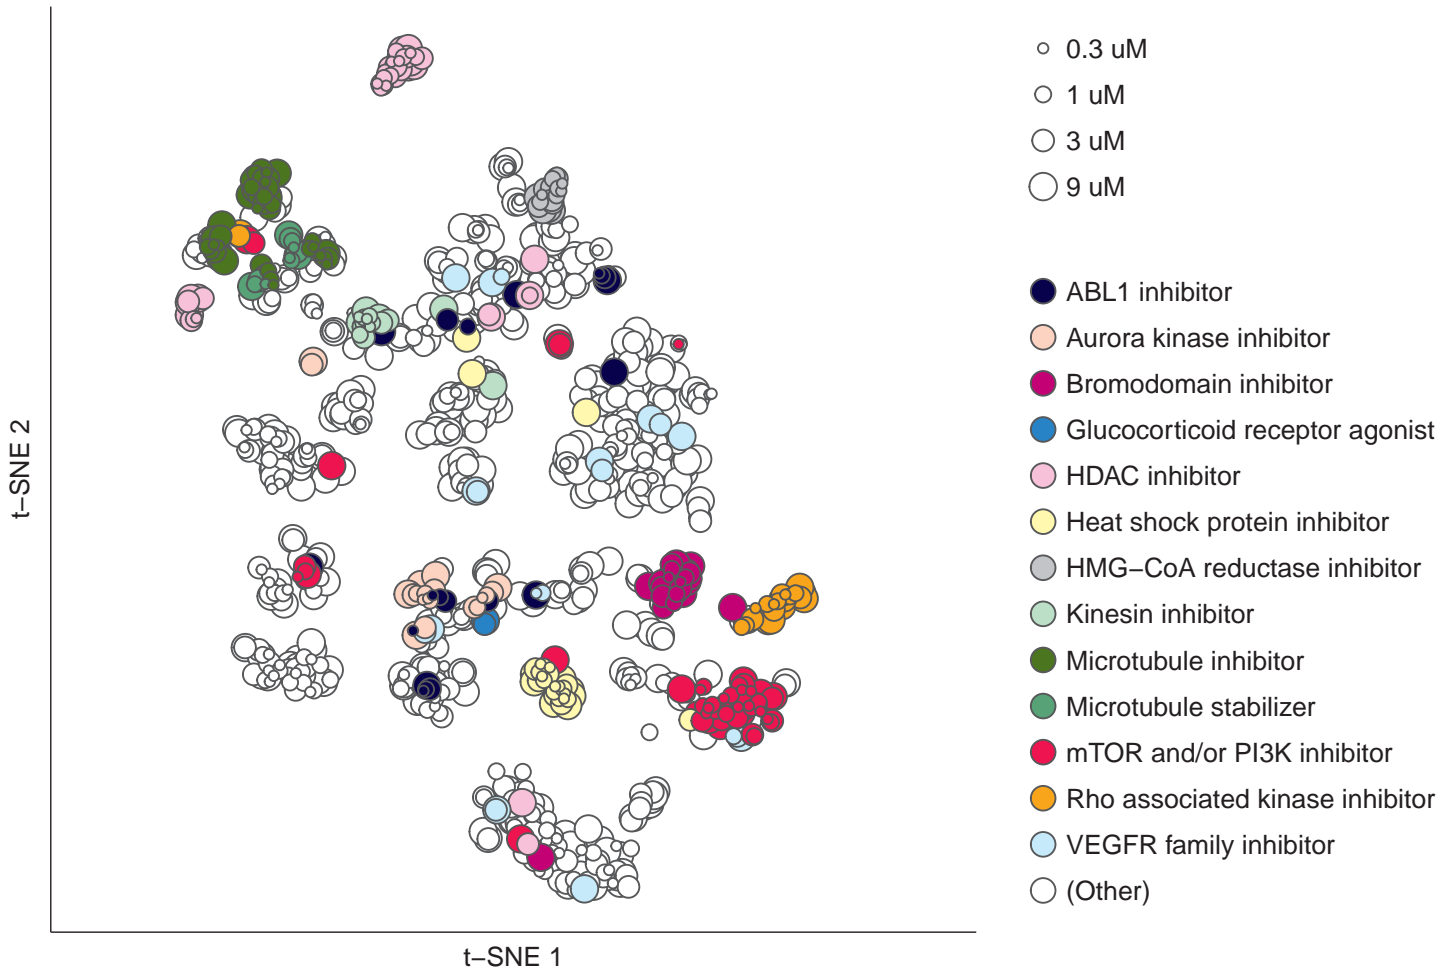

WPMY1-TP53BP1-CLTA

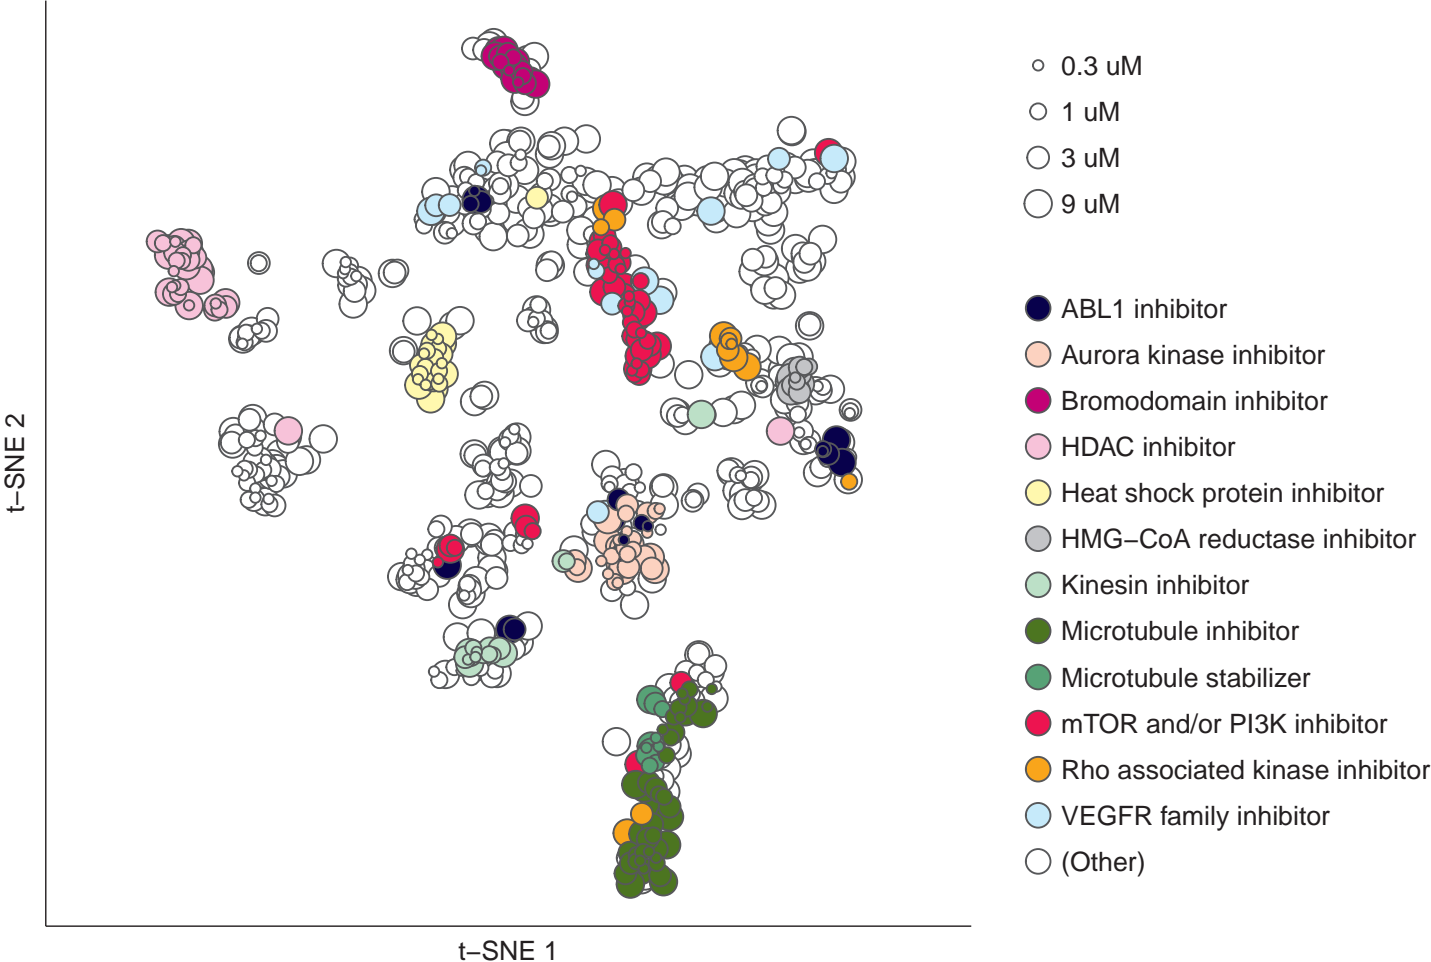

# WPMY1-TUBA1B-RELA

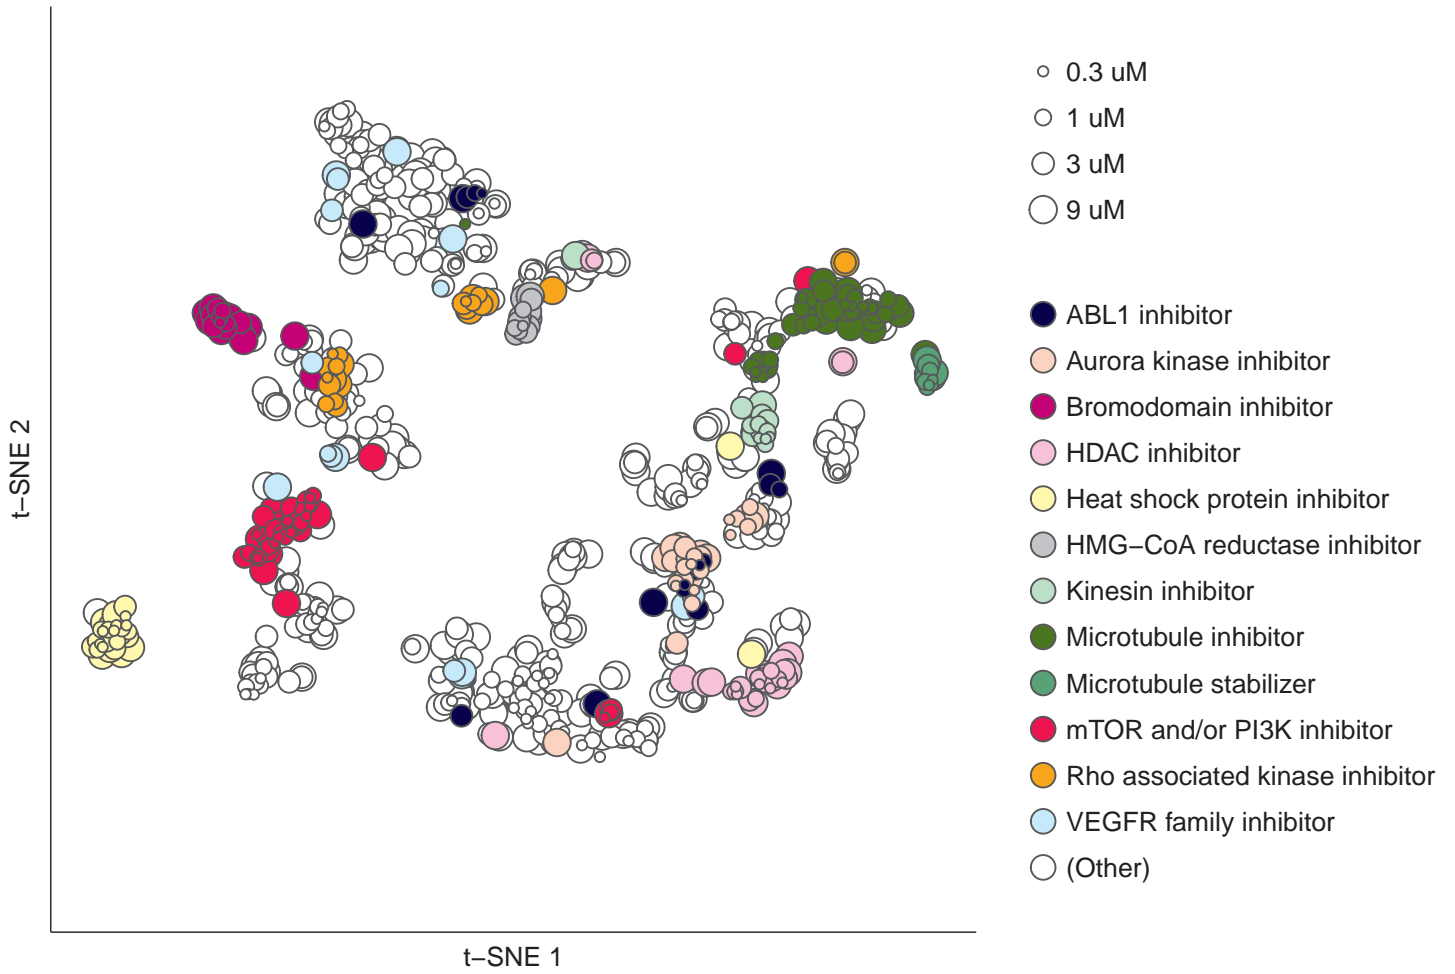

Supplement: 41598_2020_69354_MOESM2_ESM.pdf [file 41598_2020_69354_MOESM2_ESM.pdf]
