# Supplementary material for: Tales of 1,008 small molecules: phenomic profiling through live-cell imaging in a panel of reporter cell lines
Source: PubMed Central journal article supplement (PMC7411054; doi:10.1038/s41598-020-69354-8), 2020-08-06

## **Tales of 1,008 Small Molecules: Phenomic Profiling through Live-cell Imaging in a Panel of Reporter Cell Lines**

Michael J. Cox<sup>#,1</sup>, Steffen Jaensch<sup>#,1,\*</sup>, Jelle Van de Waeter<sup>1</sup>, Laure Cougnaud<sup>2</sup>, Daan Seynaeve<sup>2</sup>, Soulayman Benalla<sup>1</sup>, Seong Joo Koo<sup>1</sup>, Ilse Van Den Wyngaert<sup>1</sup>, Jean-Marc Neefs<sup>1</sup>, Dmitry Malkov<sup>3</sup>, Mart Bittremieux<sup>1</sup>, Margino Steemans<sup>1</sup>, Pieter J. Peeters<sup>1</sup>, Jörg Kurt Wegner<sup>1</sup>, Hugo Ceulemans<sup>1</sup>, Emmanuel Gustin<sup>1</sup>, Yolanda T. Chong<sup>1,4</sup>, and Hinrich W.H. Göhlmann<sup>1</sup>

# Co-first authors

<sup>1</sup> Janssen Pharmaceutica N.V., Beerse, Belgium

<sup>2</sup> Open Analytics N.V., Antwerpen, Belgium

<sup>3</sup> MilliporeSigma, Saint Louis, MO, USA

<sup>4</sup> Present address: Recursion, Salt Lake City, UT, USA

\* Corresponding author: Steffen Jaensch, Janssen Pharmaceutica N.V., Turnhoutseweg 30, 2340 Beerse, Belgium, SJAENSCH@its.jnj.com

### **Supplementary Figure S8**

Graphical representation of the AUC-ROC values for all 83 MoAs with  $\geq 3$  active compounds. These AUC-ROC values are also listed in Supplementary Table S4.

# ABL1<sup>inhibitor</sup>

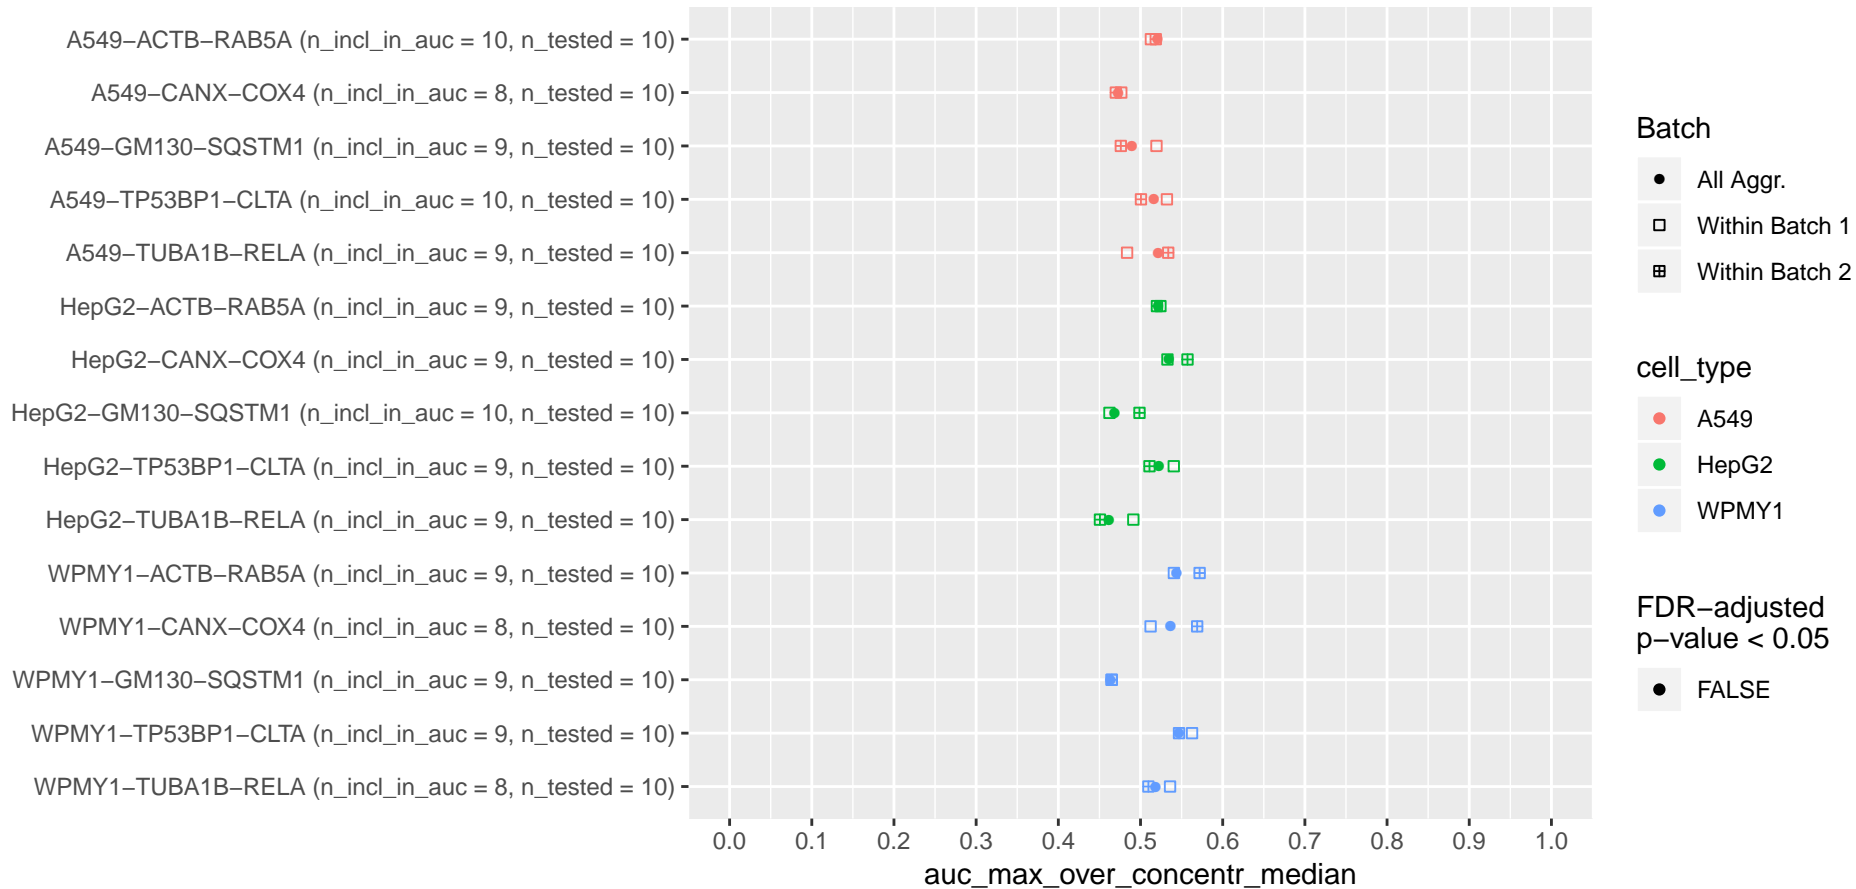

# ALK/LTK family^inhibitor

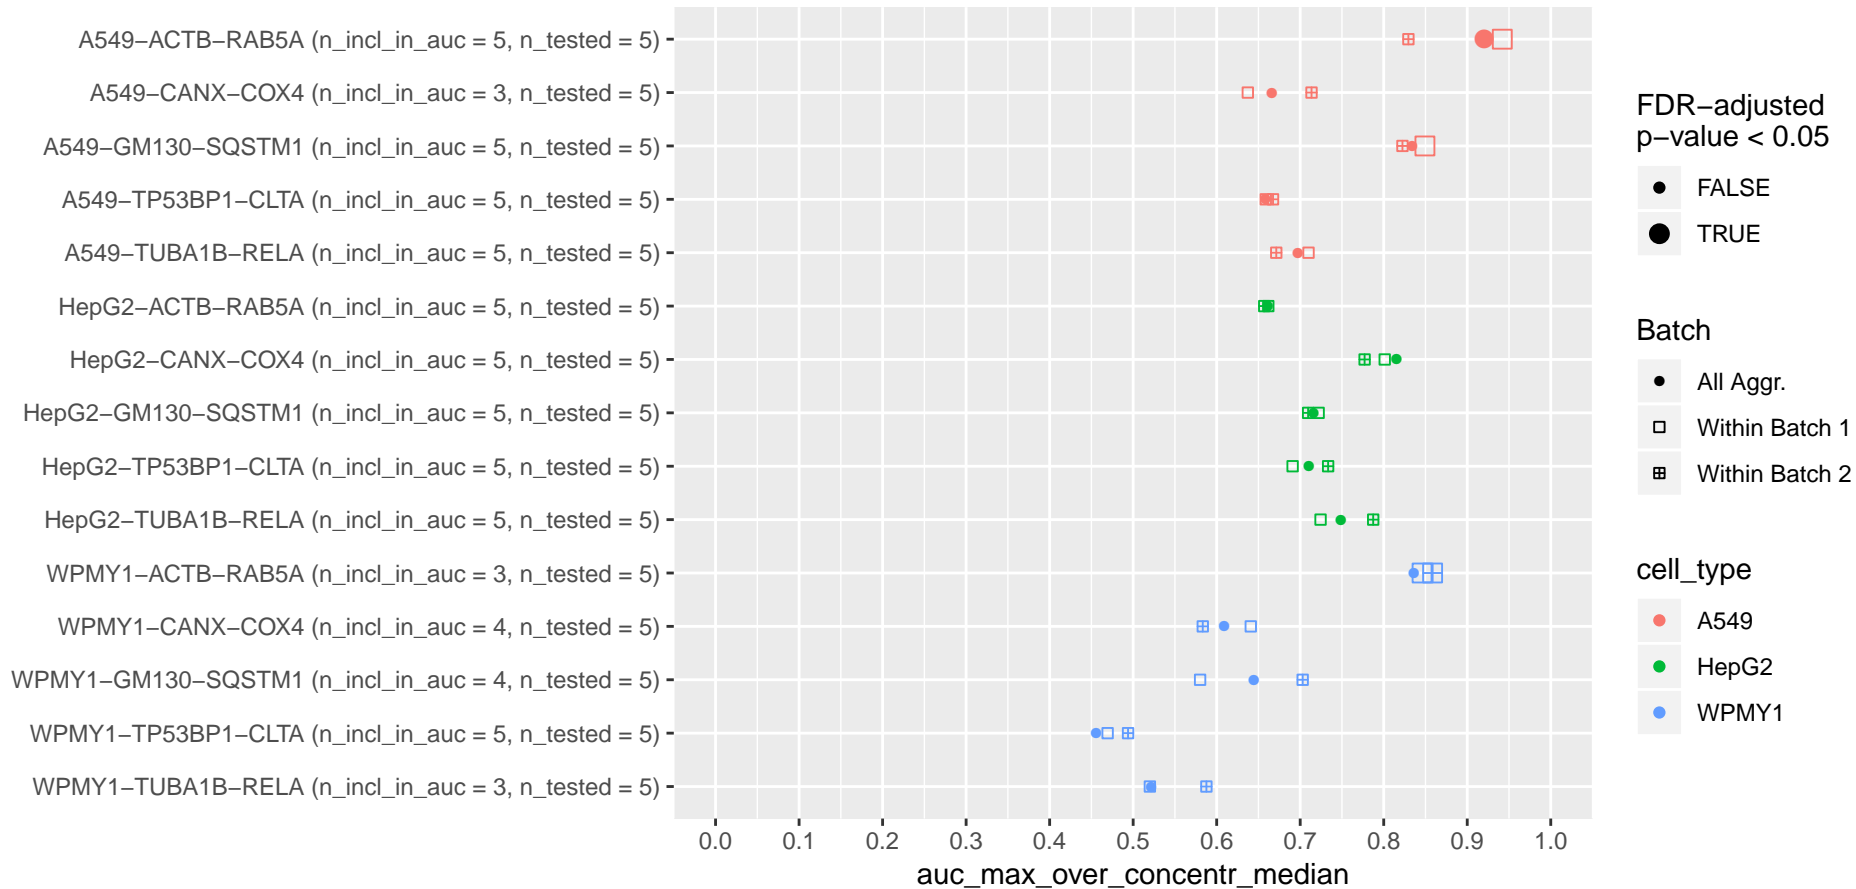

ATM<sup>hi</sup>inhibitor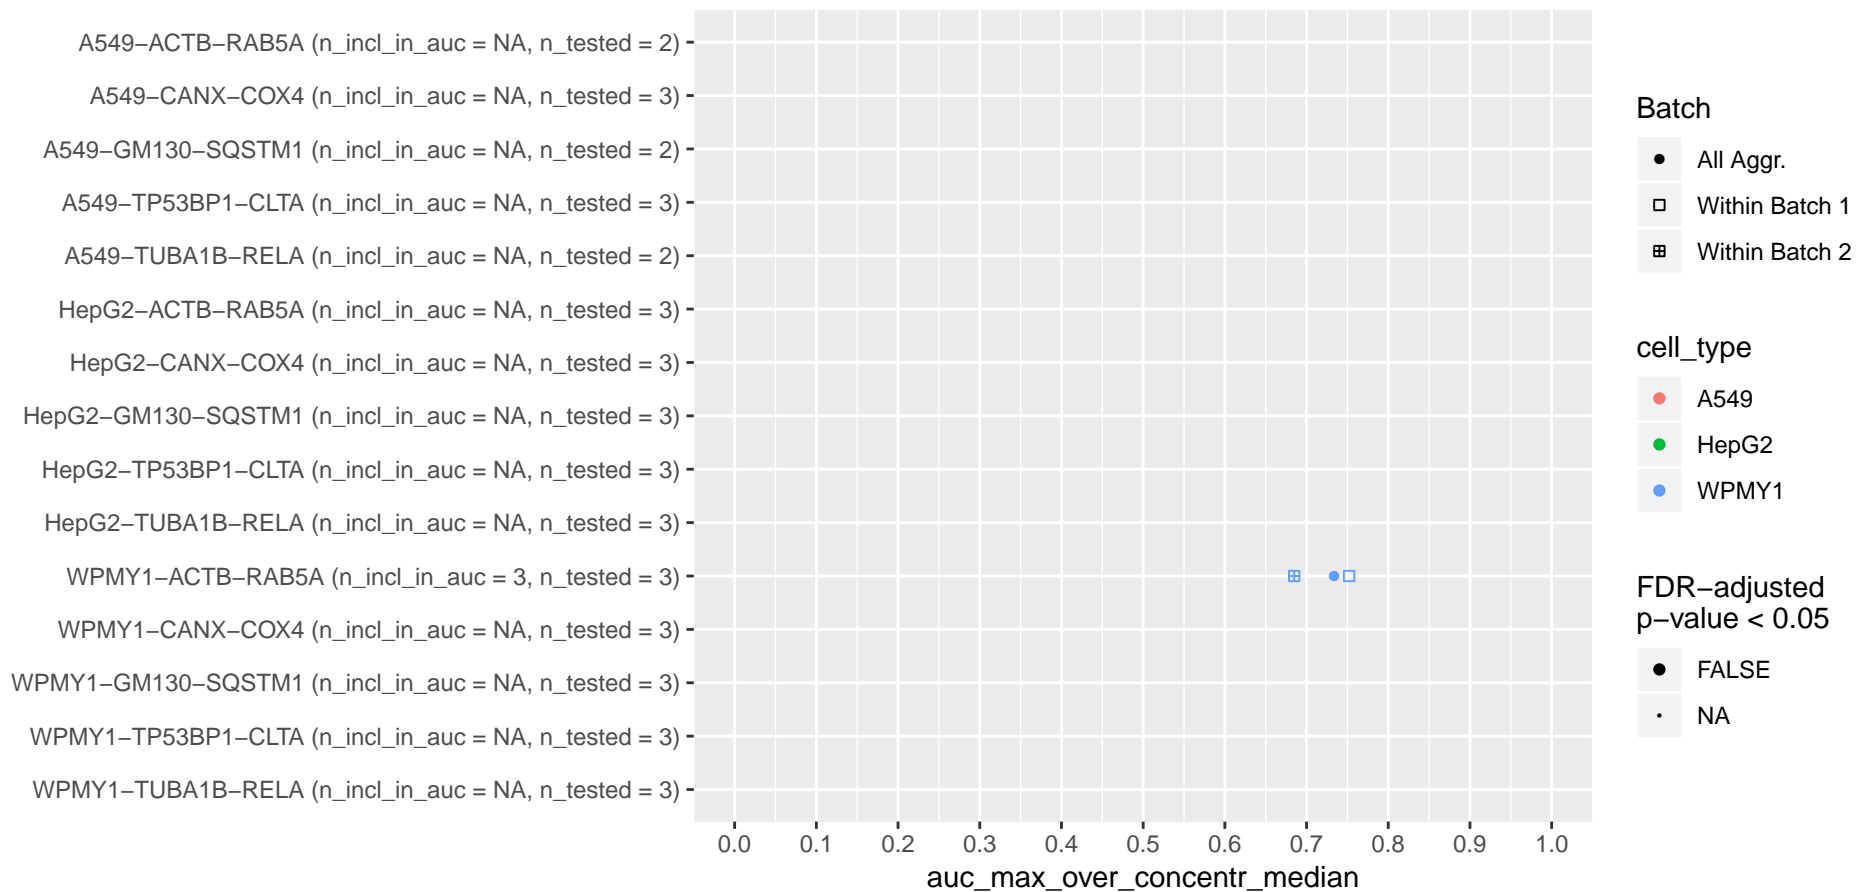

# Actin<sup>inhibitor</sup>

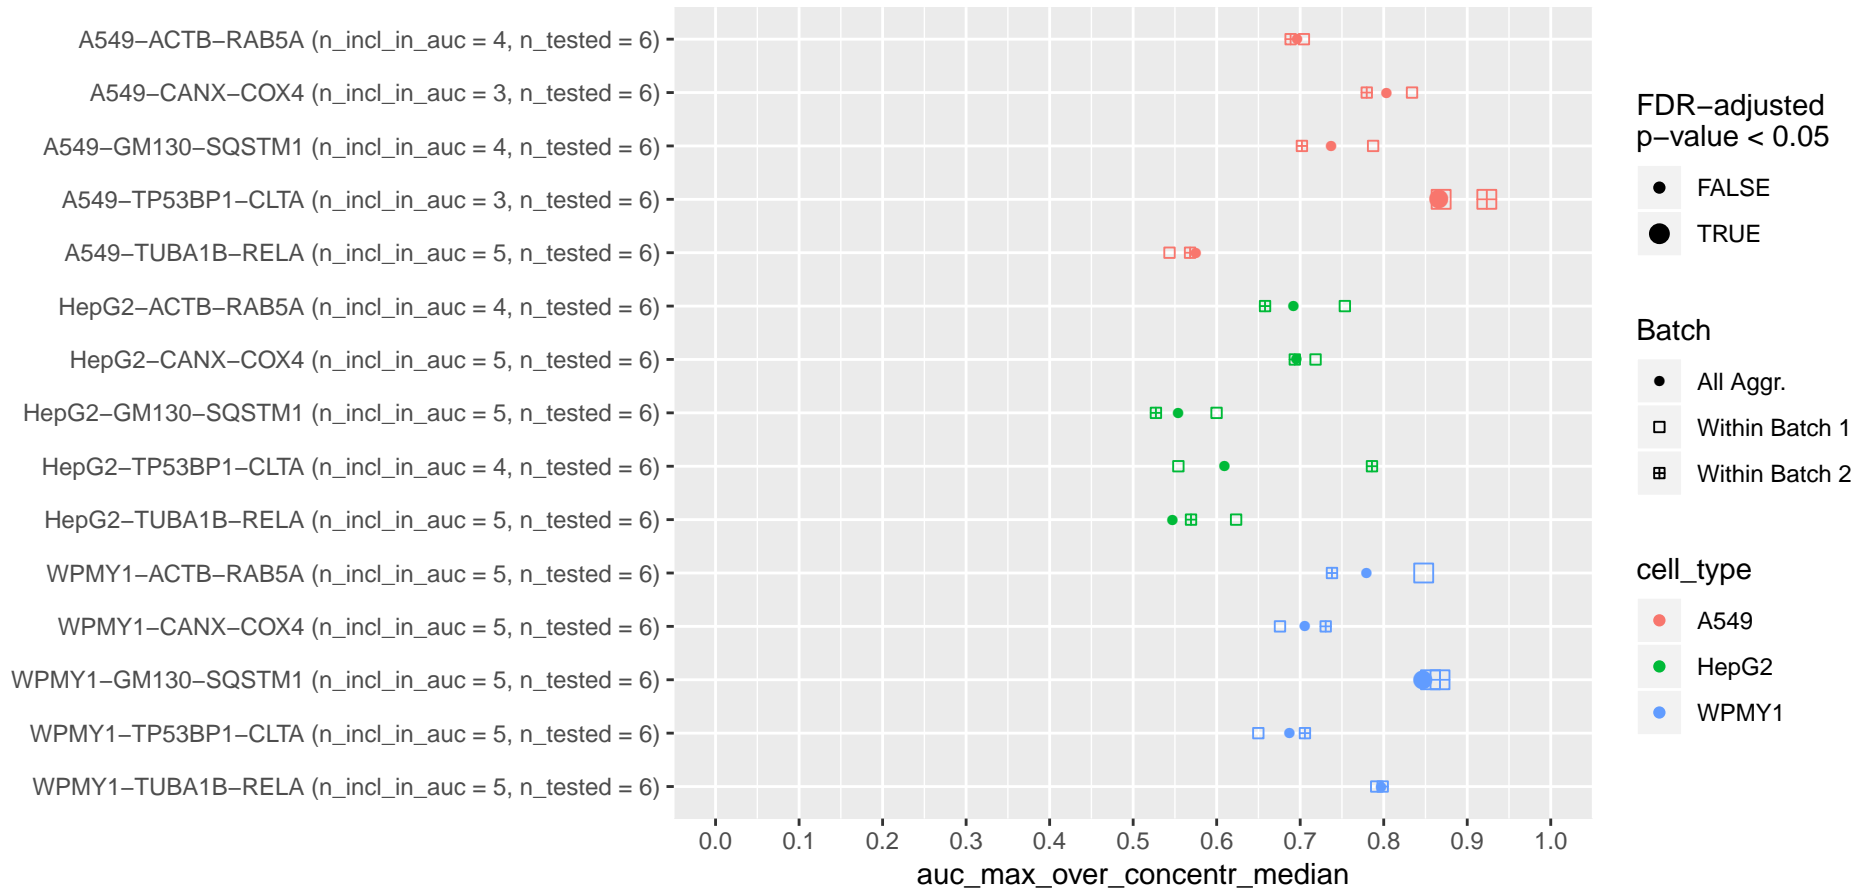

Akt<sup>inhibitor</sup>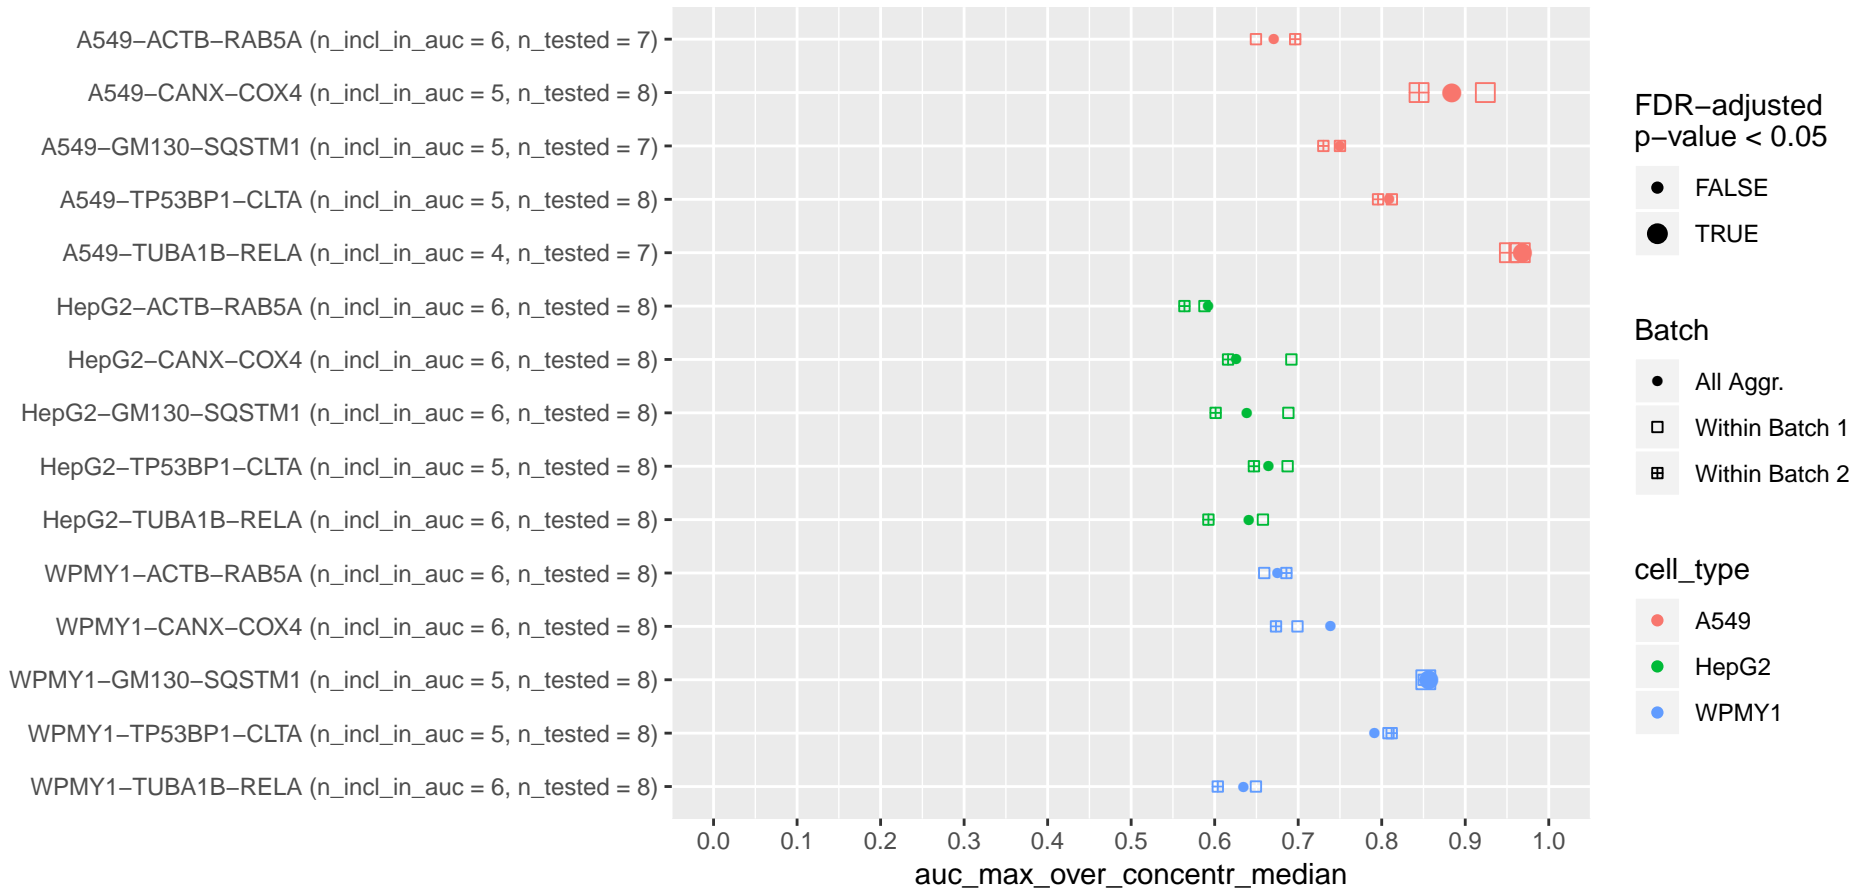

# Alpha-adrenergic receptor^agonist

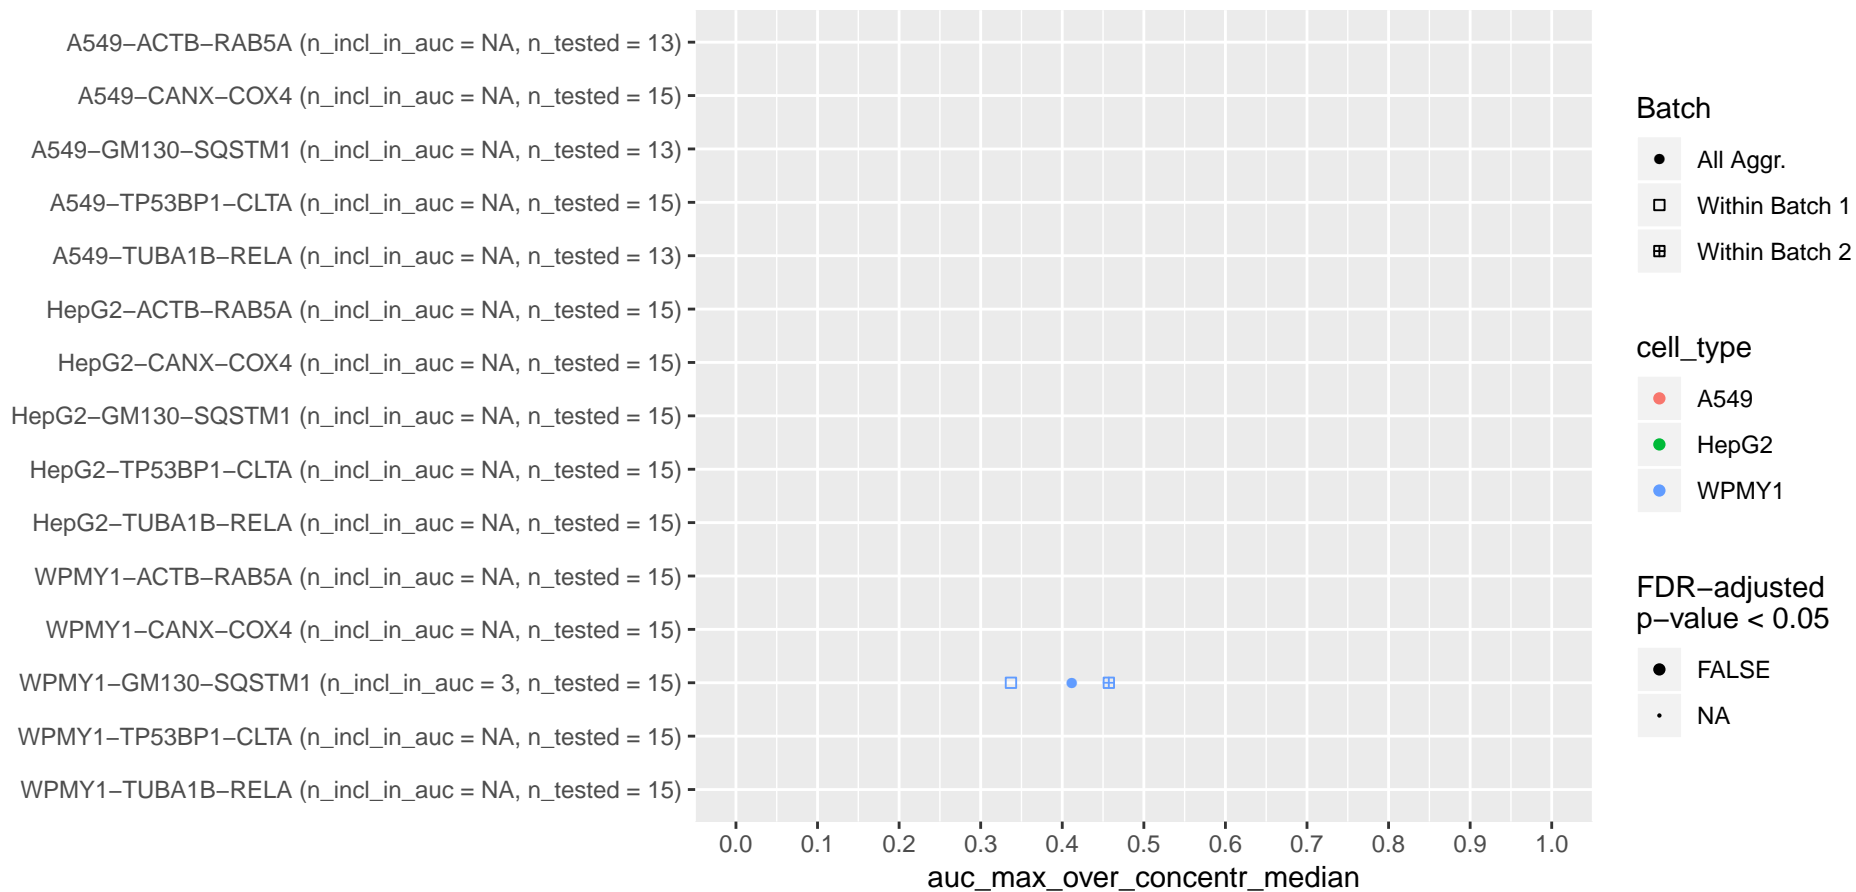

# Alpha-adrenergic receptor^antagonist

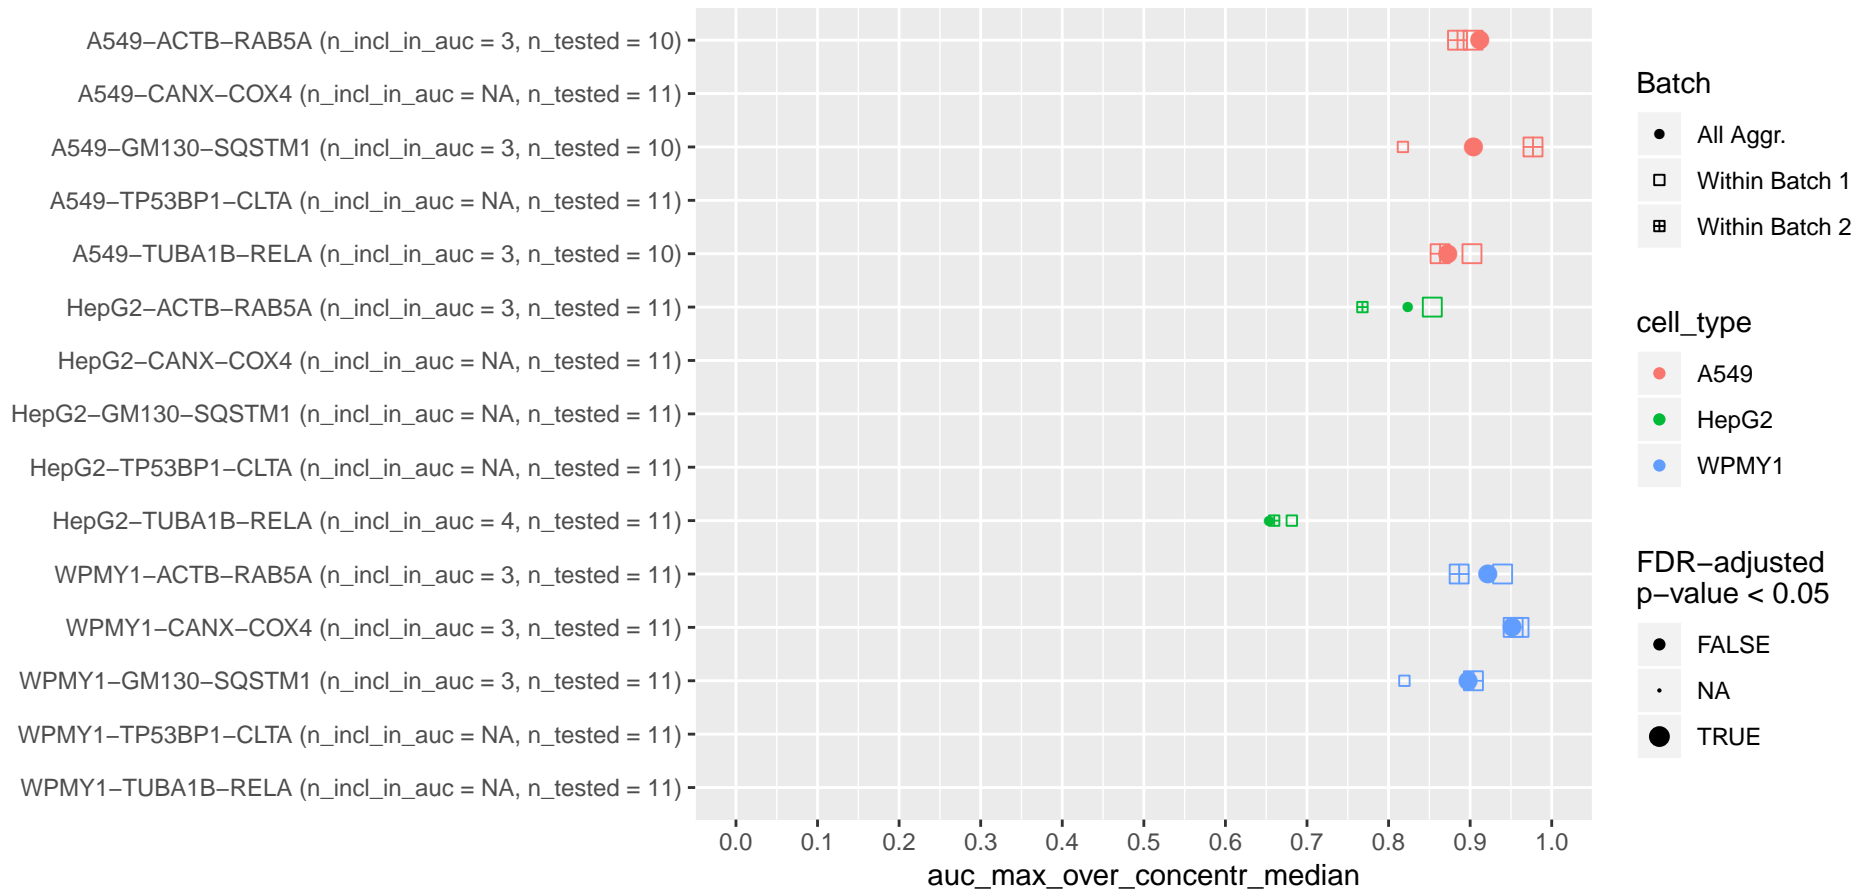



# Anti-microbial^agent

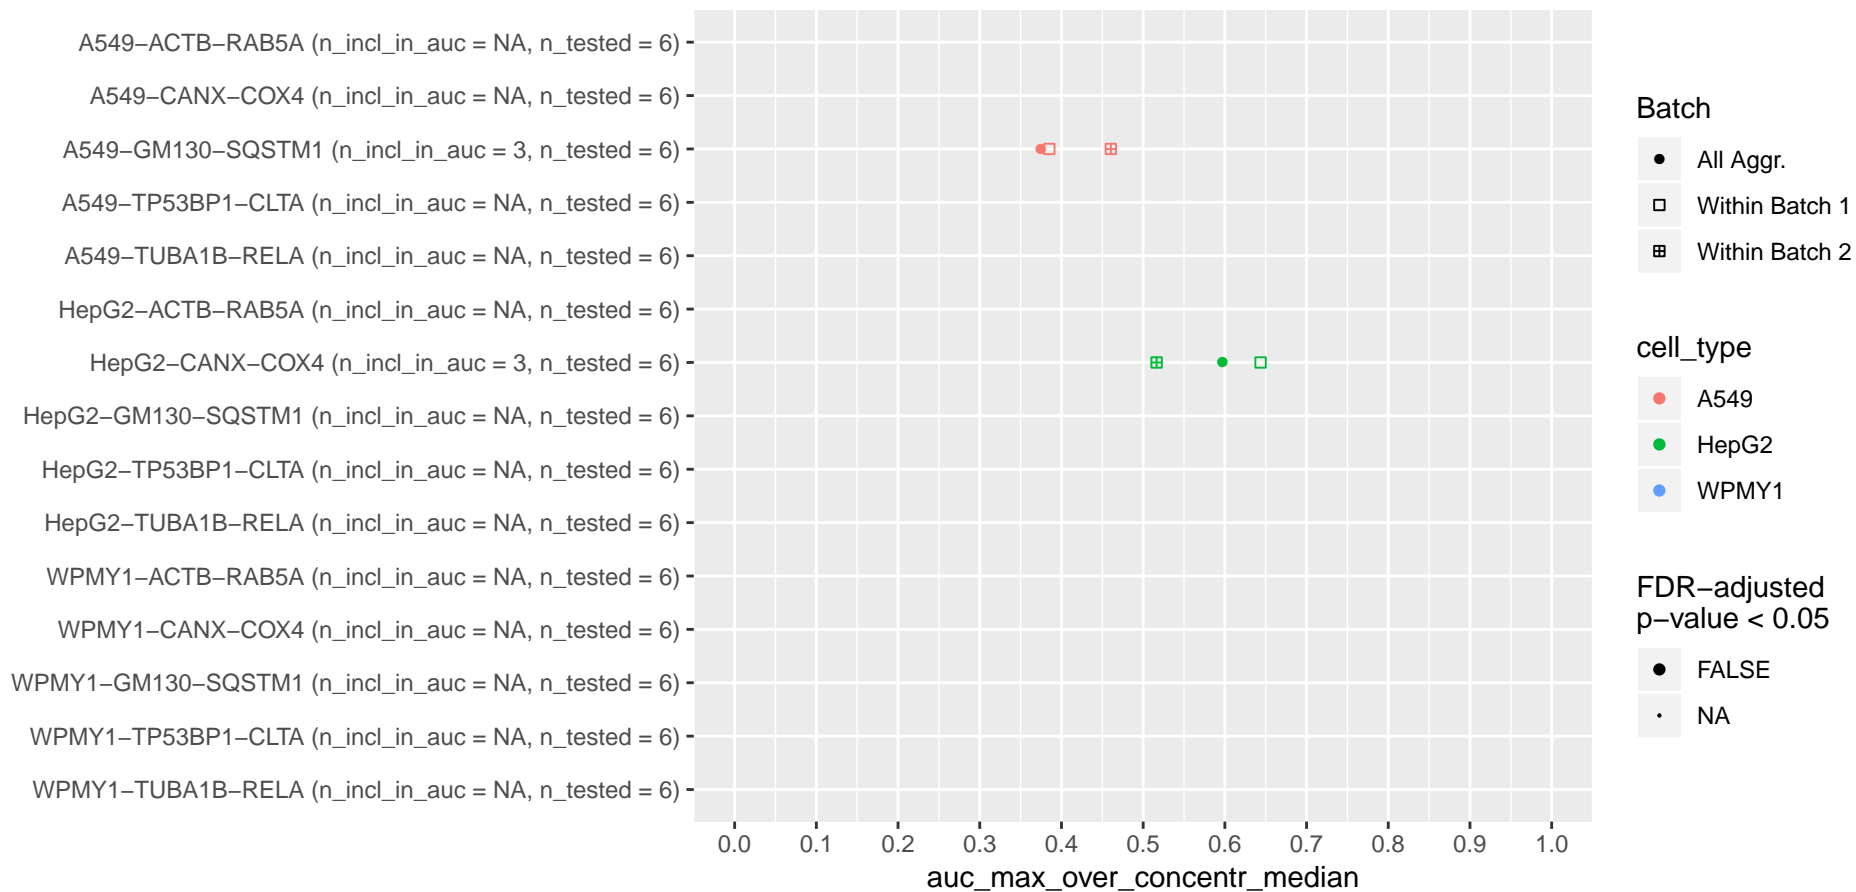

# Aurora kinase<sup>inhibitor</sup>

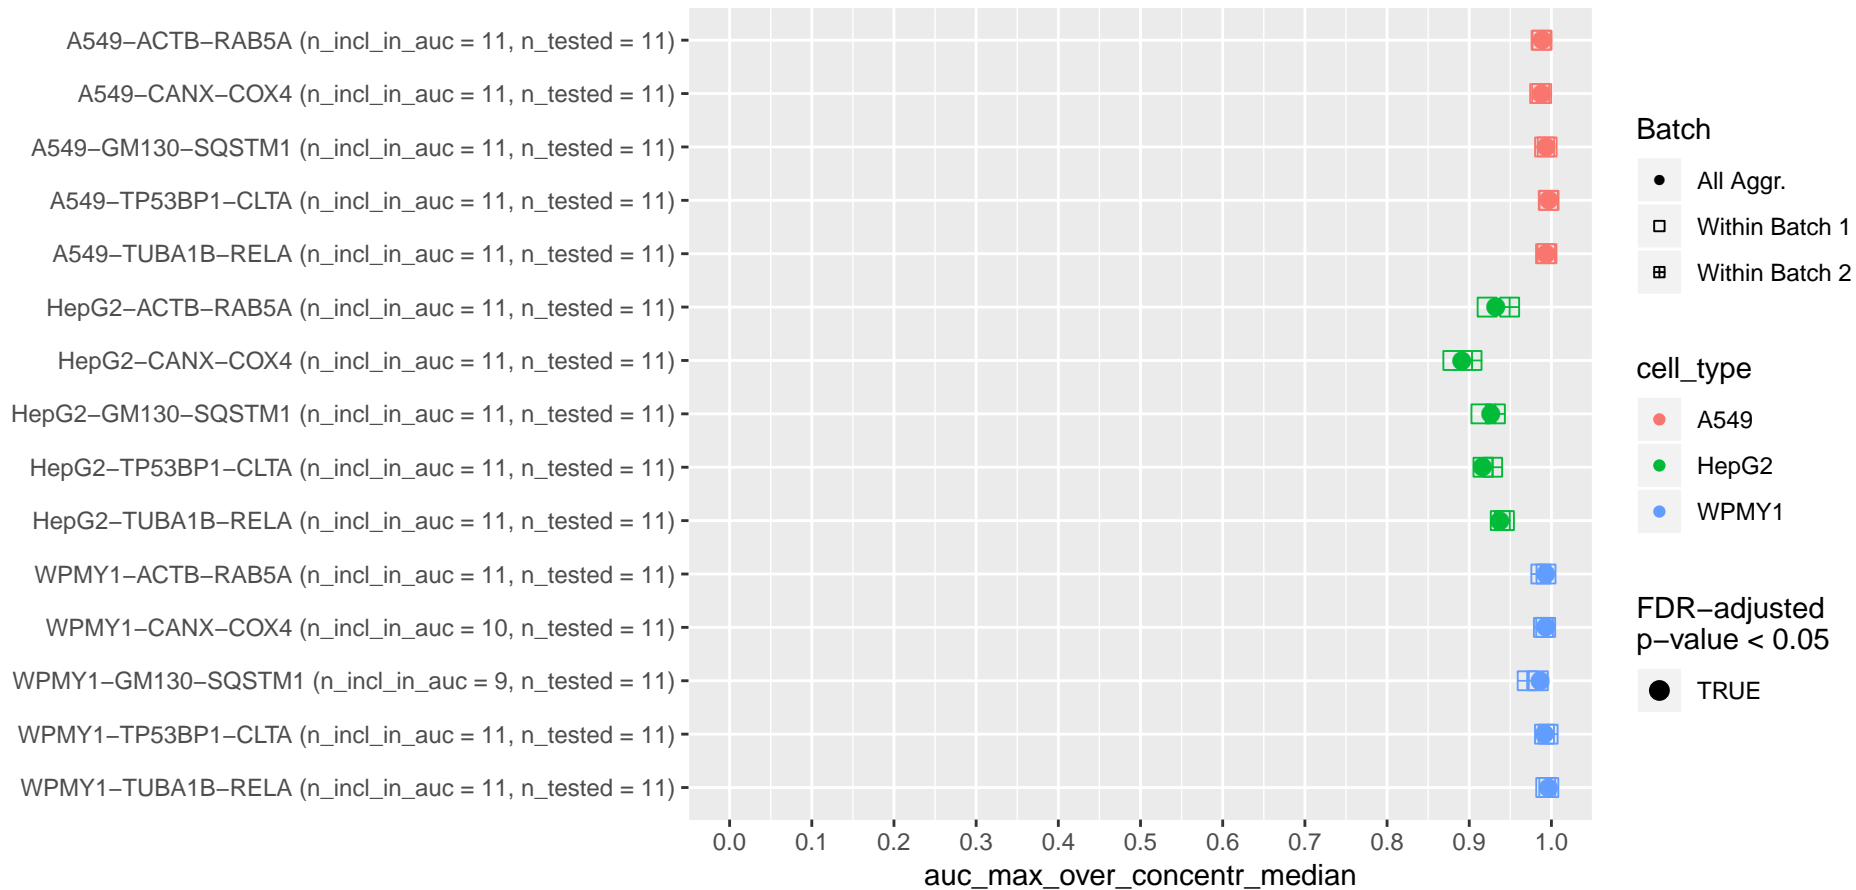

# Beta-adrenergic receptor^agonist

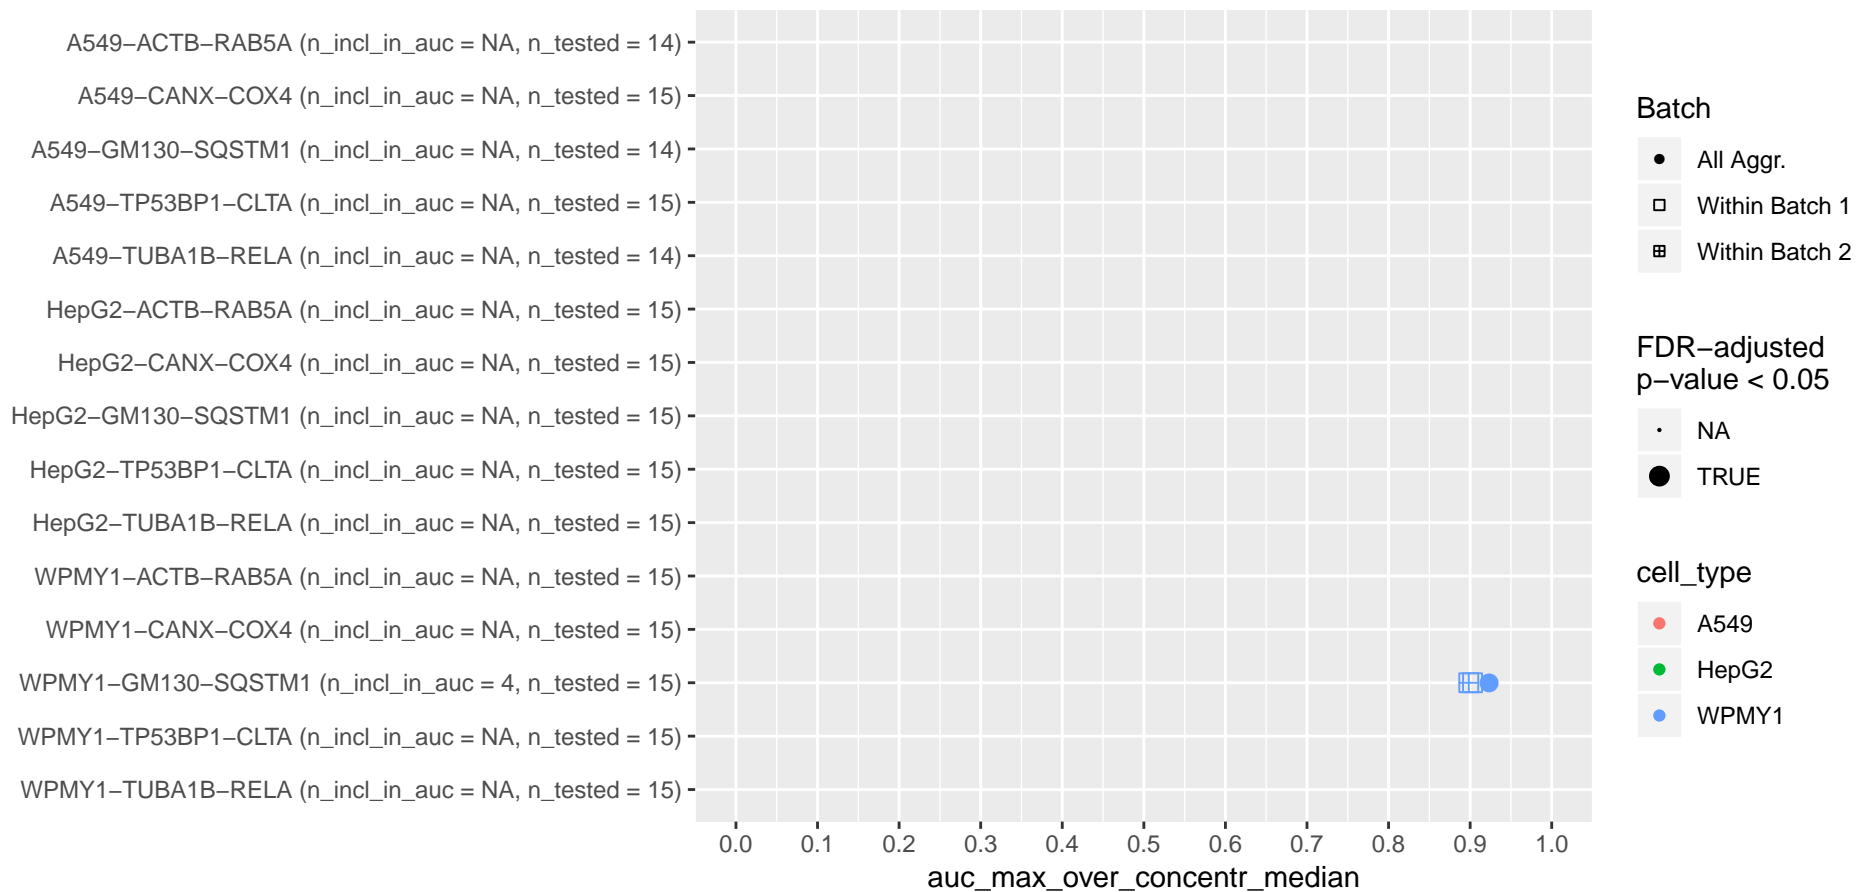

# Beta-adrenergic receptor^antagonist

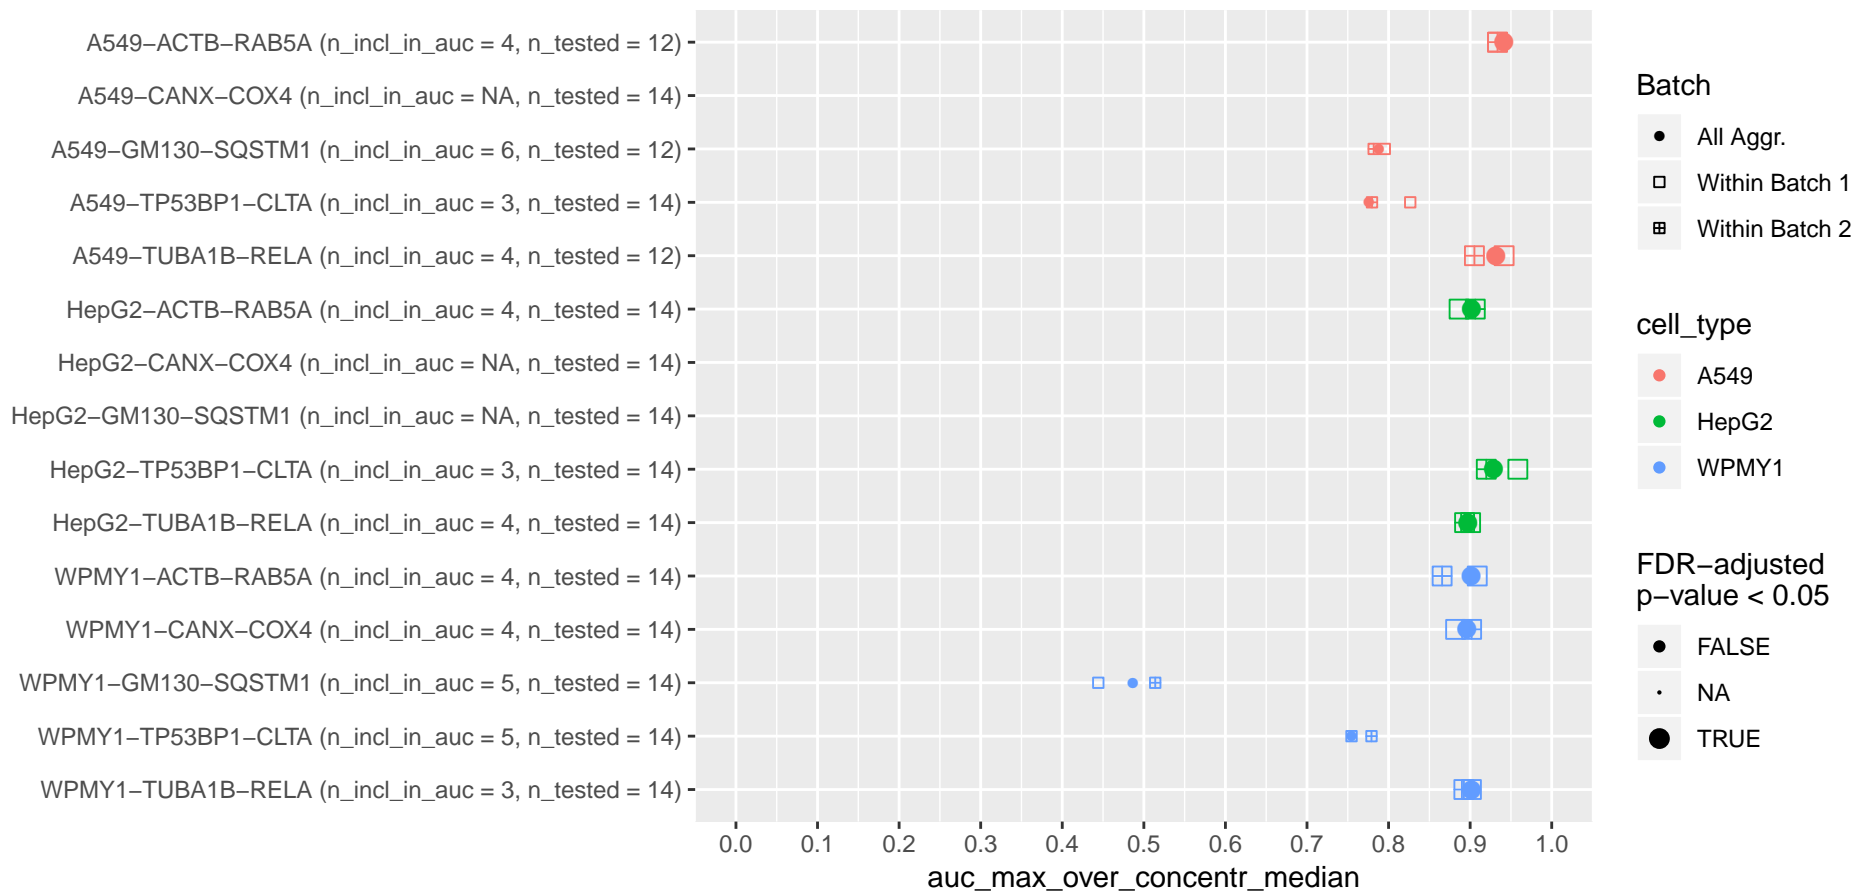

# Bromodomain<sup>inhibitor</sup>

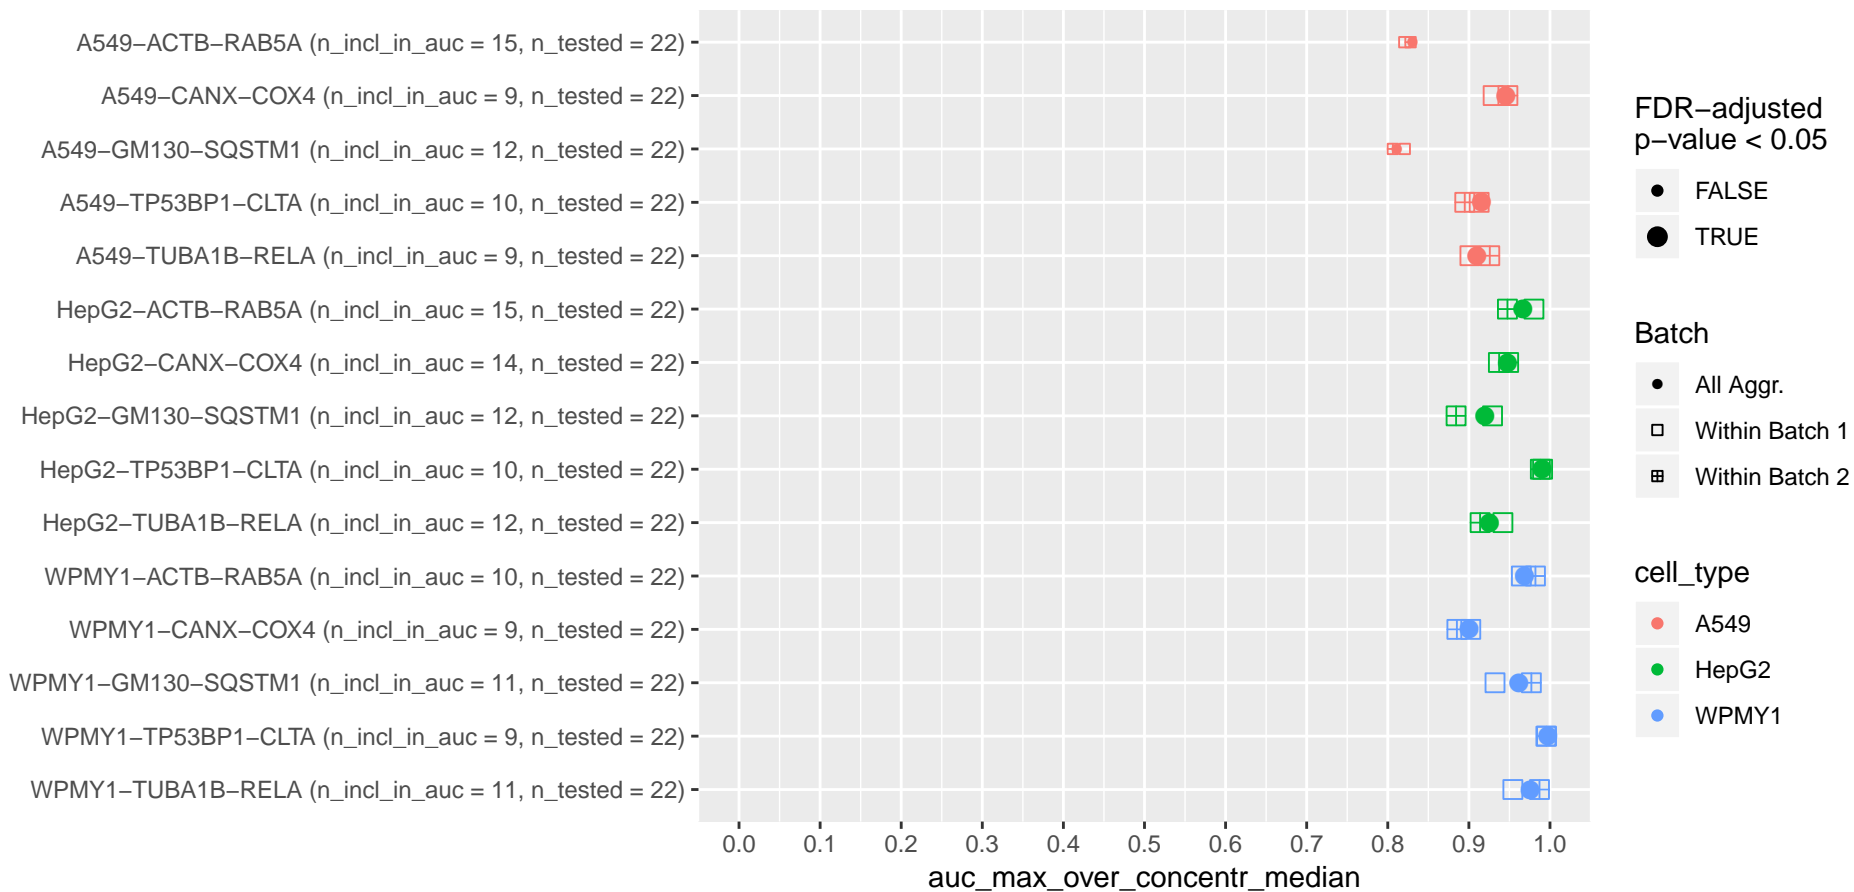

# Brutons Tyrosine Kinase/Tec family^inhibitor

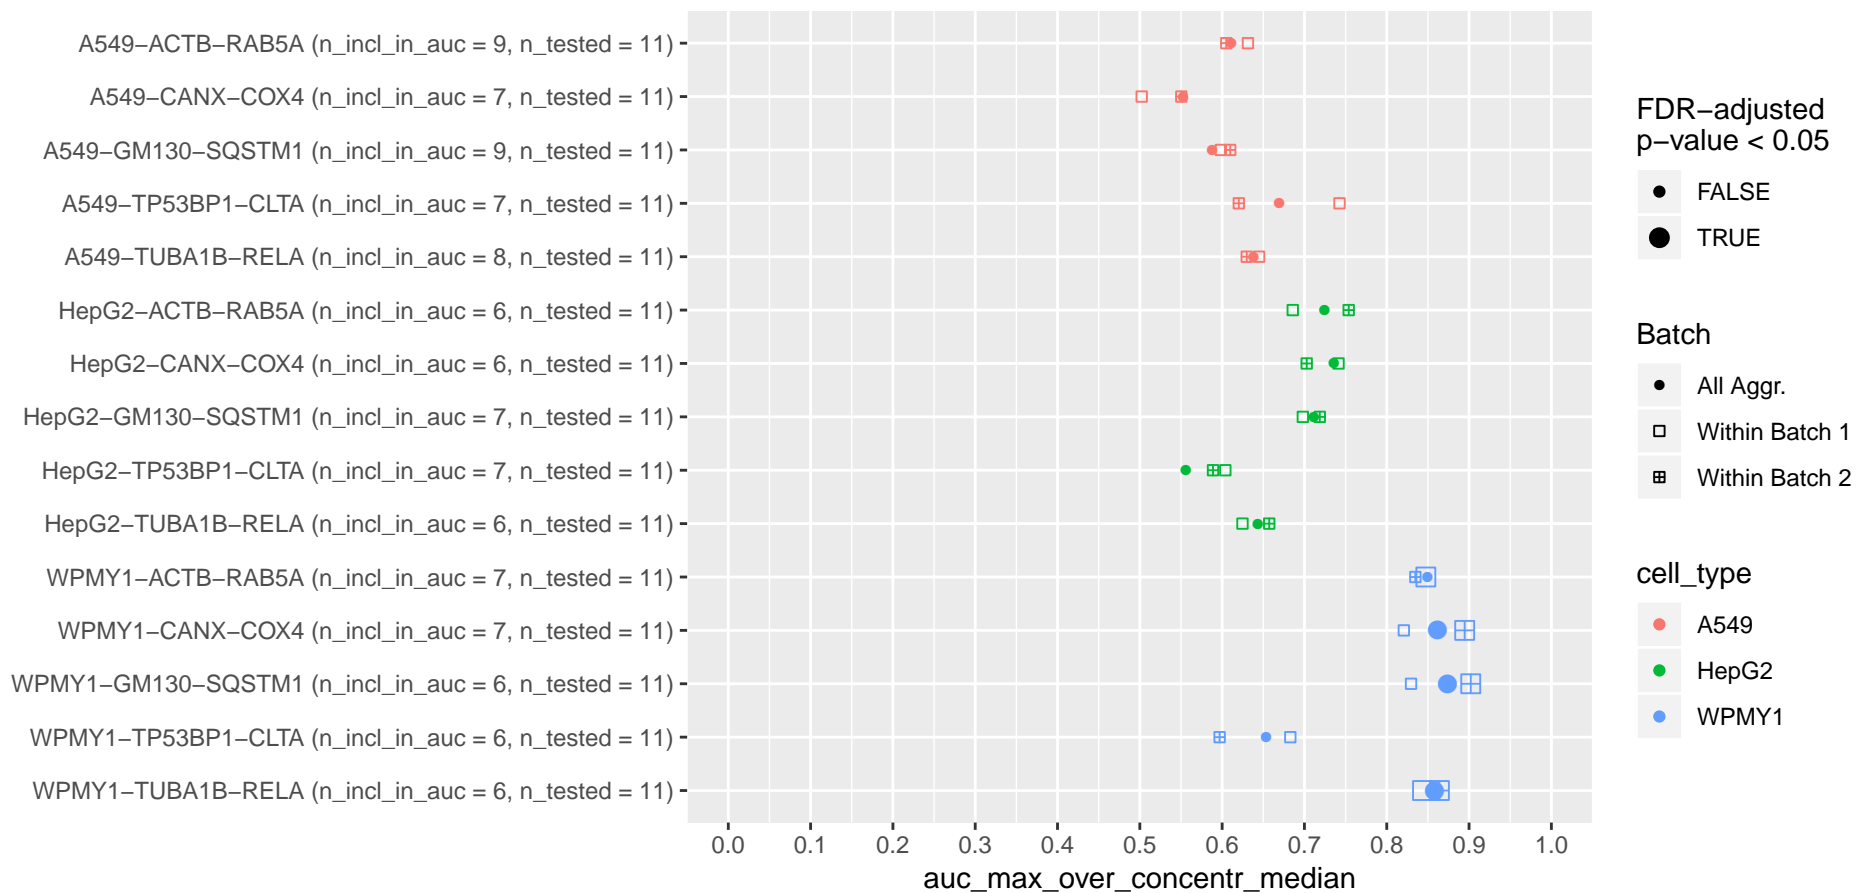

# CDK<sup>in</sup>hibitor

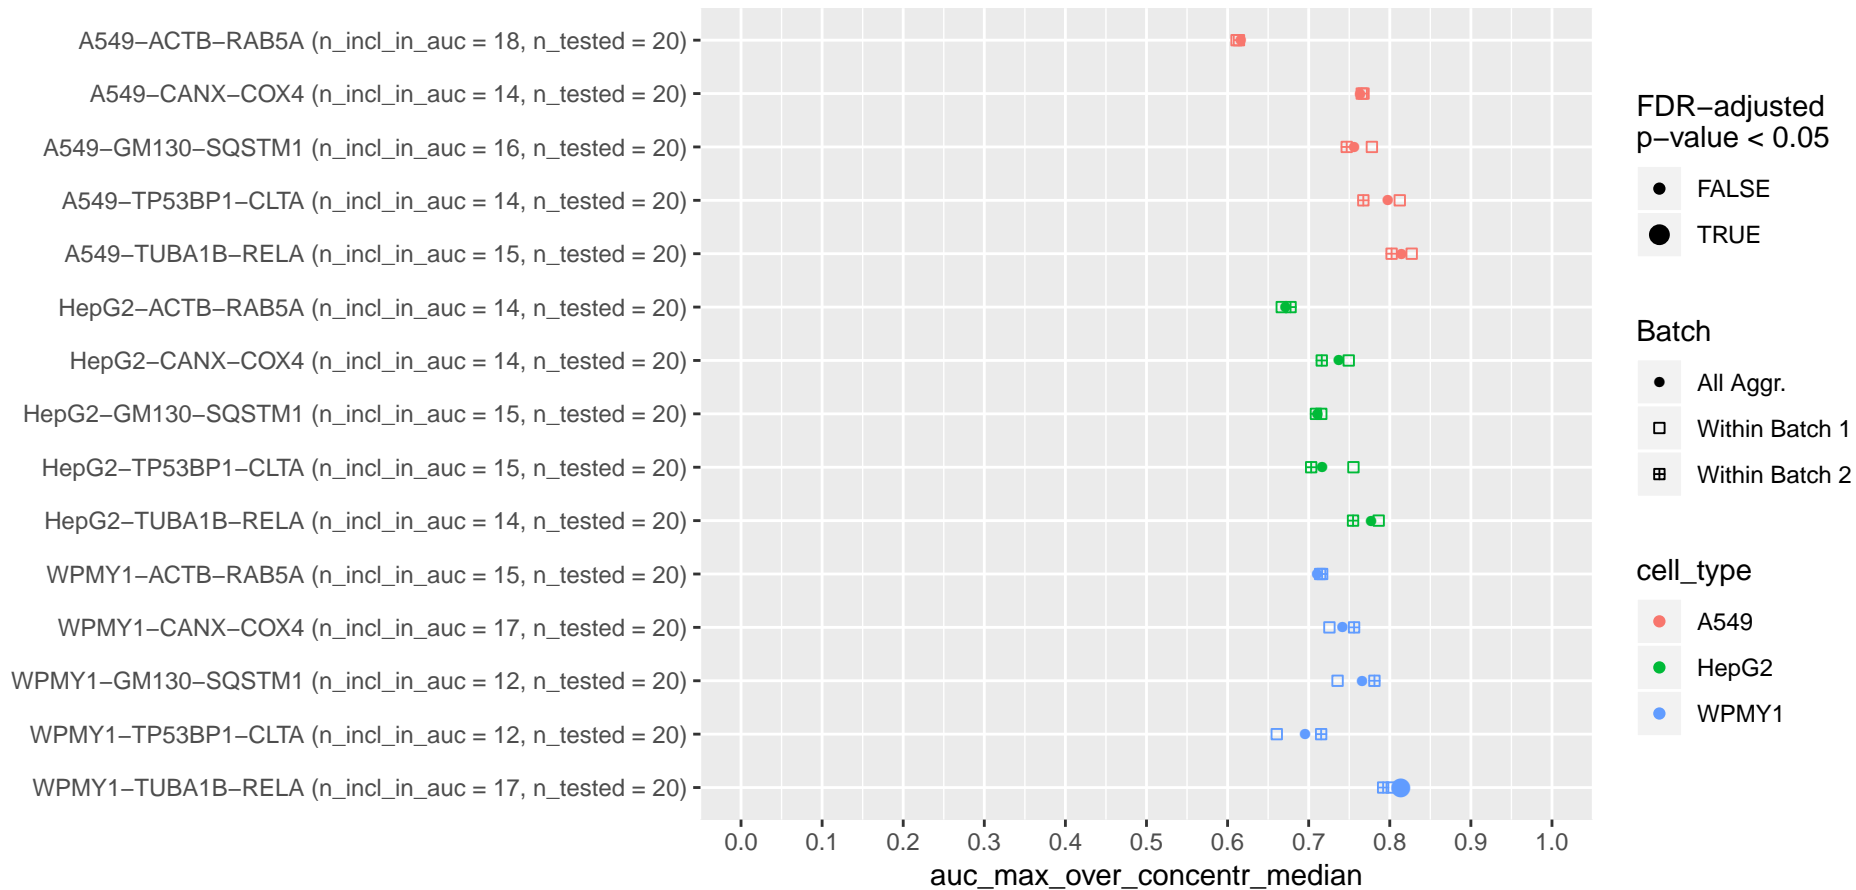

# Calmodulin^antagonist

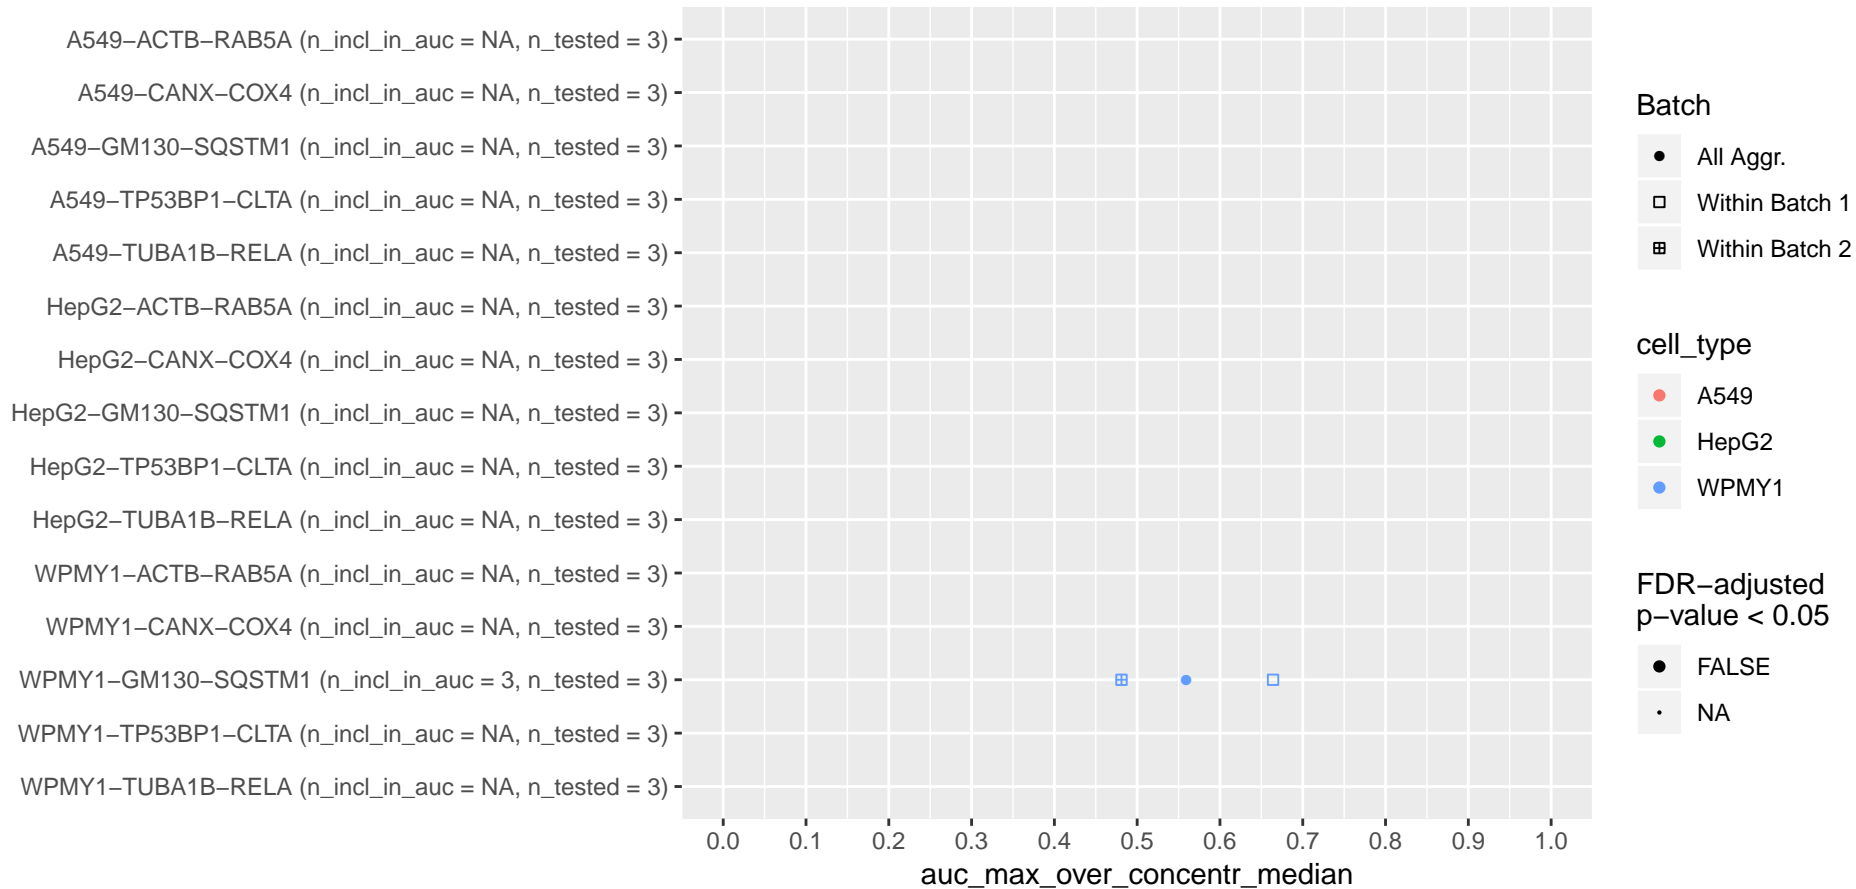



# Casein kinase 1<sup>inhibitor</sup>

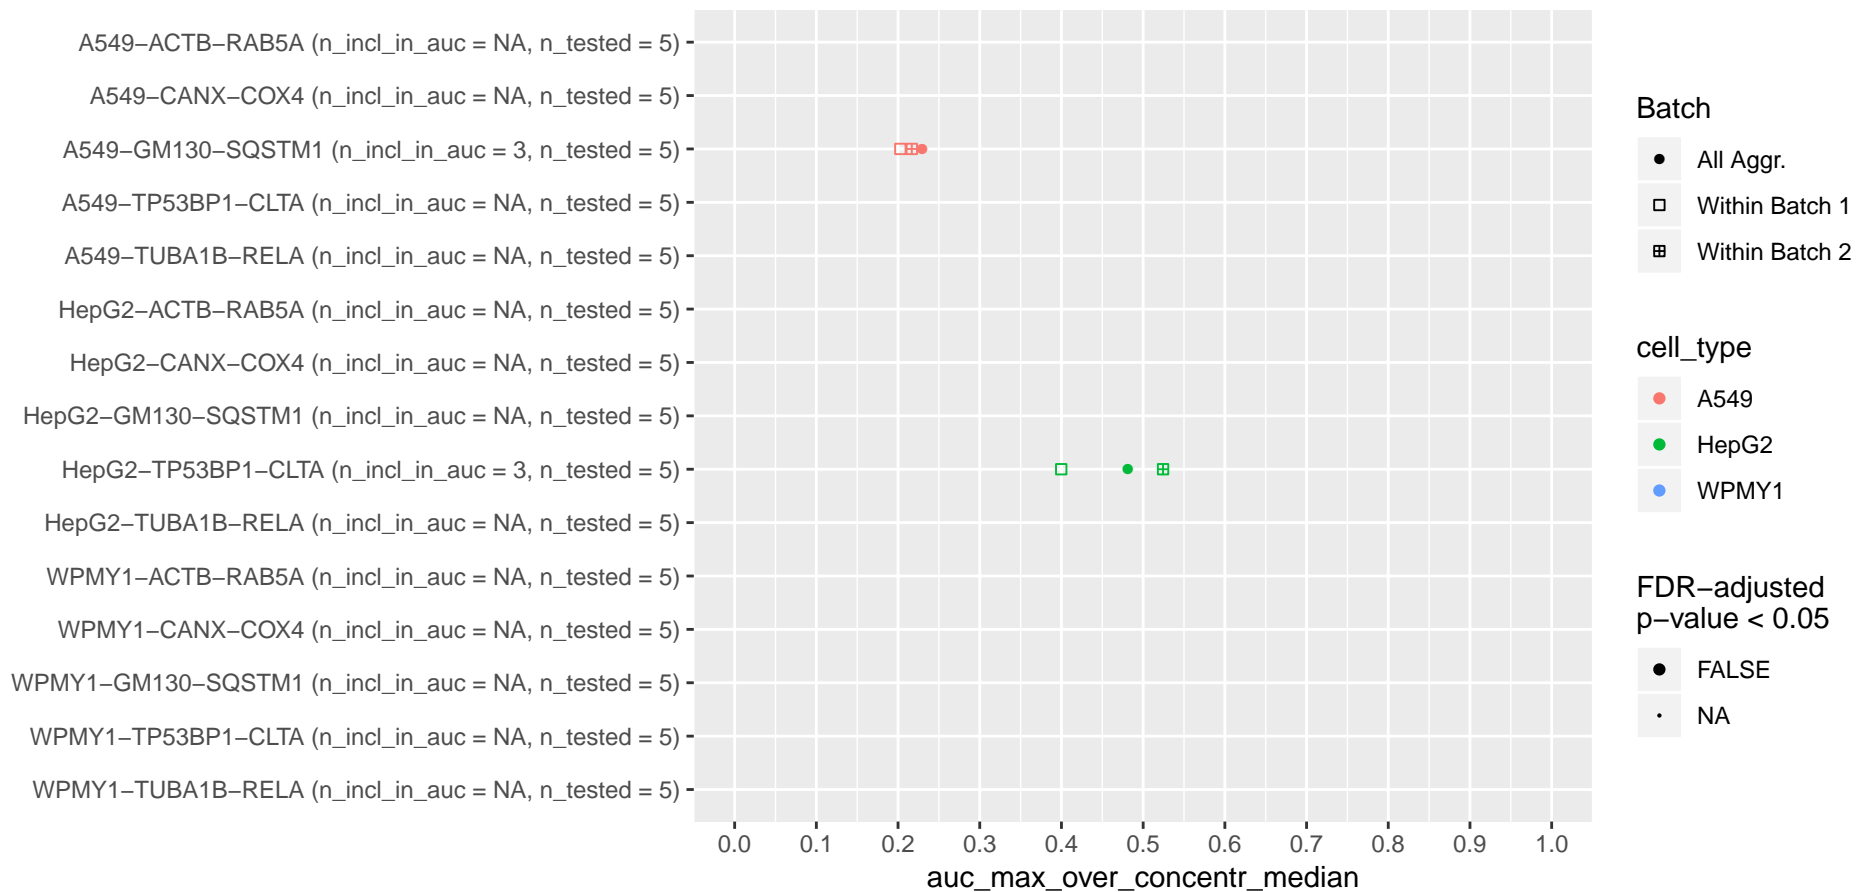

# Checkpoint kinase<sup>in</sup>inhibitor

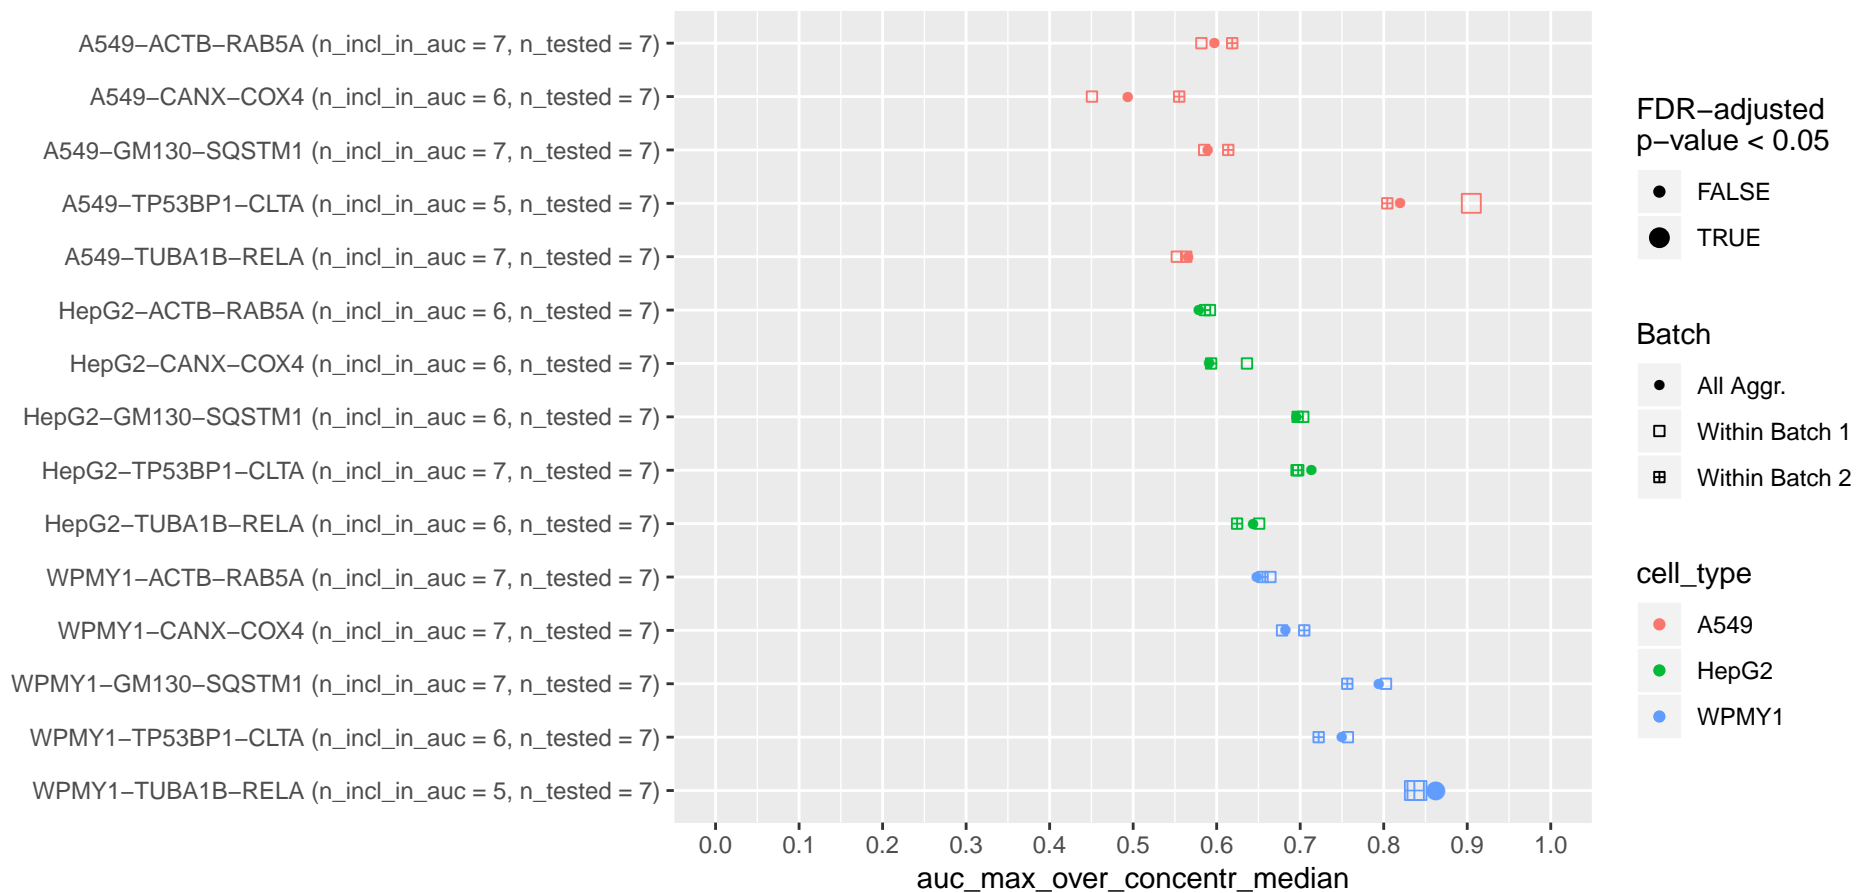

# Cytochrome P450<sup>1</sup>inhibitor

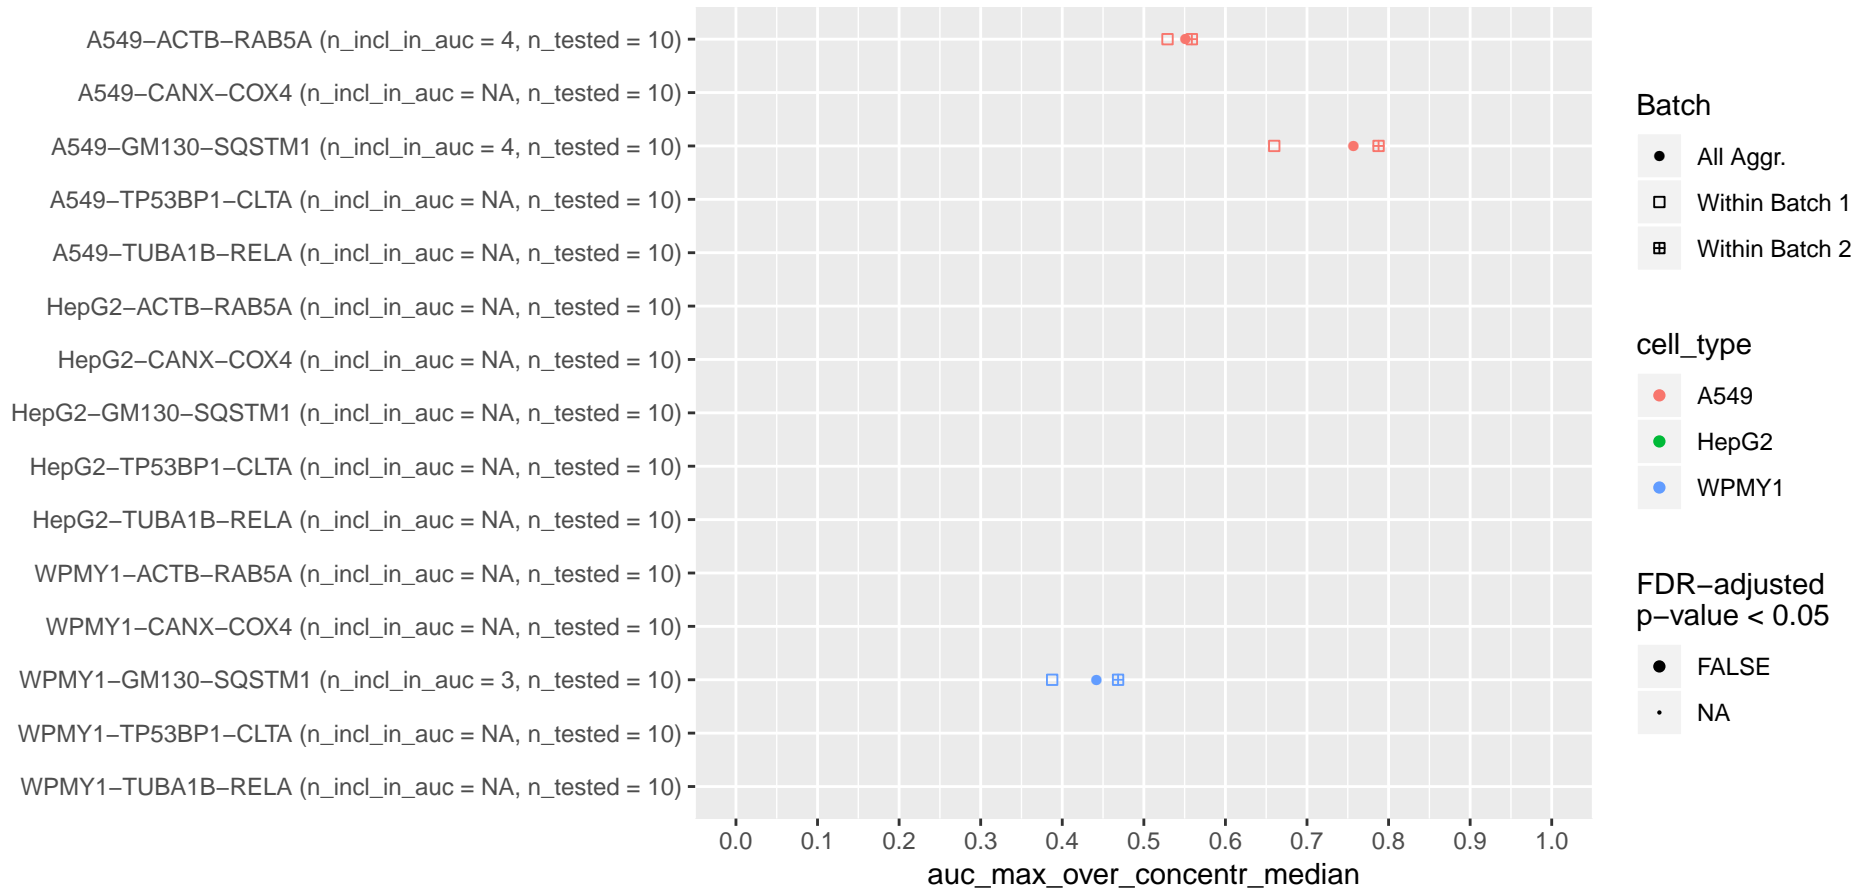

# DNA synthesis<sup>inhibitor</sup>

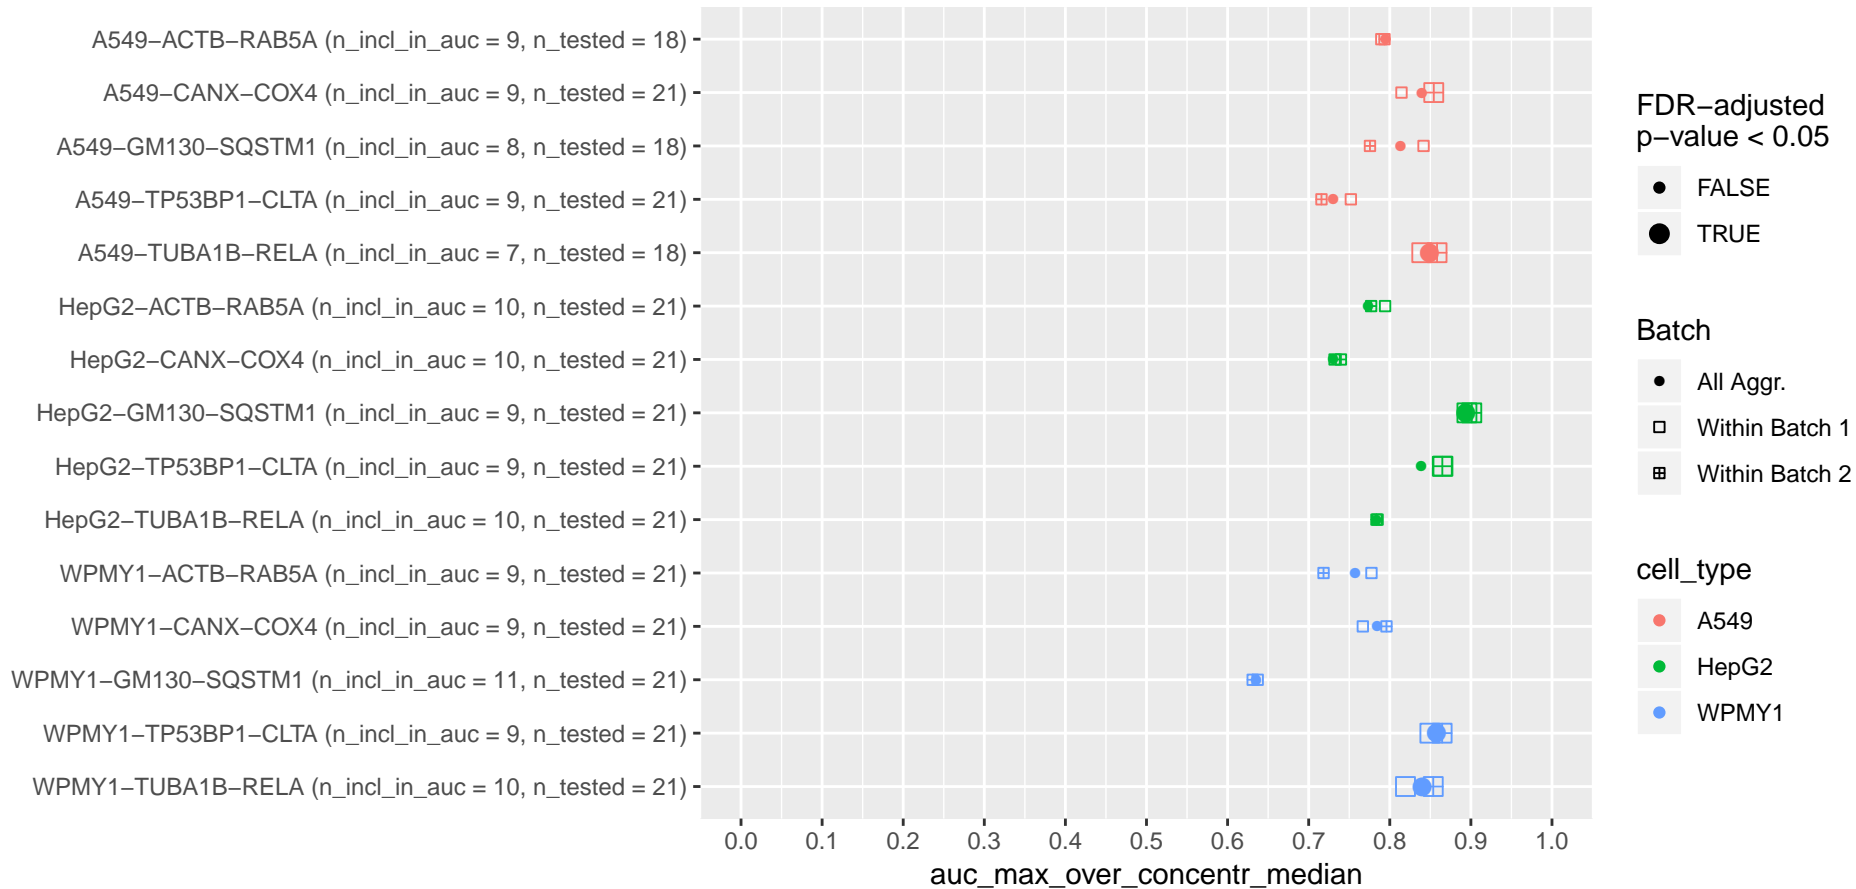

# DNA-PK<sup>inhibitor</sup>

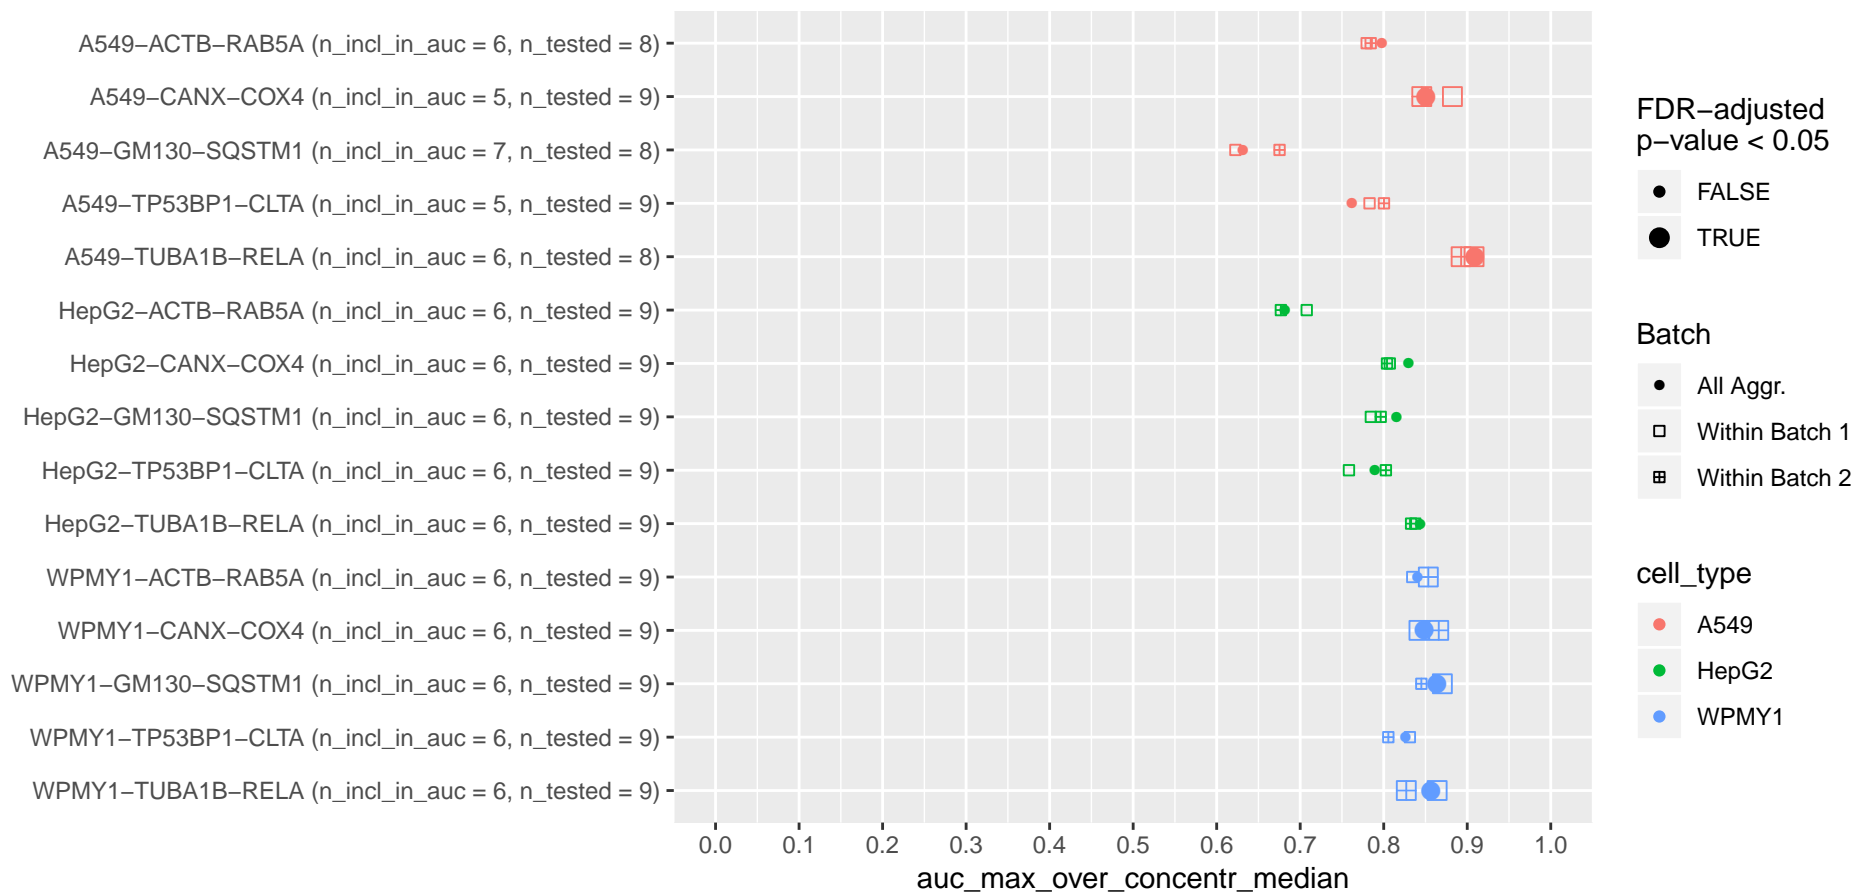

# Dopamine receptor^agonist

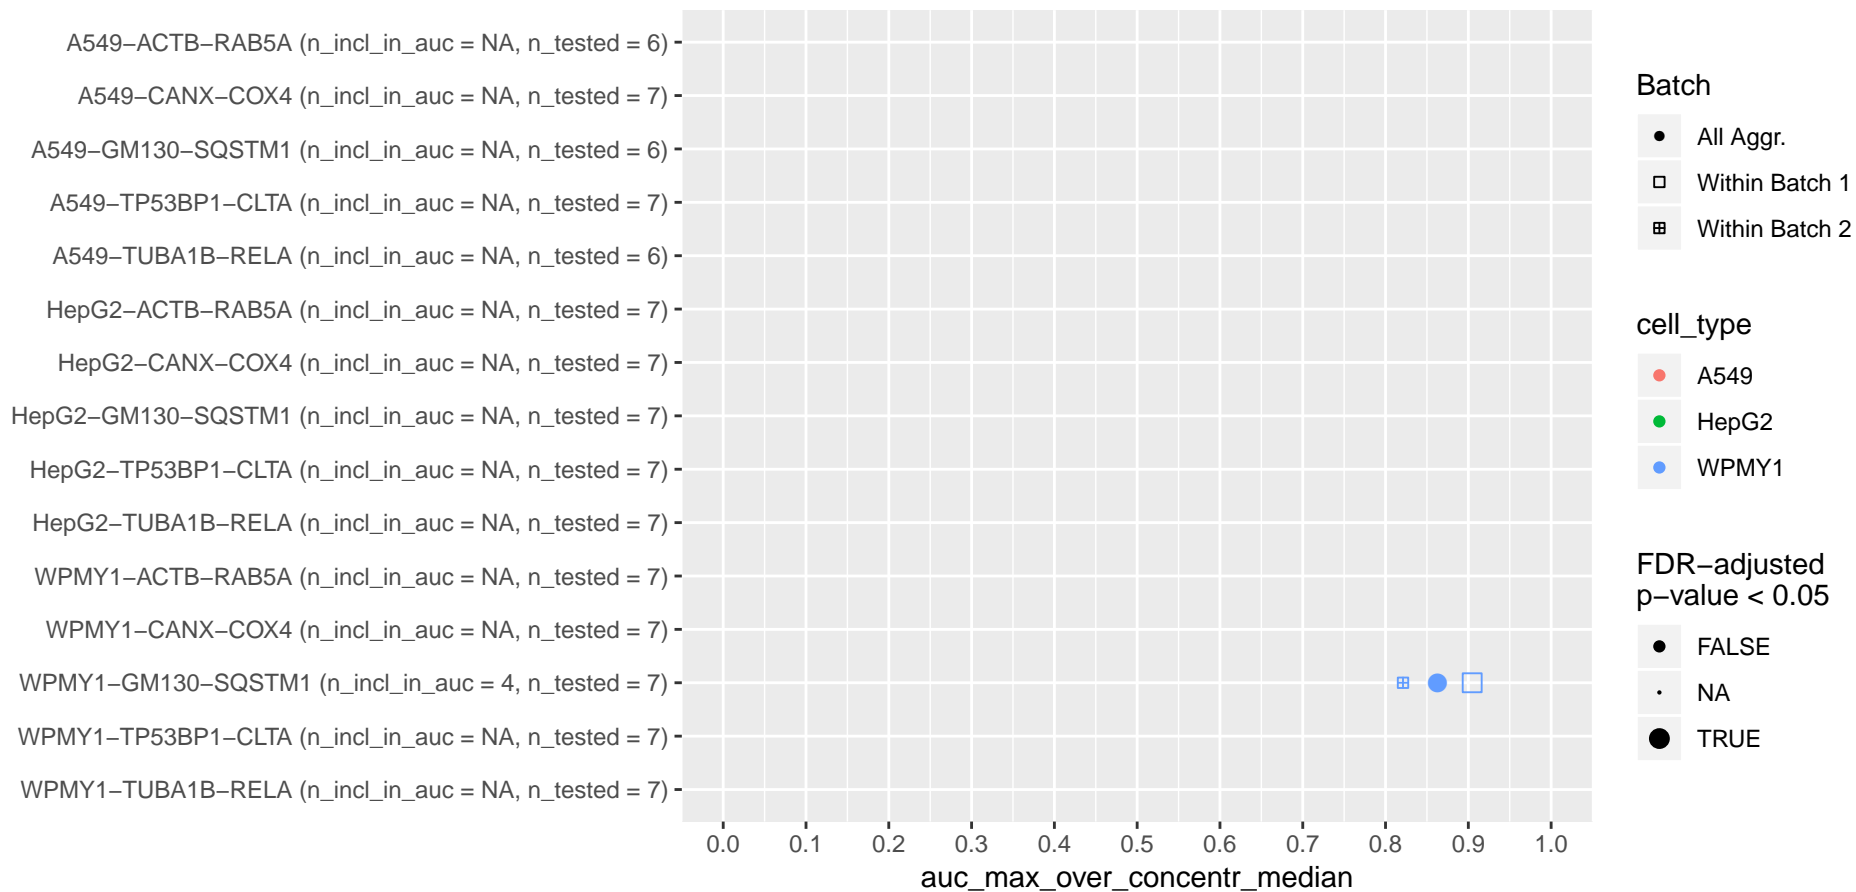

# Dopamine receptor^antagonist

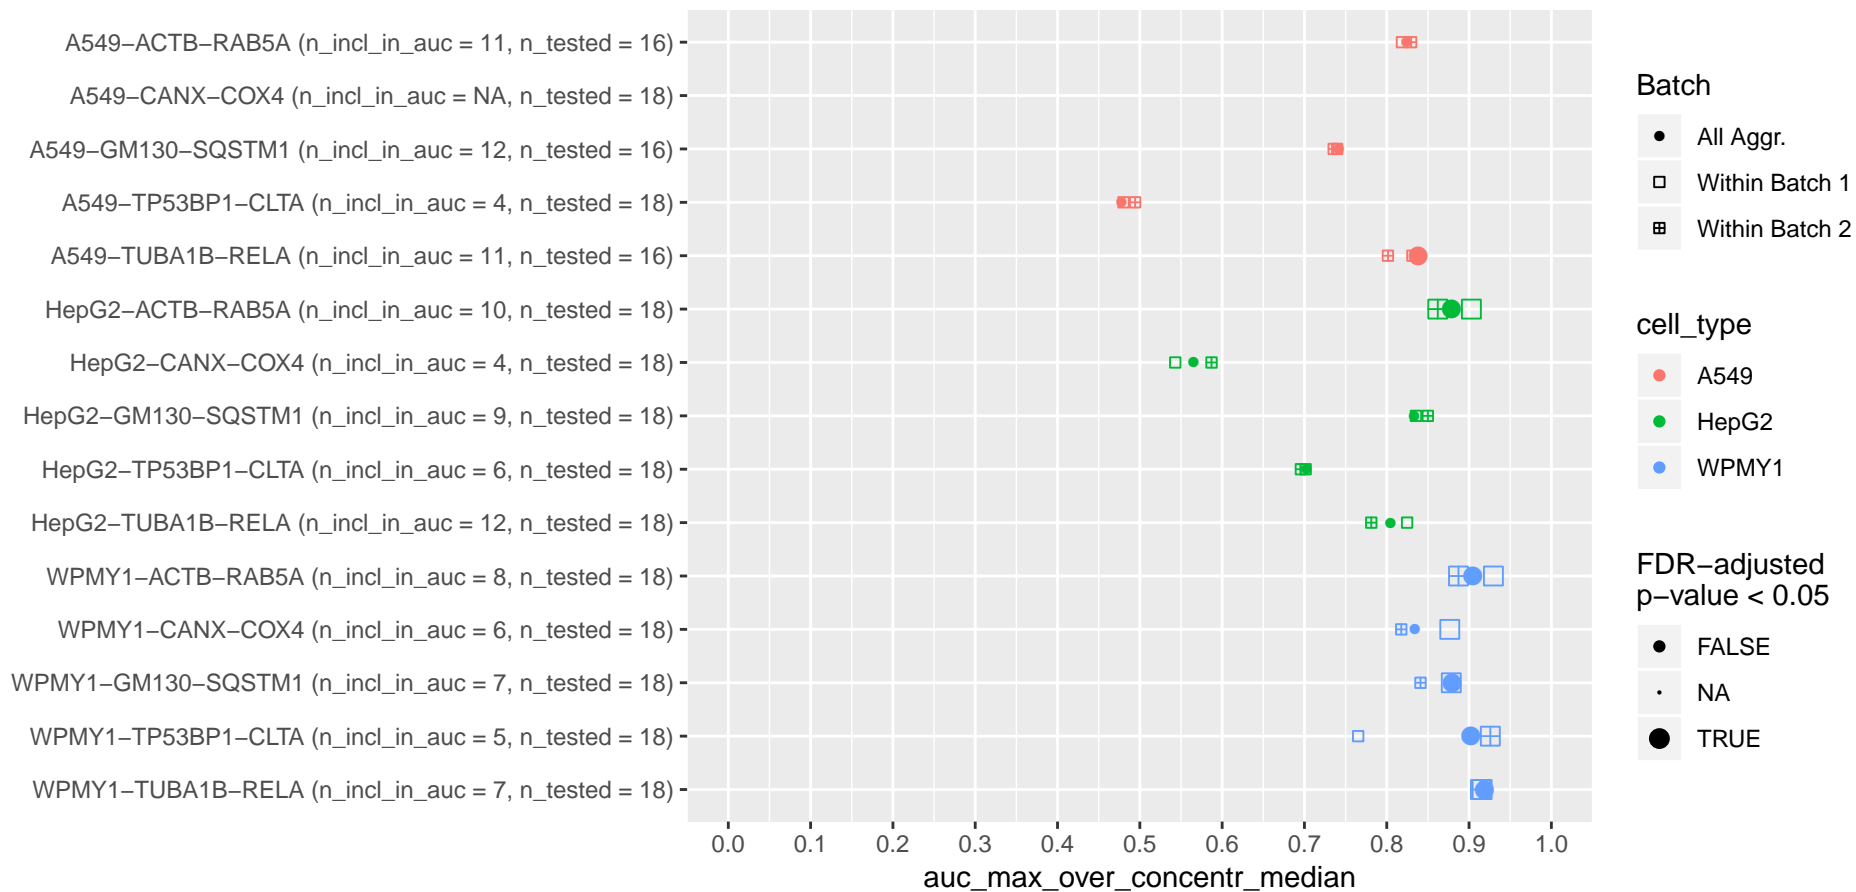

# ErbB family^inhibitor

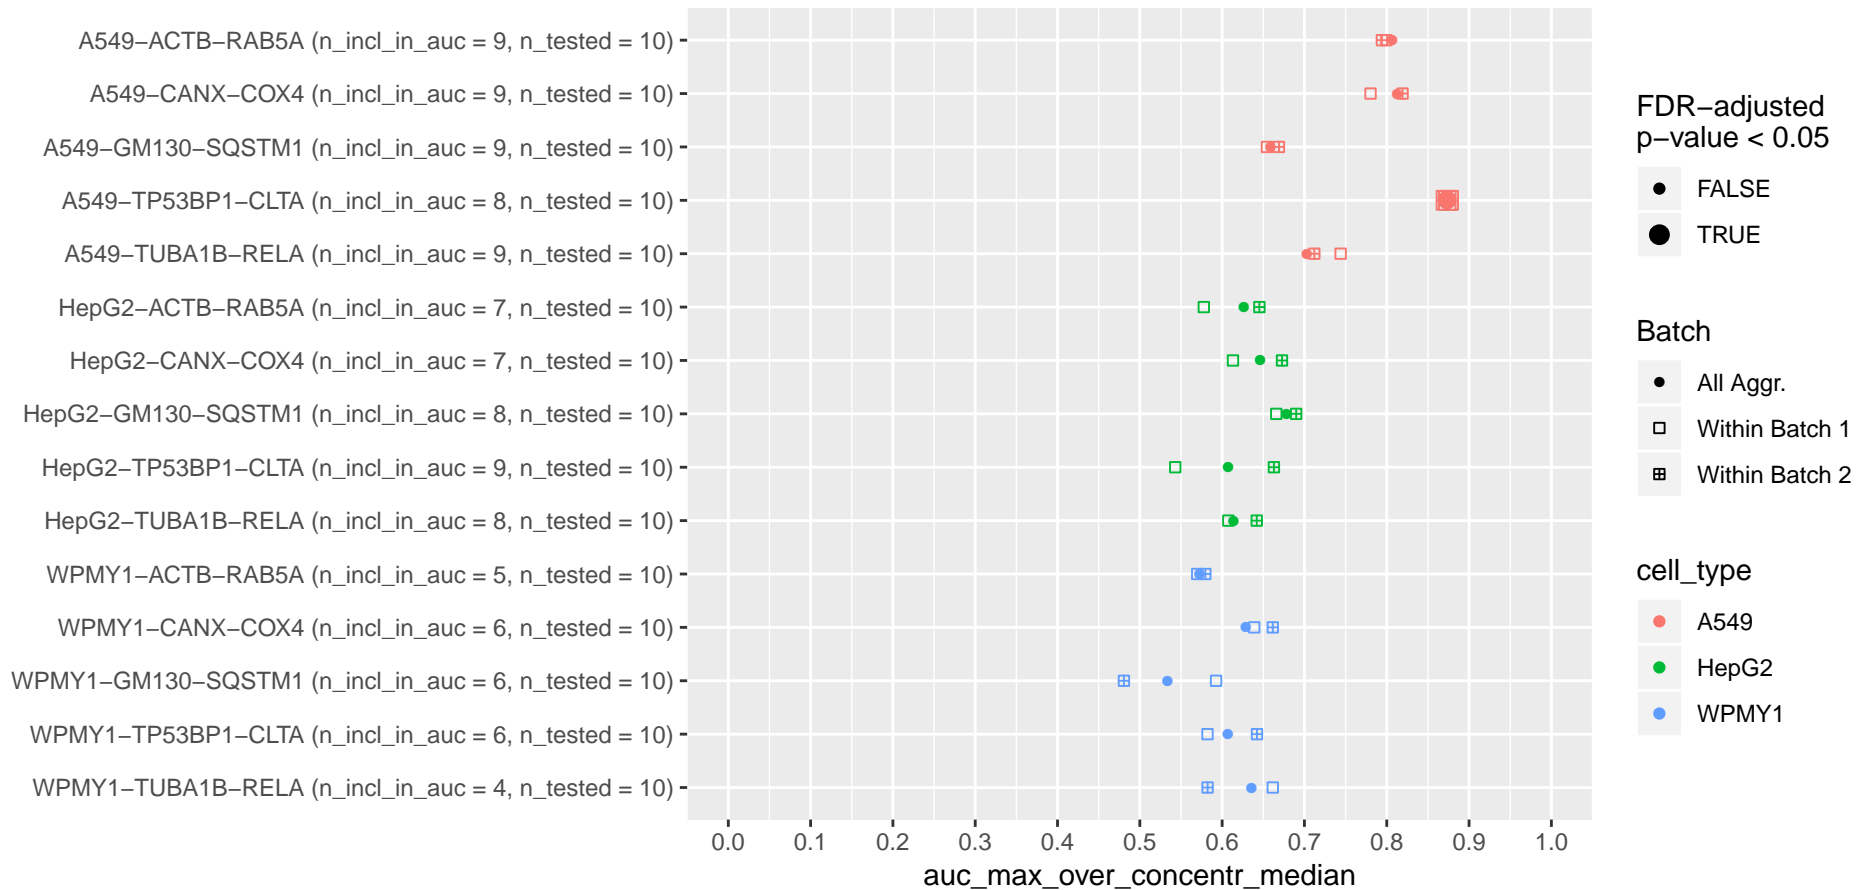



# FAAH<sup>inhibitor</sup>

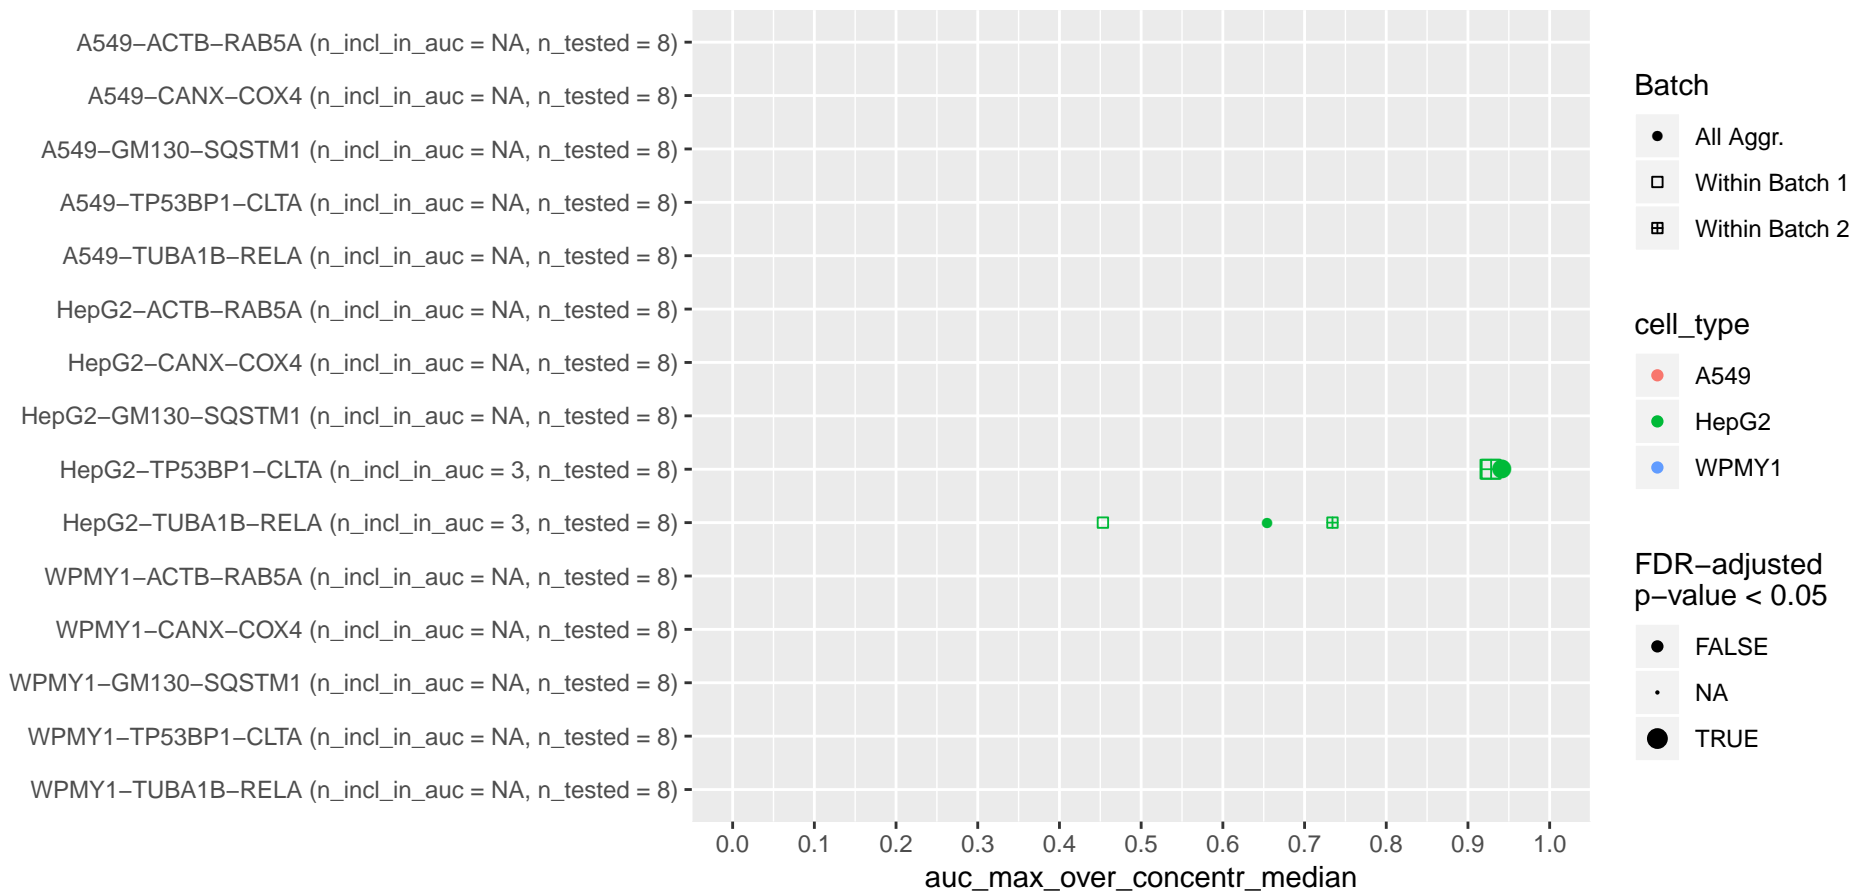

# FGFR family^inhibitor

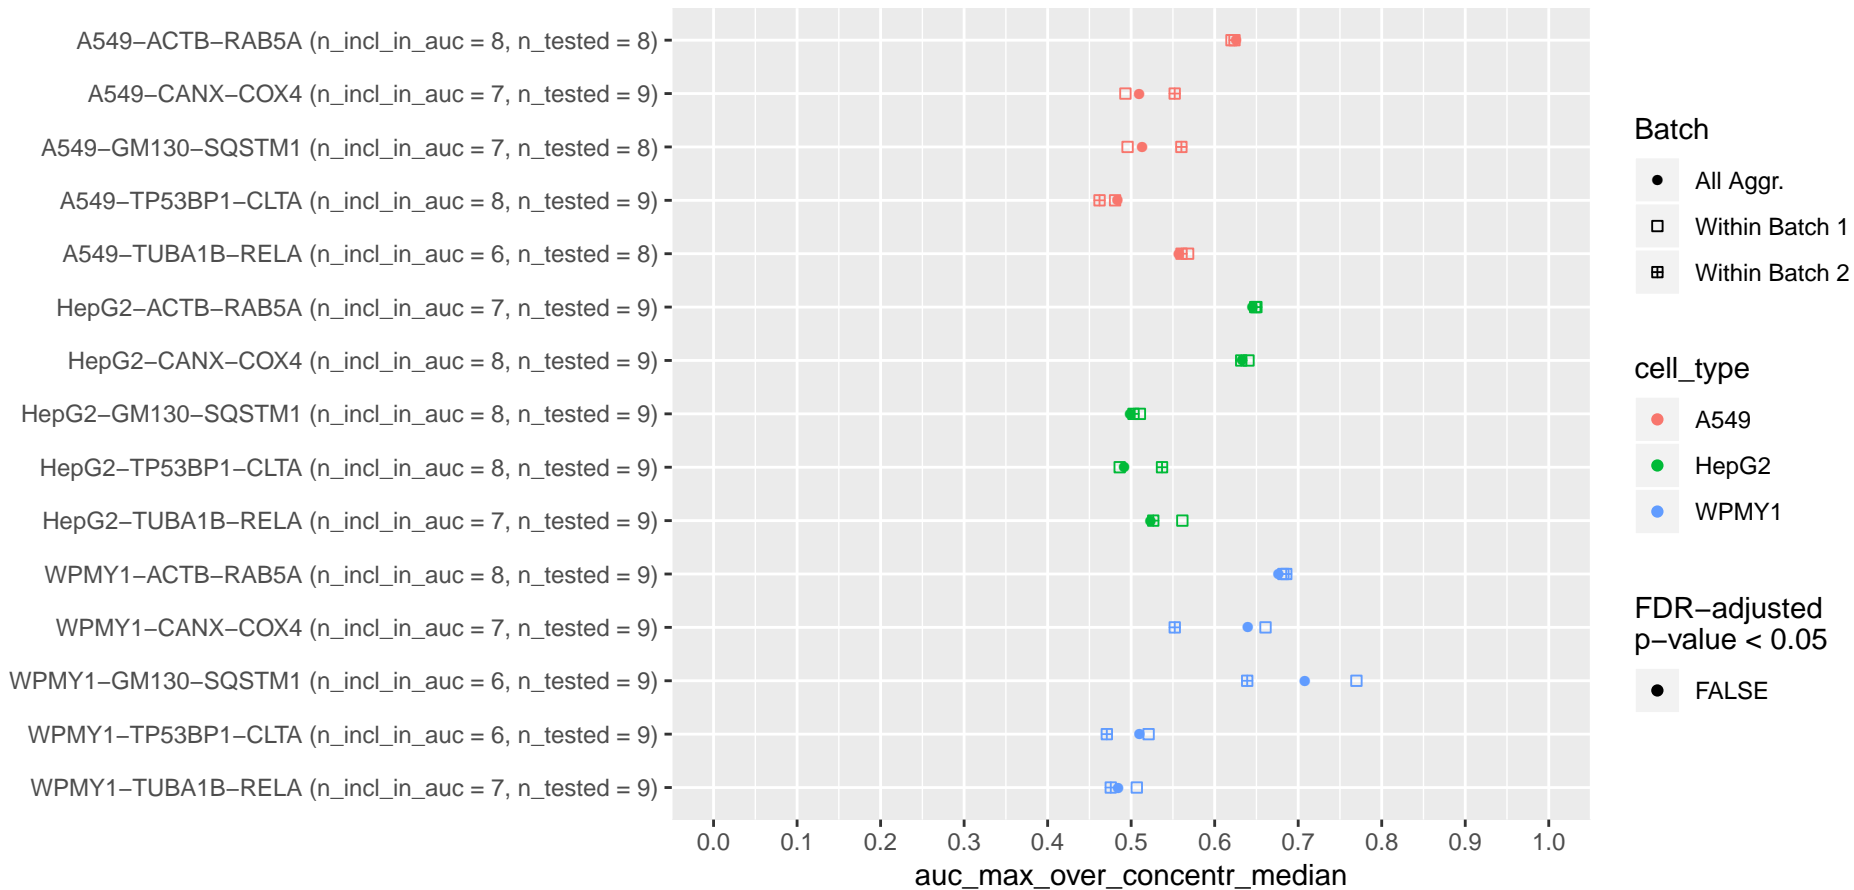

# Glucocorticoid receptor^agonist

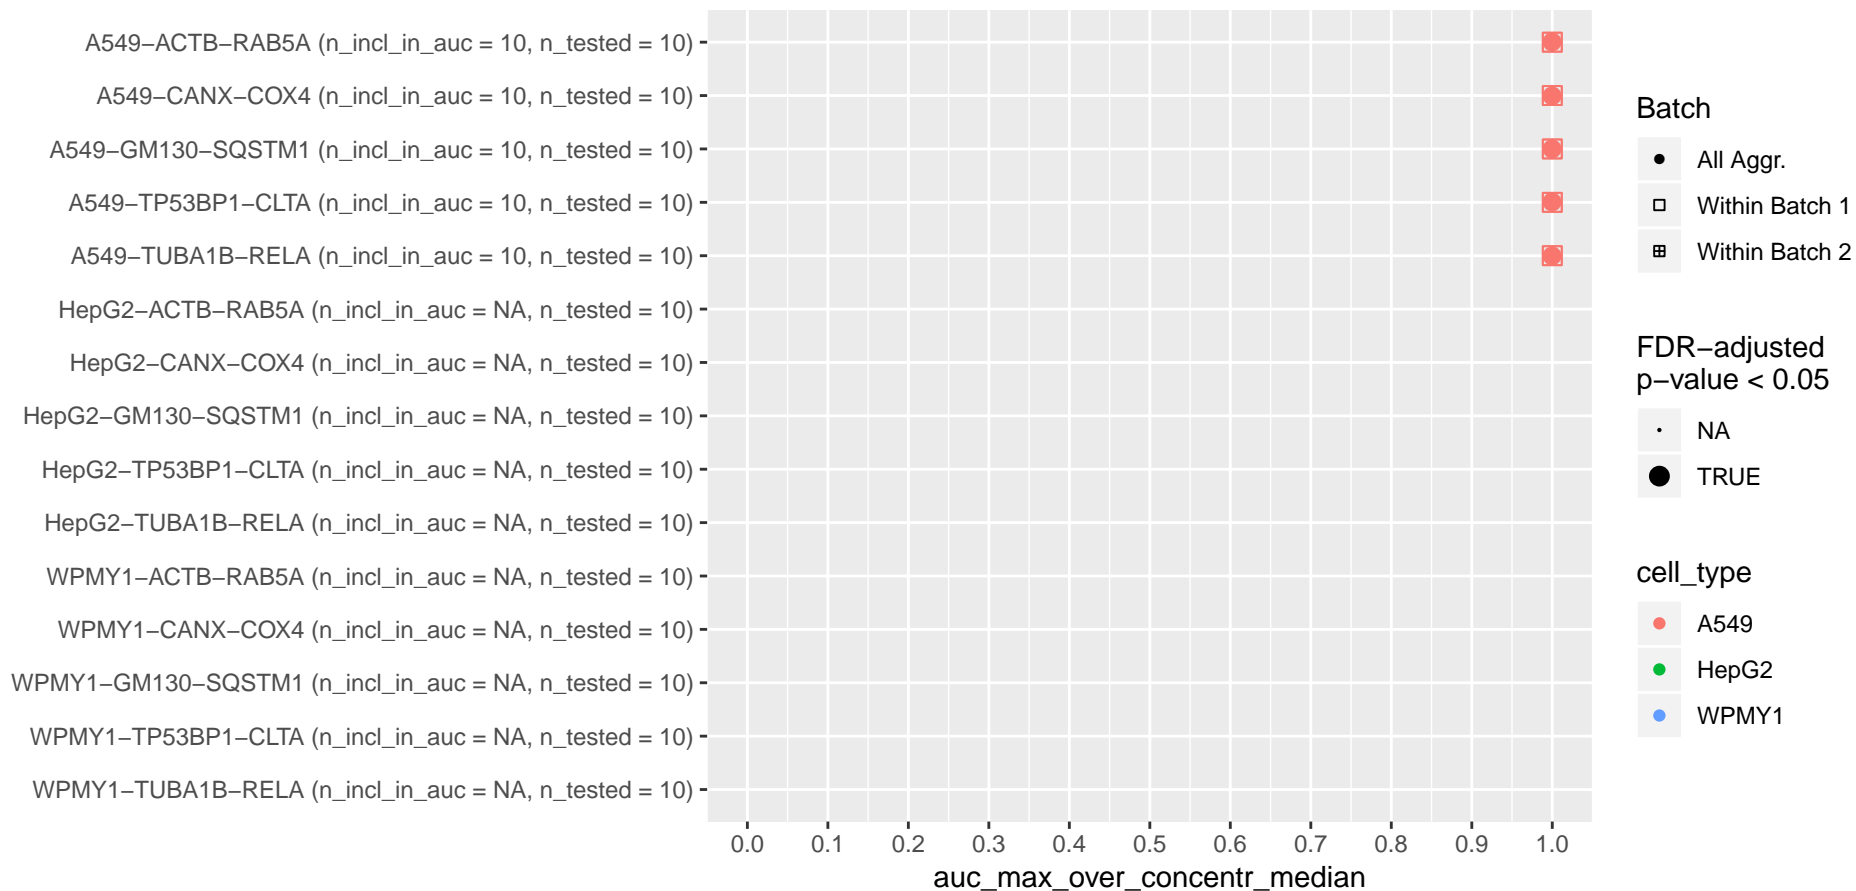

# Glycogen synthase kinase 3<sup>in</sup>hibitor

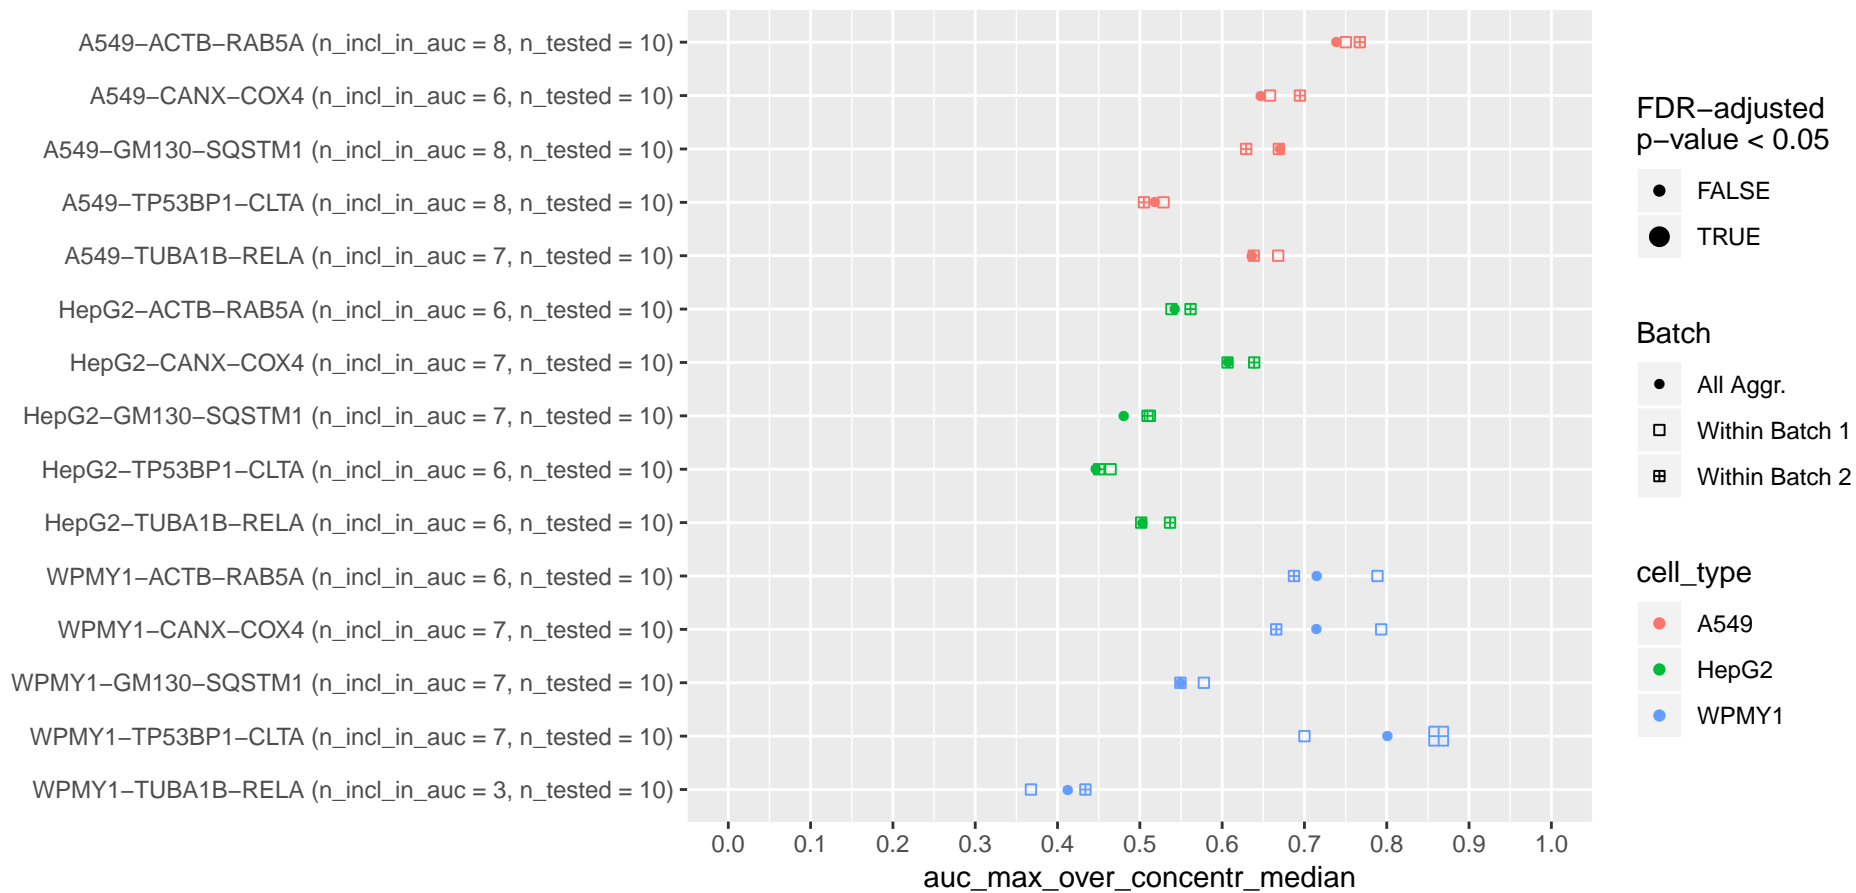

# HDAC<sup>+</sup>inhibitor

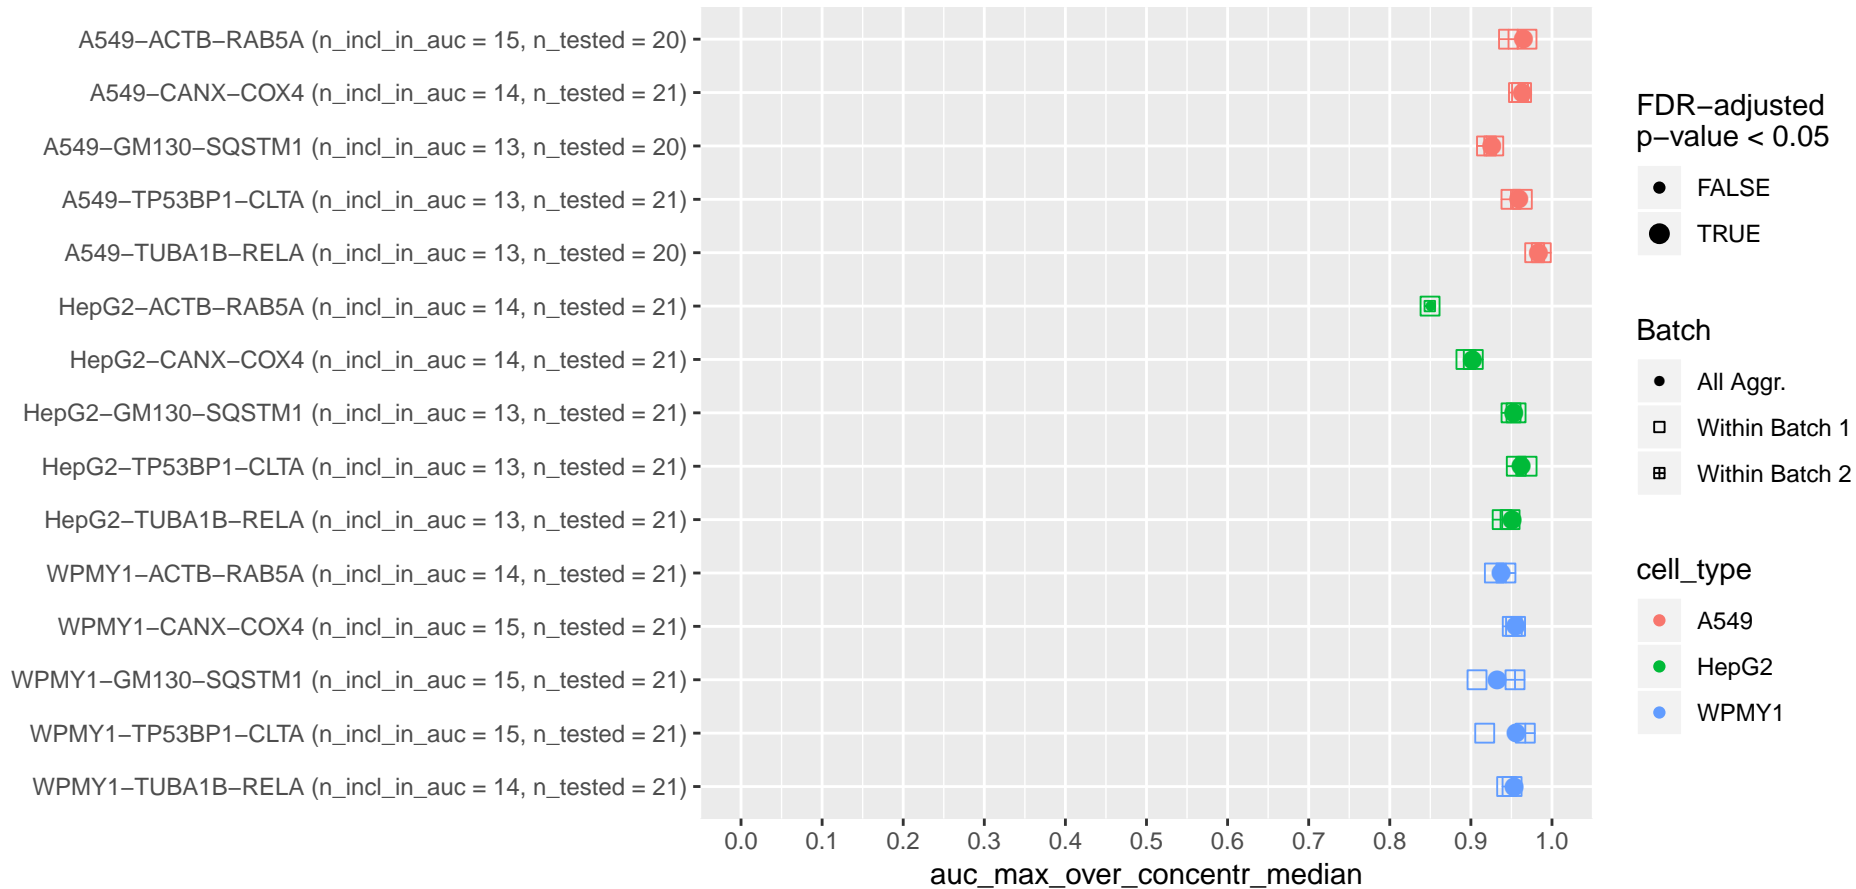

# HGF receptor family^inhibitor

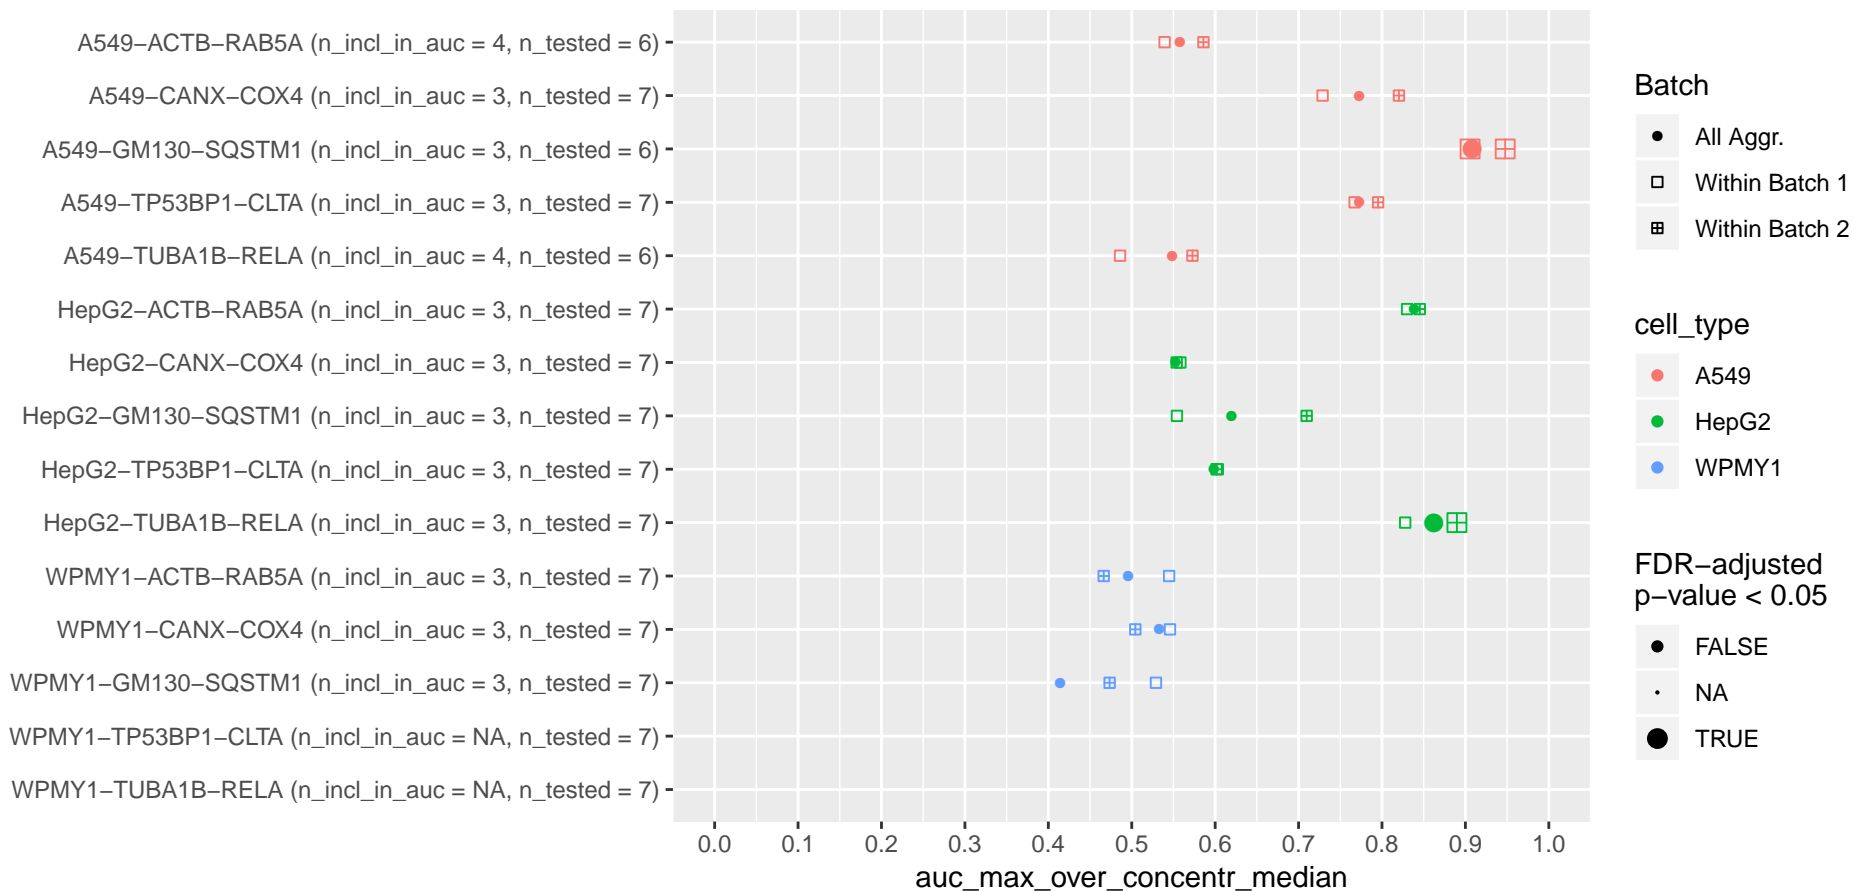

# HIV protease<sup>in</sup>hibitor

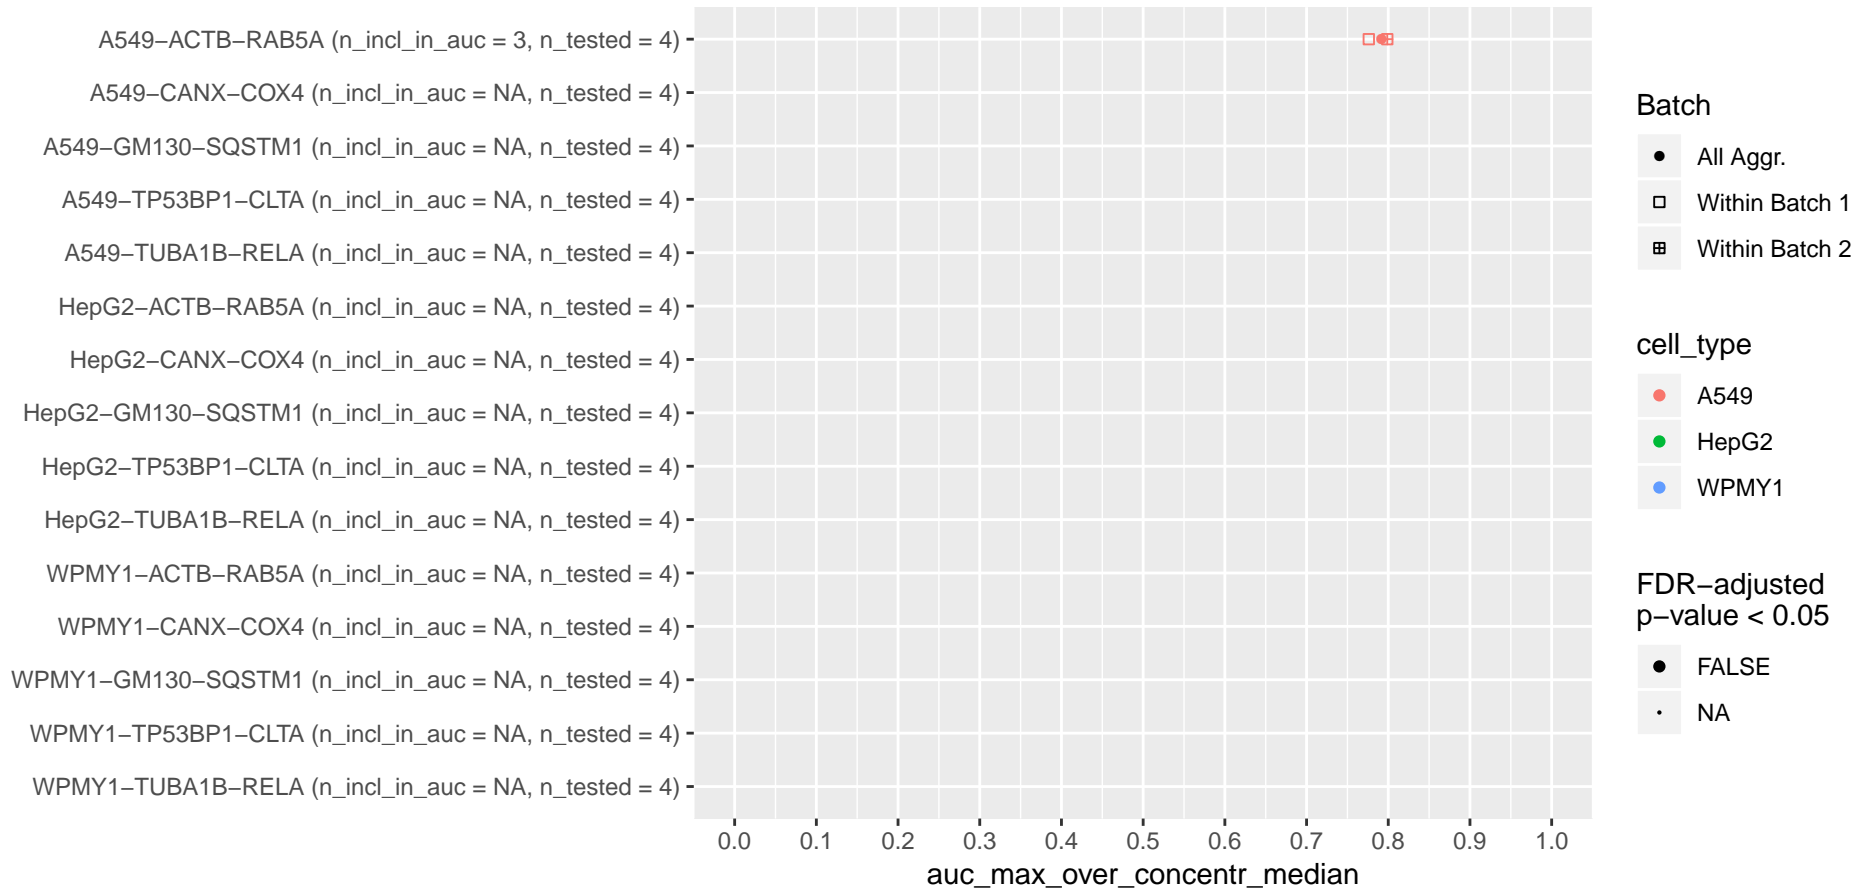

# HMG-CoA reductase<sup>^</sup>inhibitor

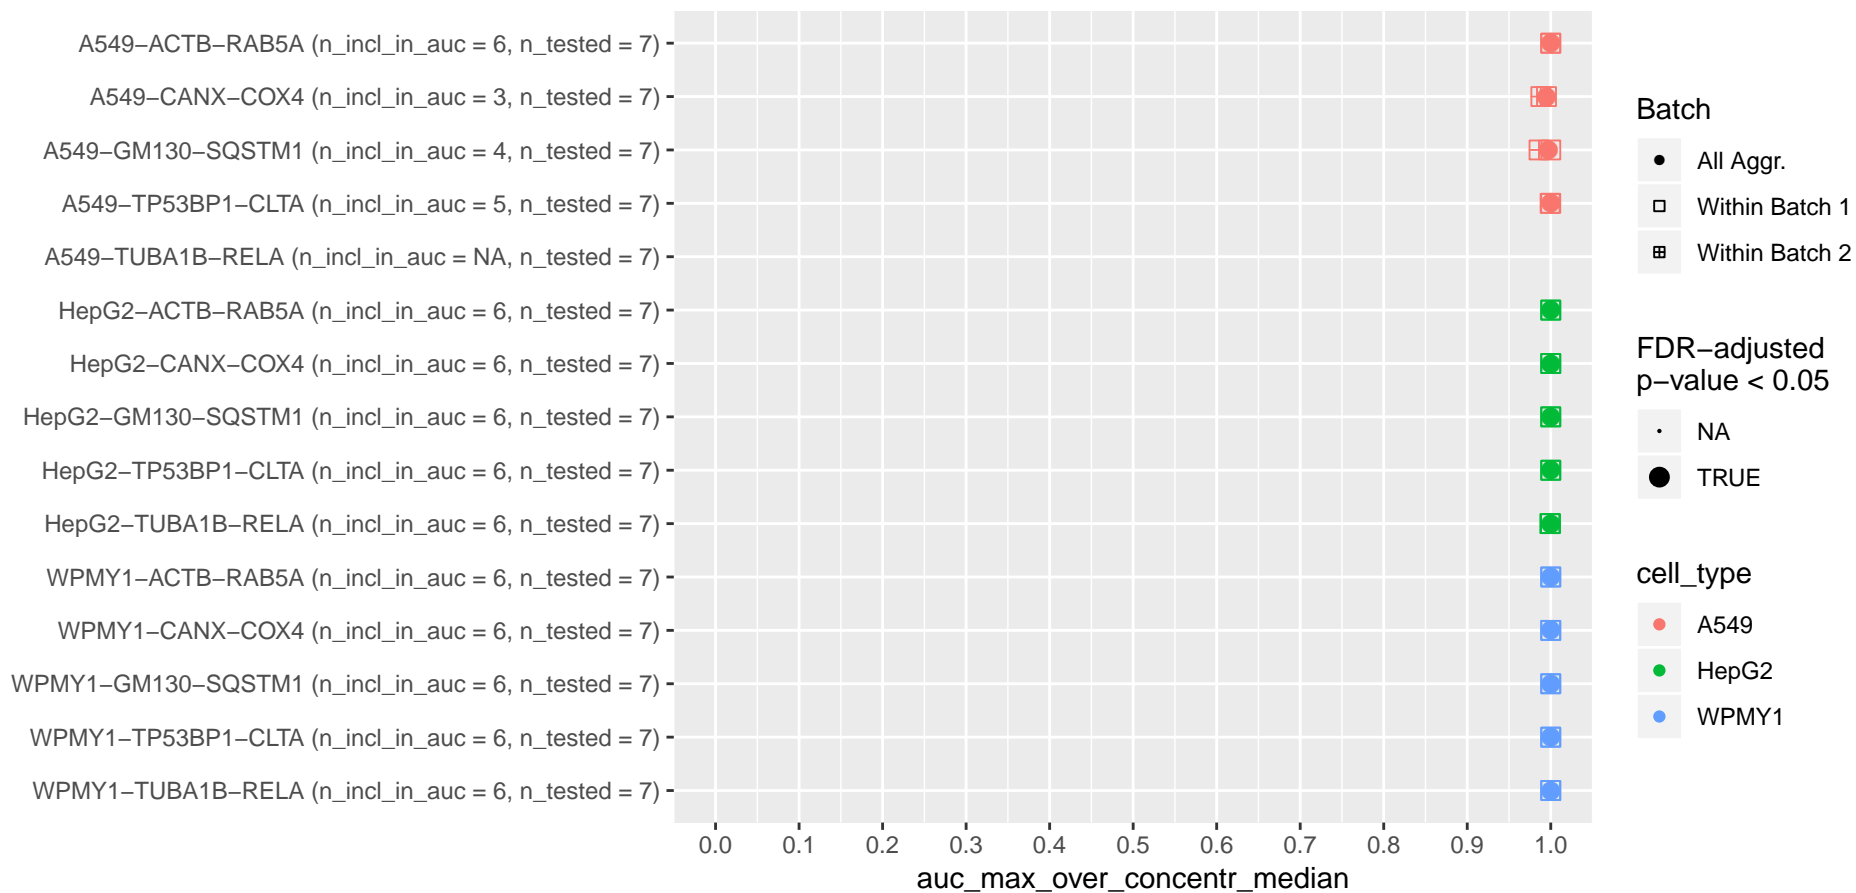



# Heat shock protein<sup>inhibitor</sup>

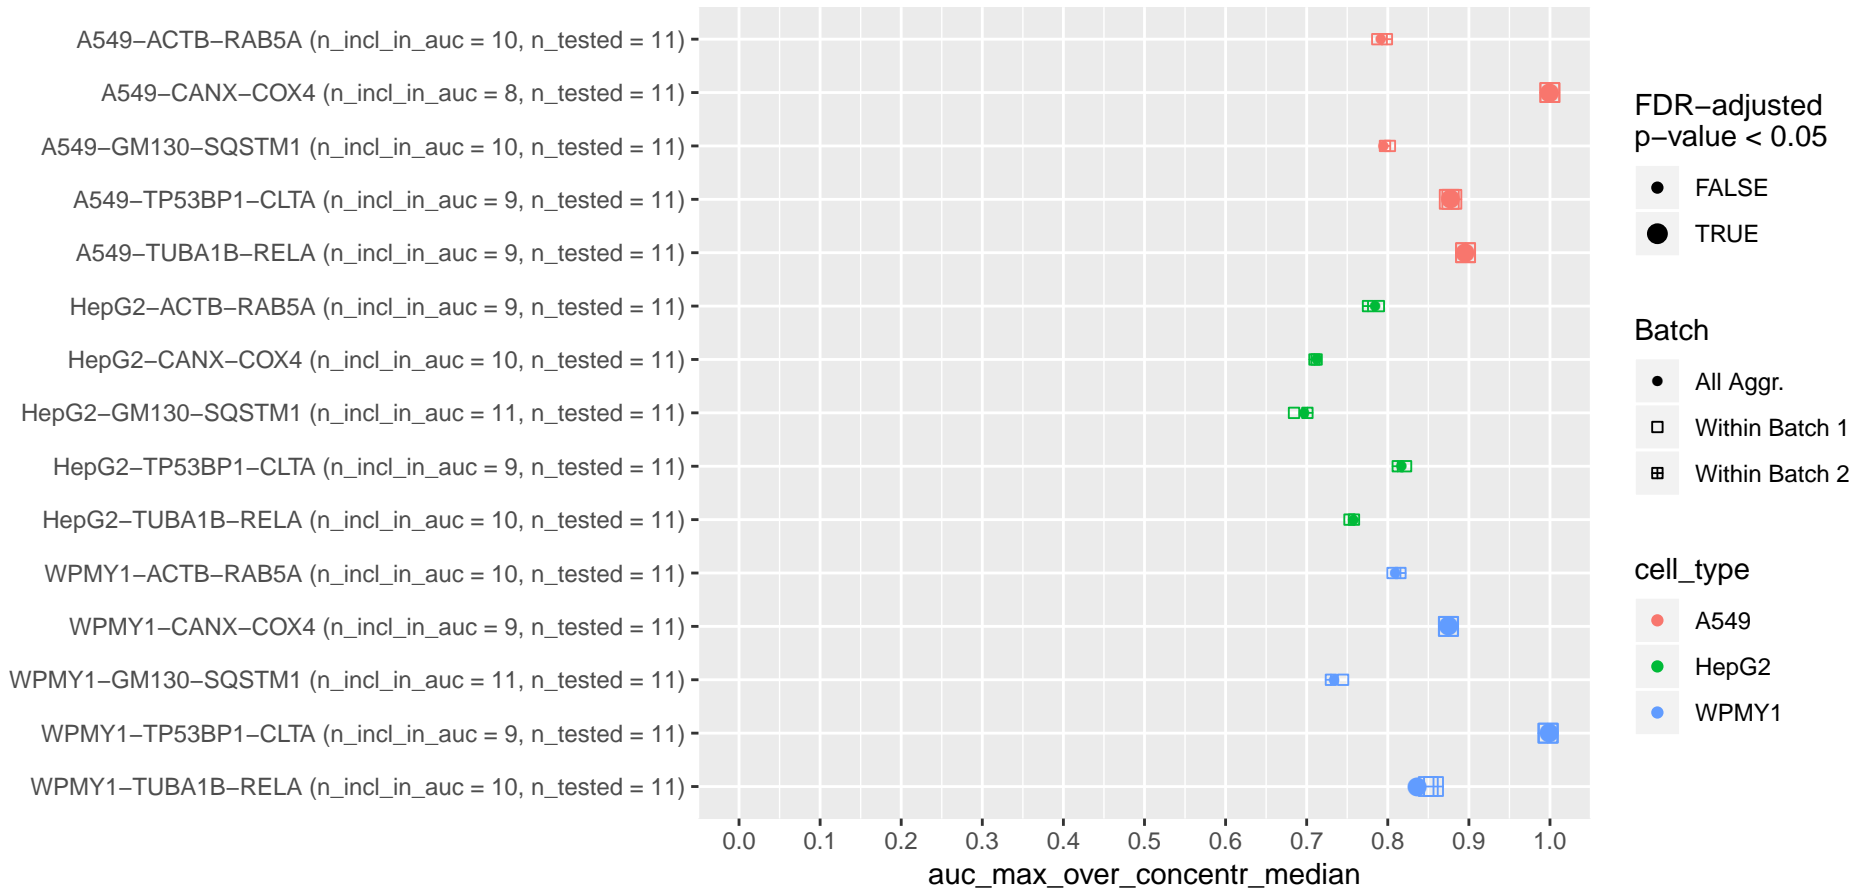

# Histamine receptor^antagonist

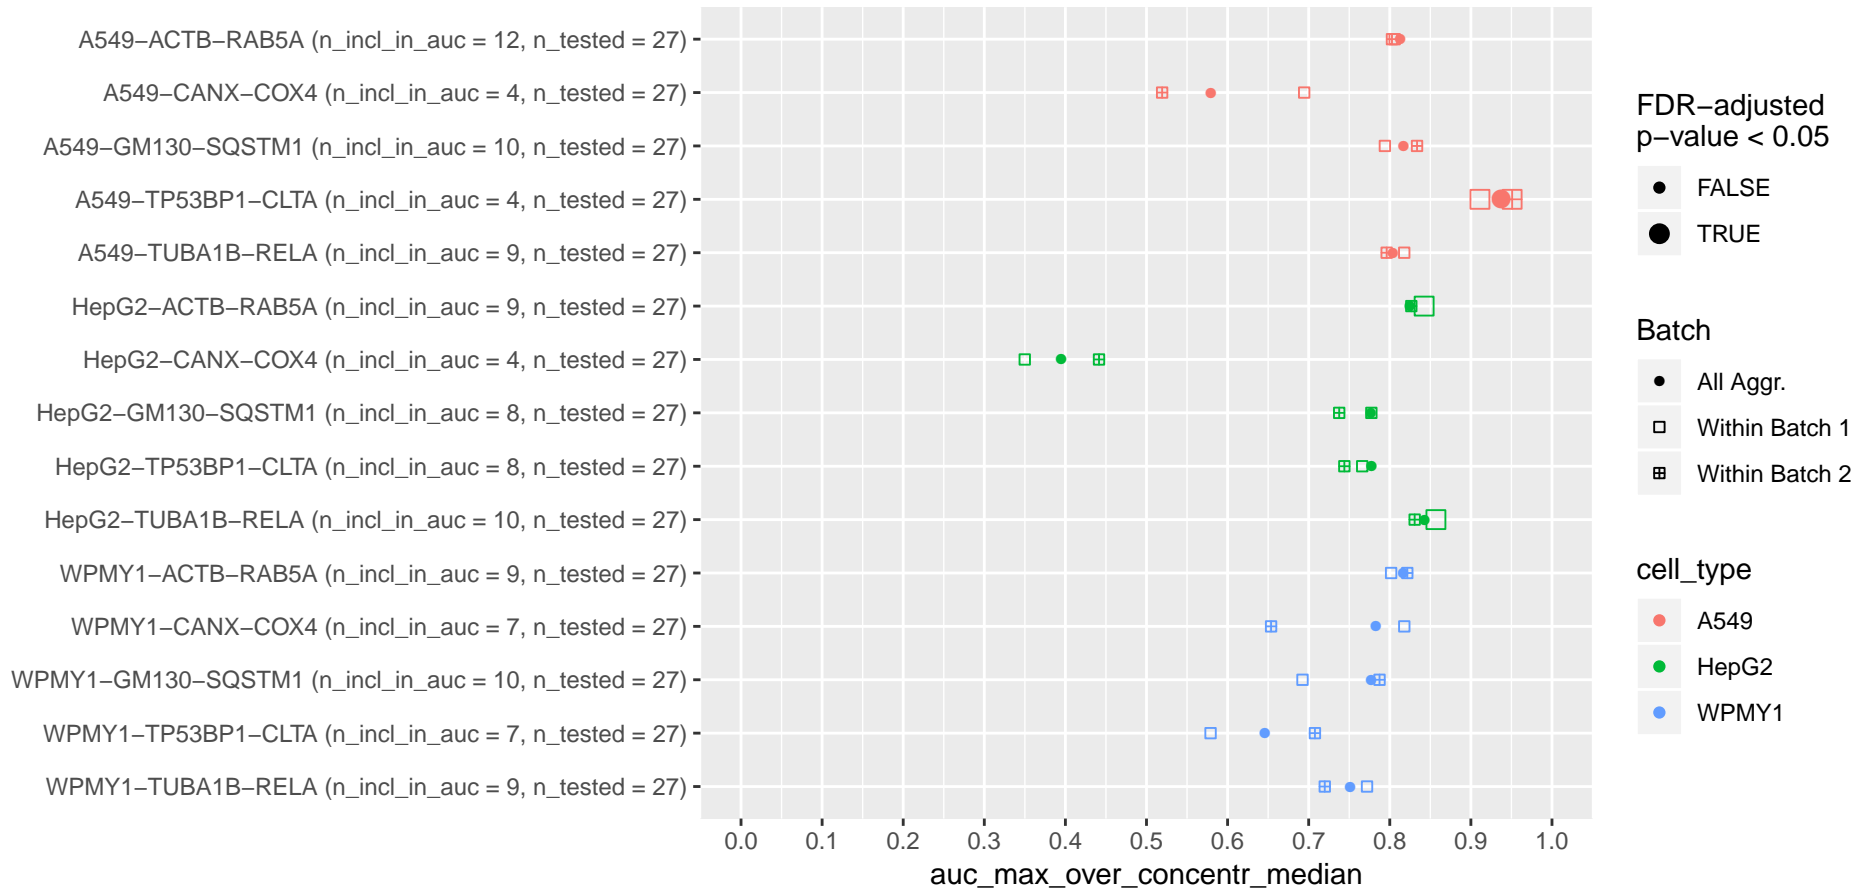

# Histone demethylase<sup>inhibitor</sup>

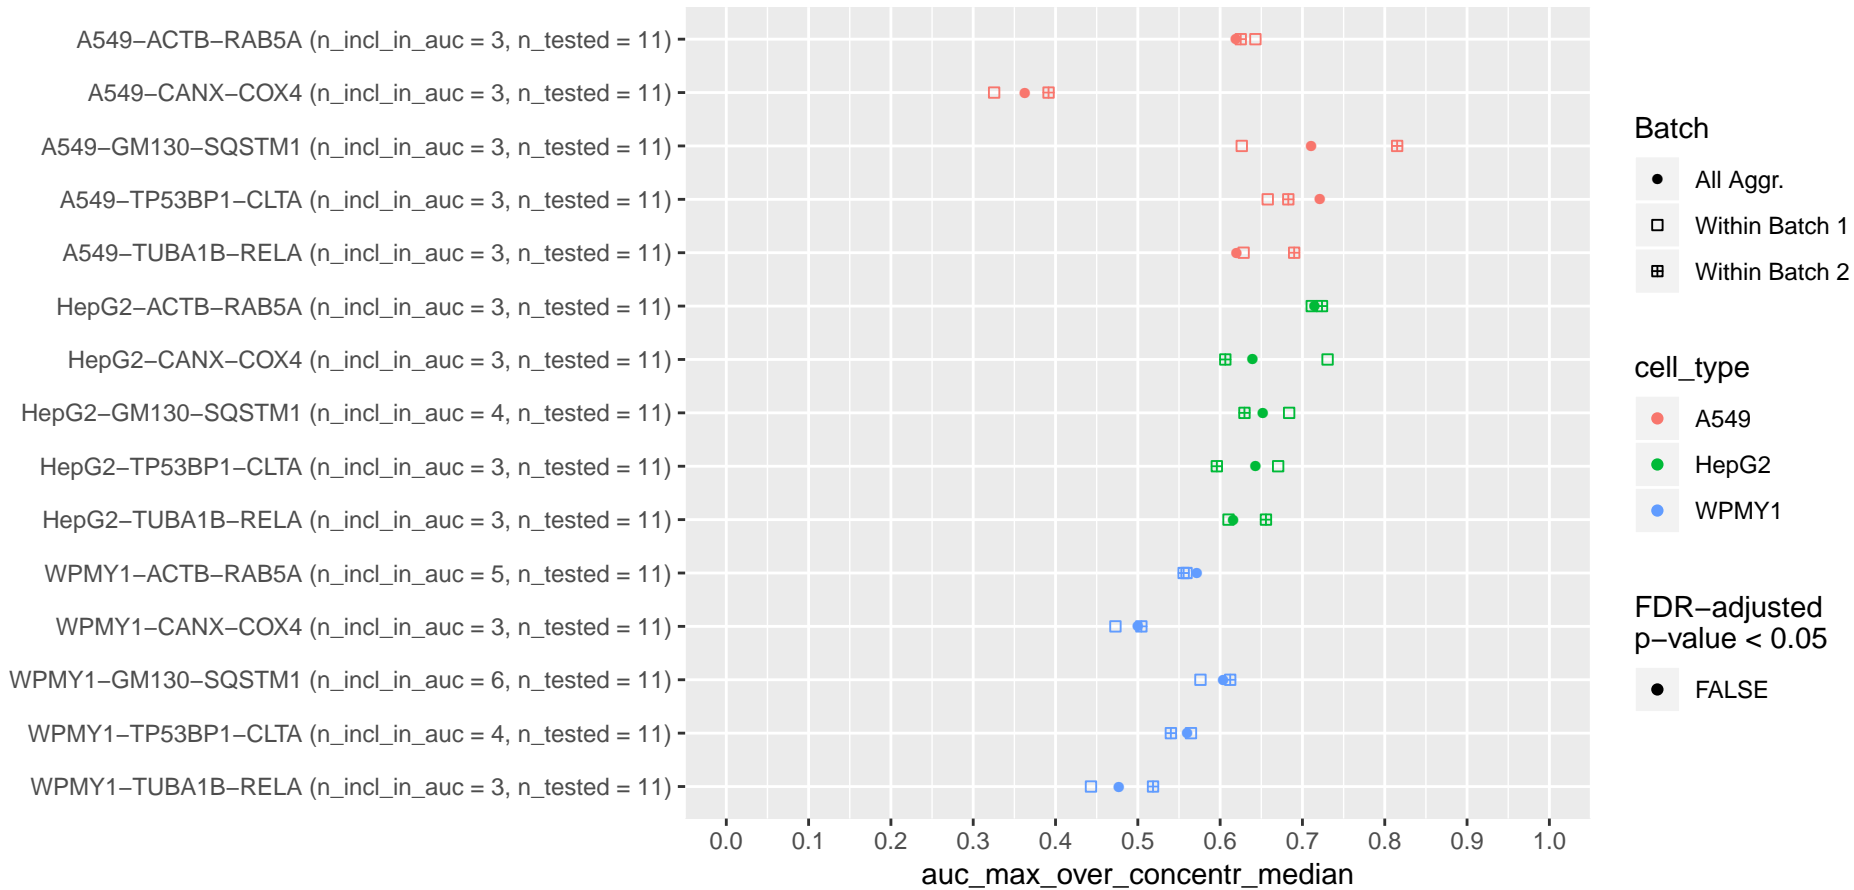

I $\kappa$ B kinase<sup>inhibitor</sup>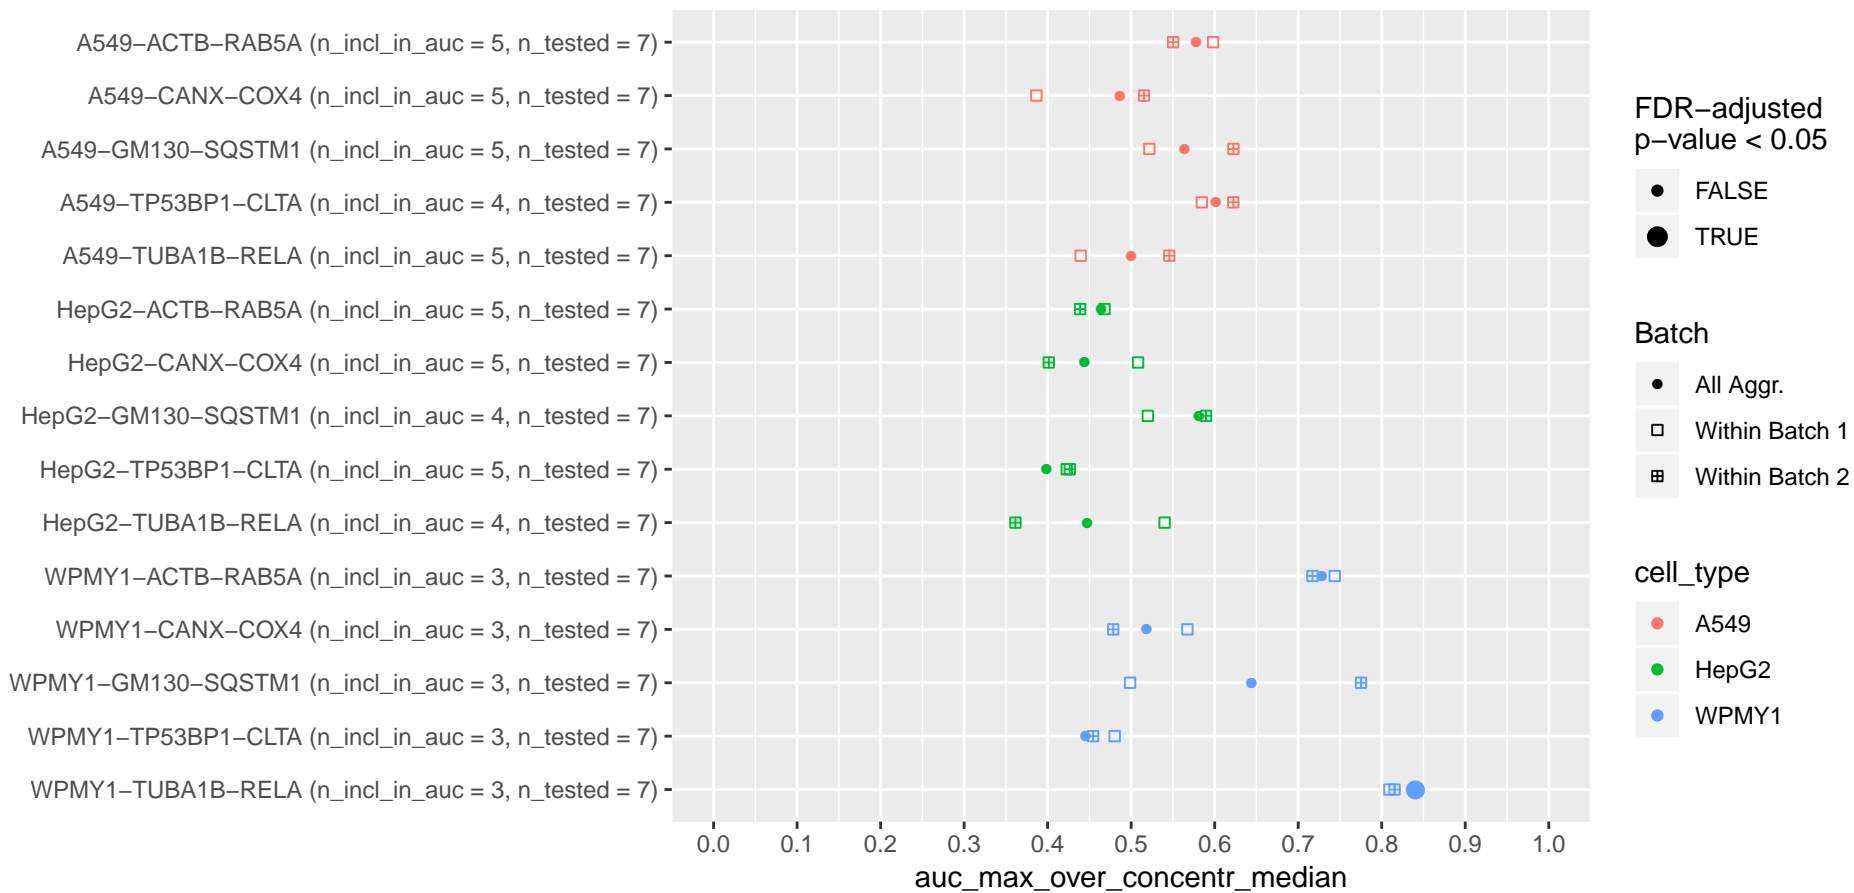

# Insulin receptor family^inhibitor

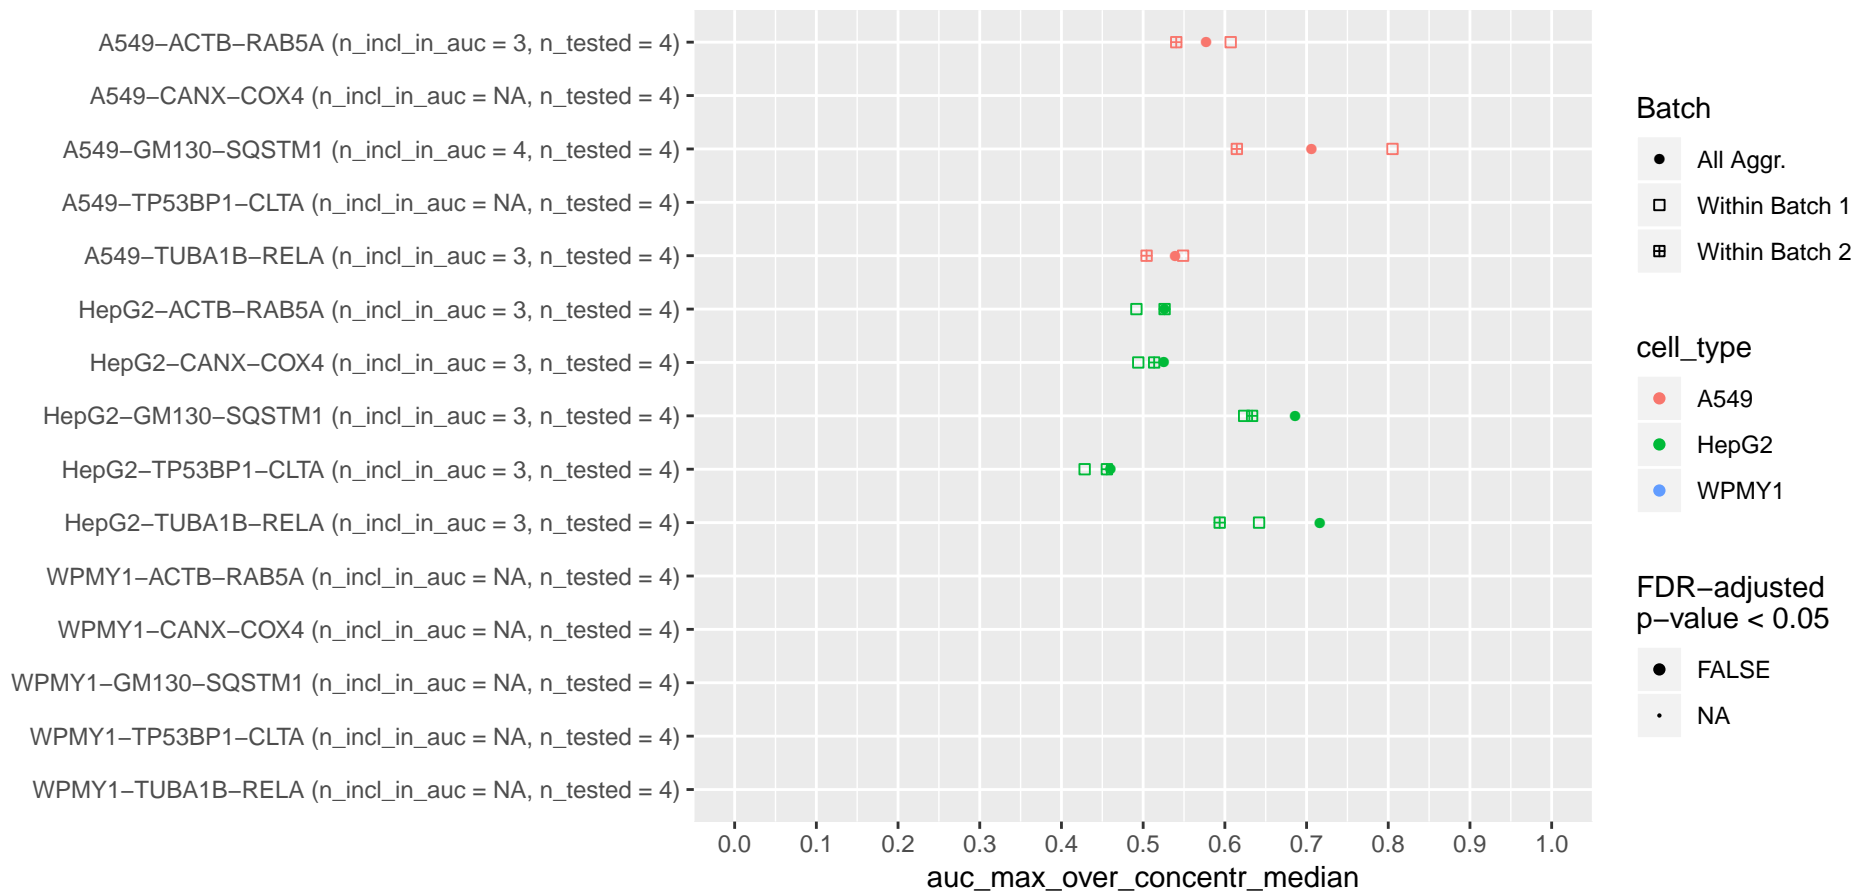

# Janus kinase family<sup>^</sup>inhibitor

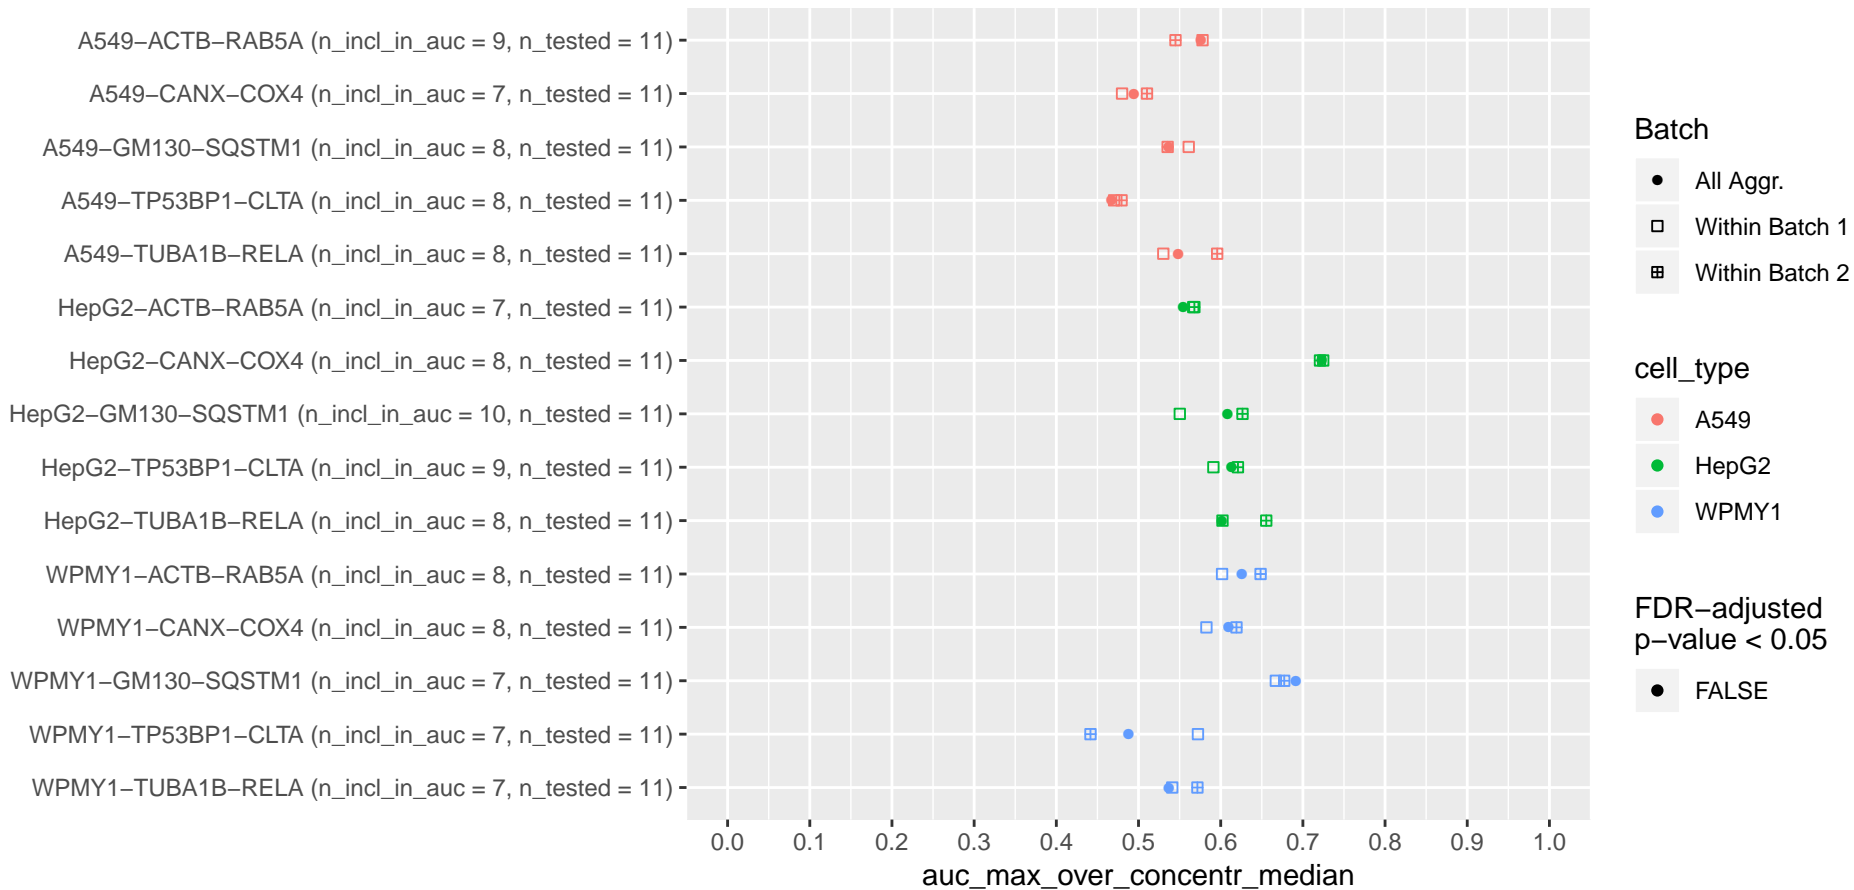

# Kinesin<sup>inhibitor</sup>

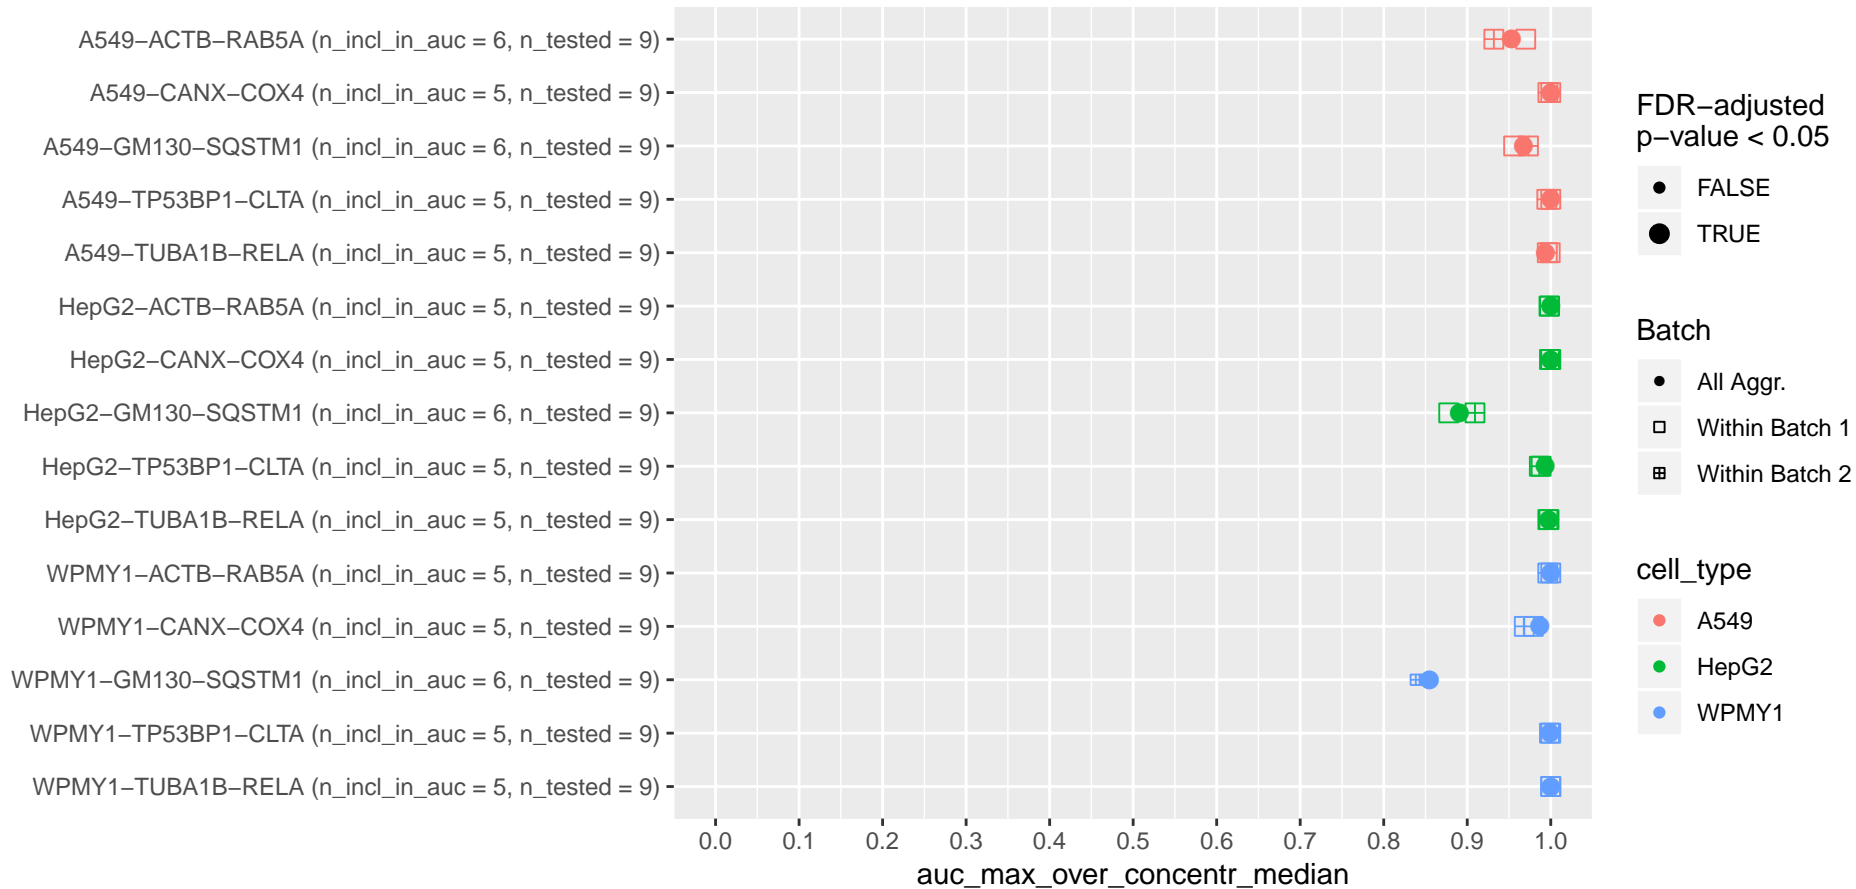

# LRRK2<sup>inhibitor</sup>

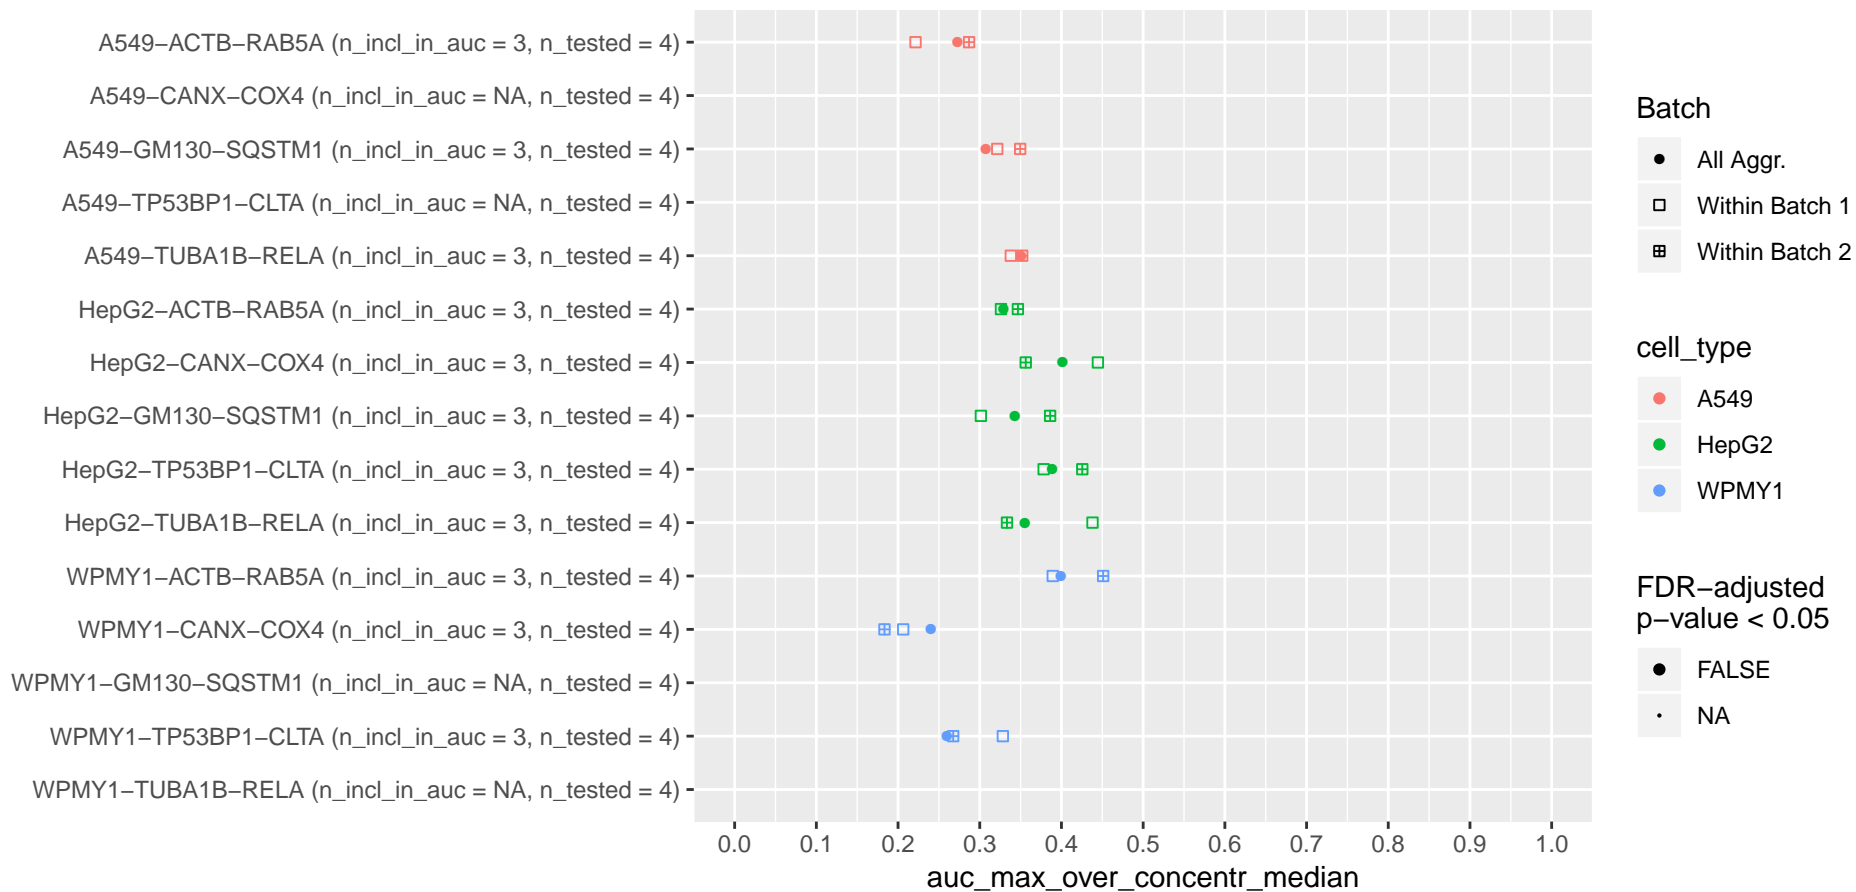



# Lysine methyltransferase<sup>inhibitor</sup>

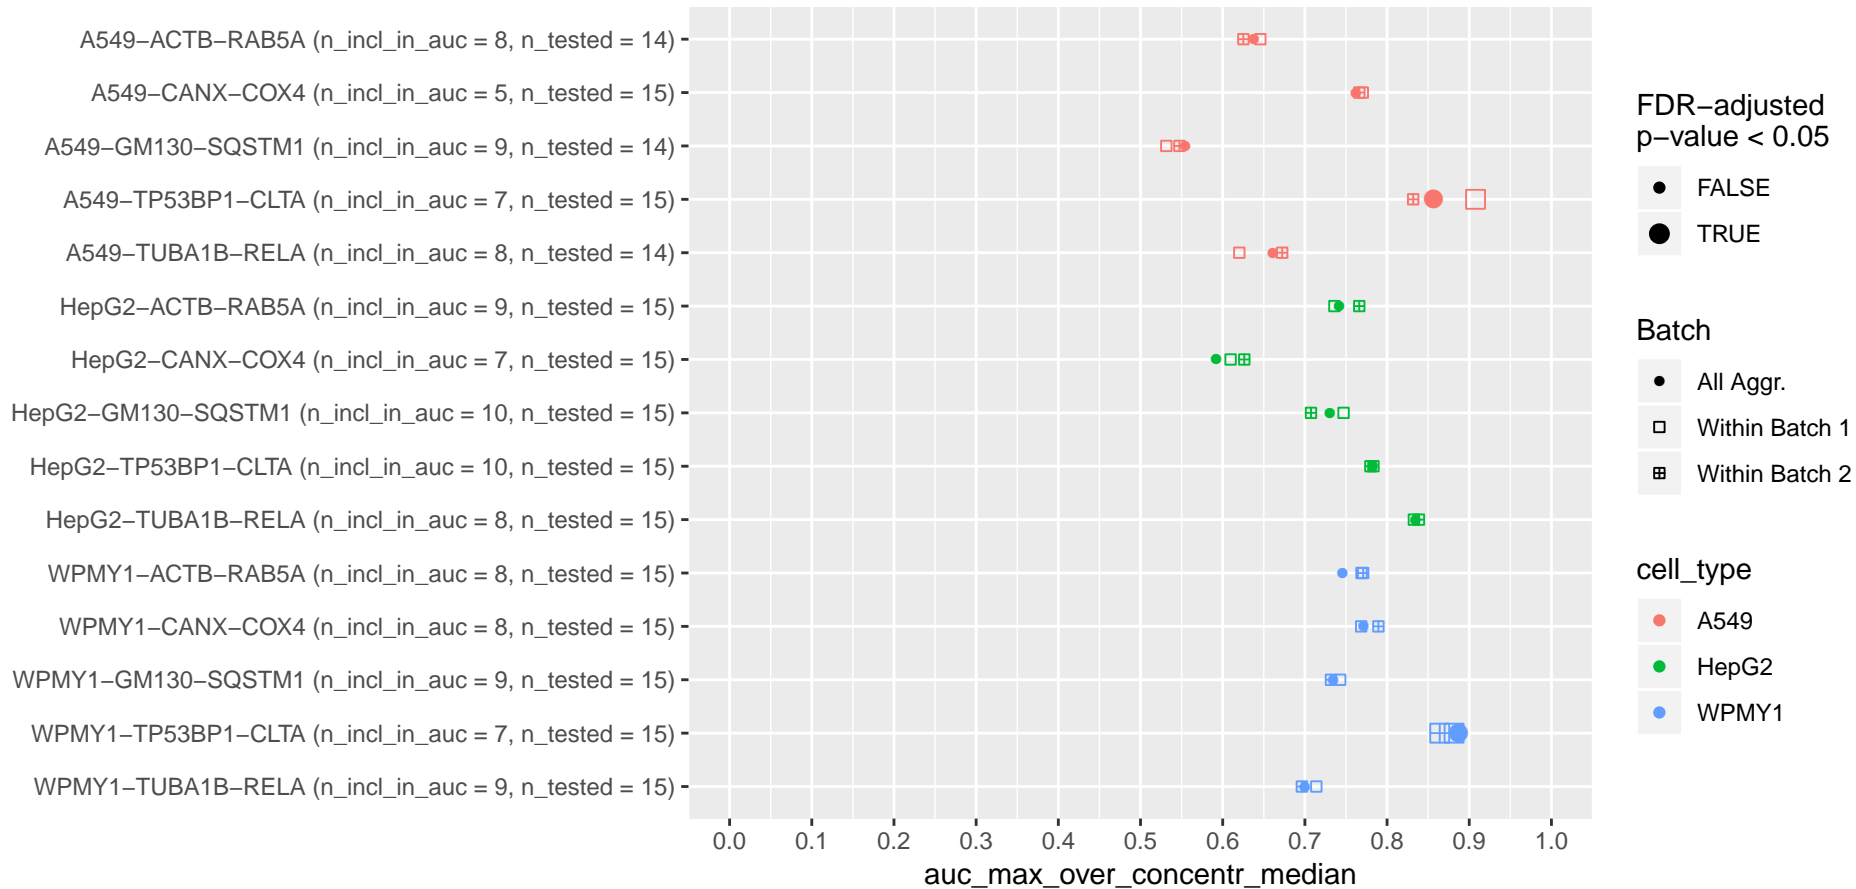

# MEK<sup>inhibitor</sup>

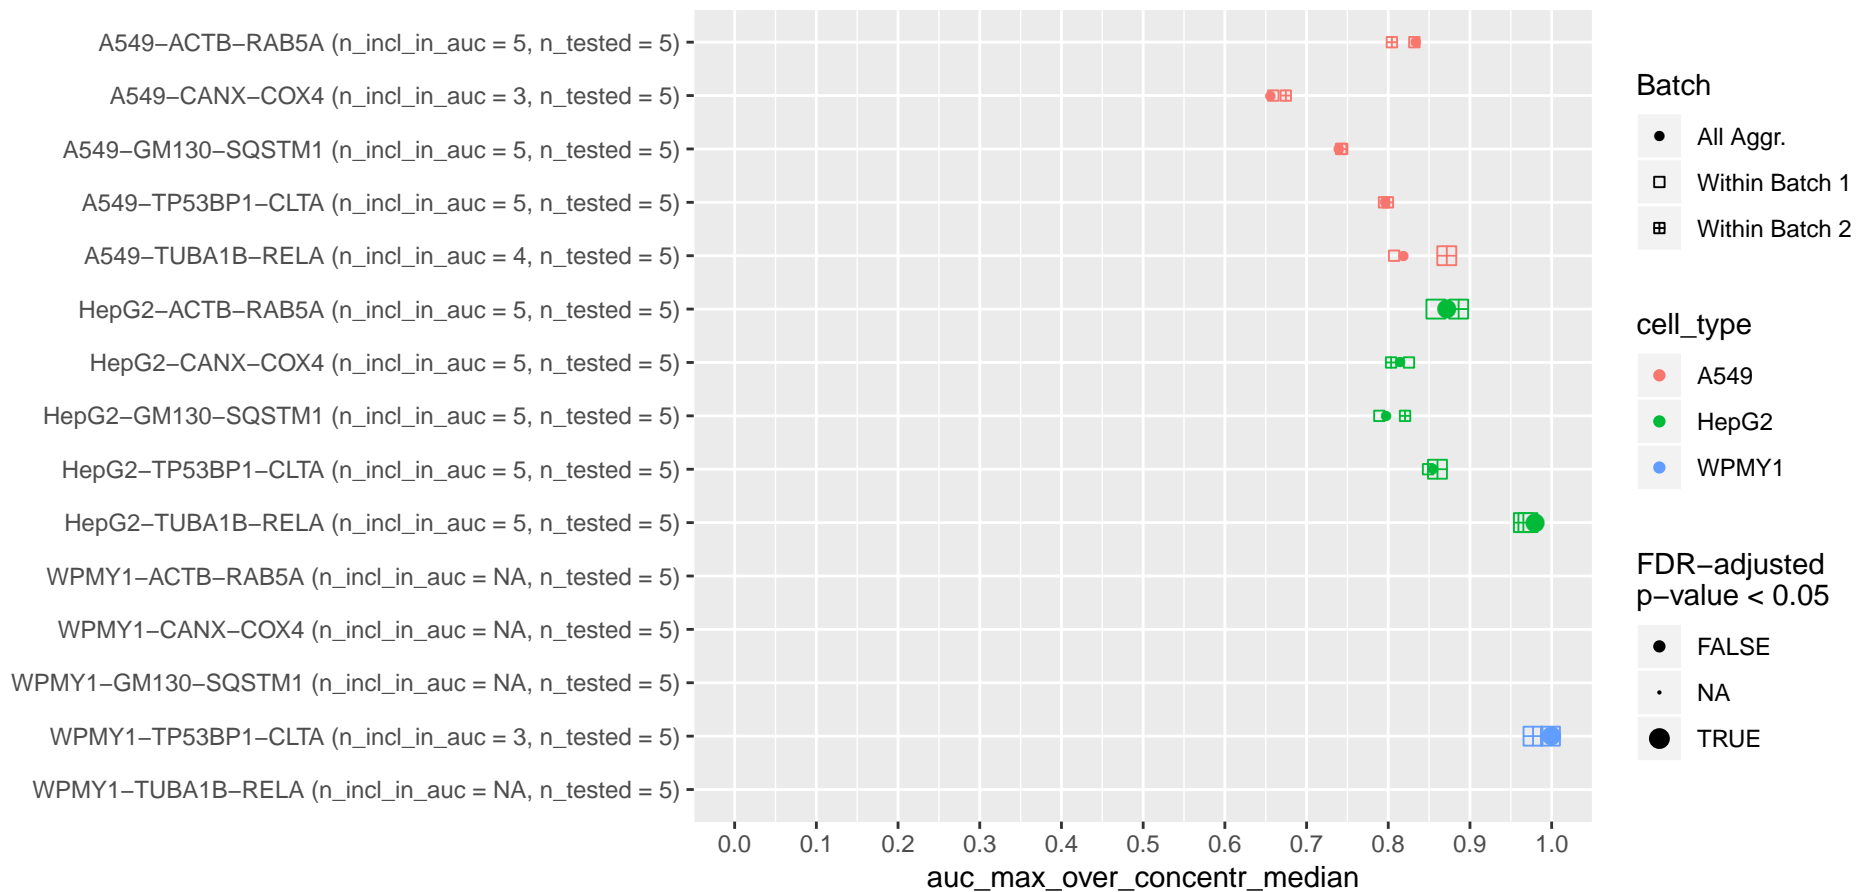

# Microtubule<sup>^</sup>inhibitor

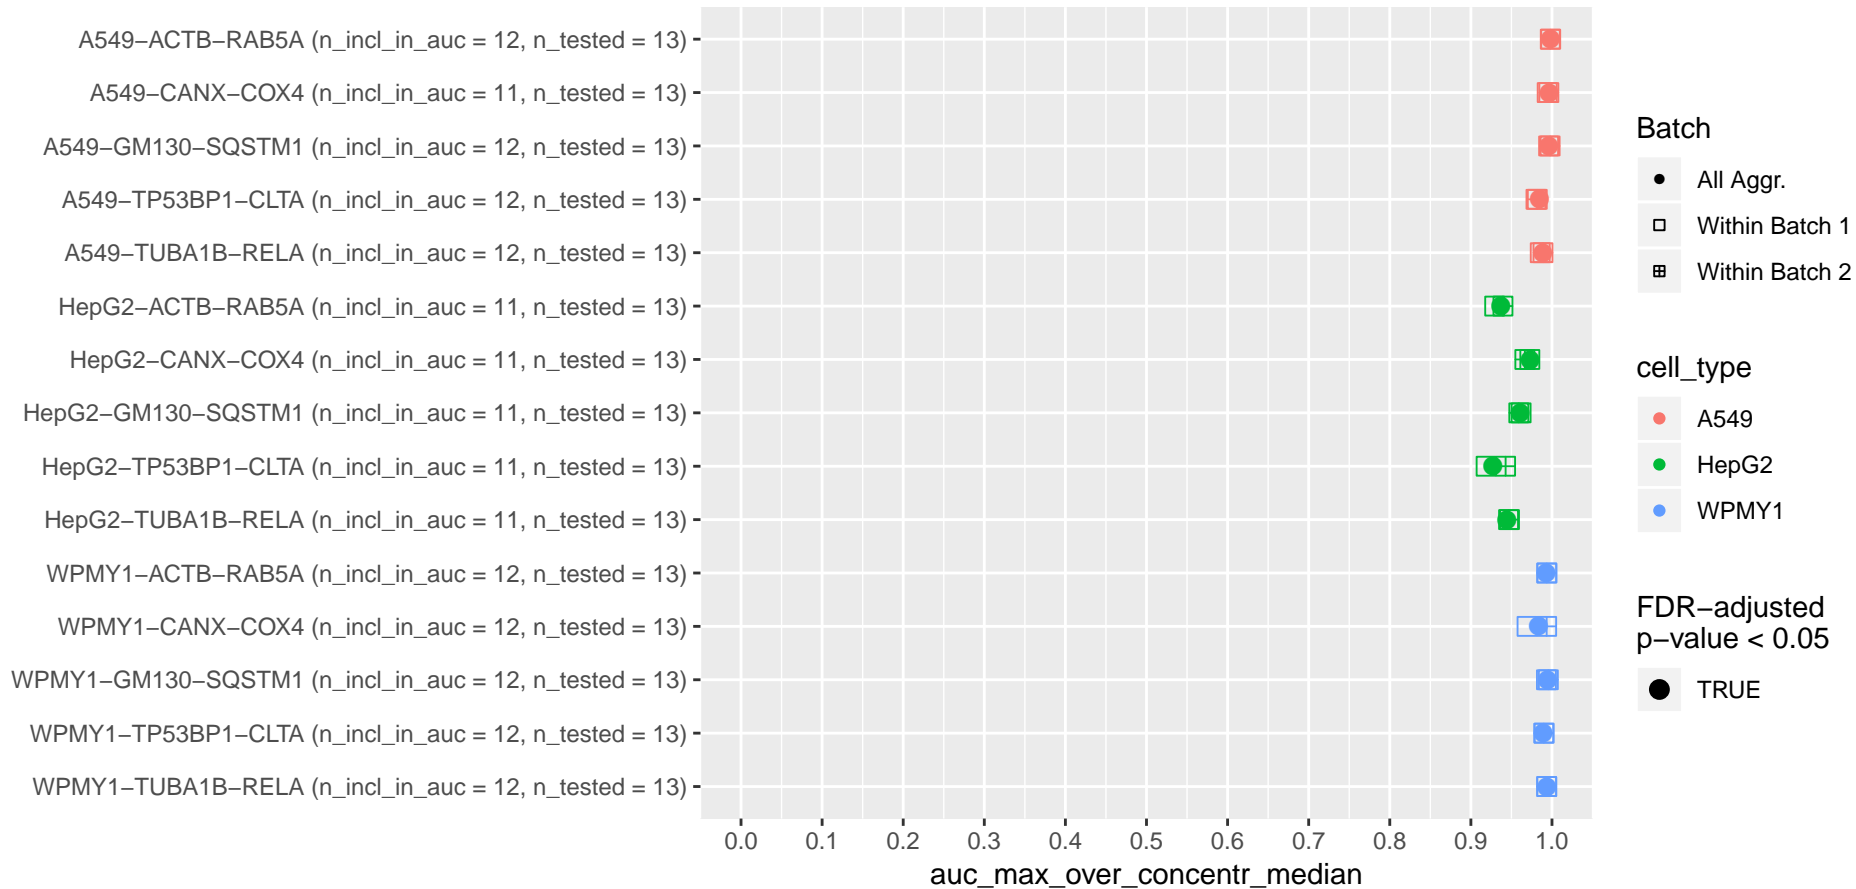

# Microtubule^stabilizer

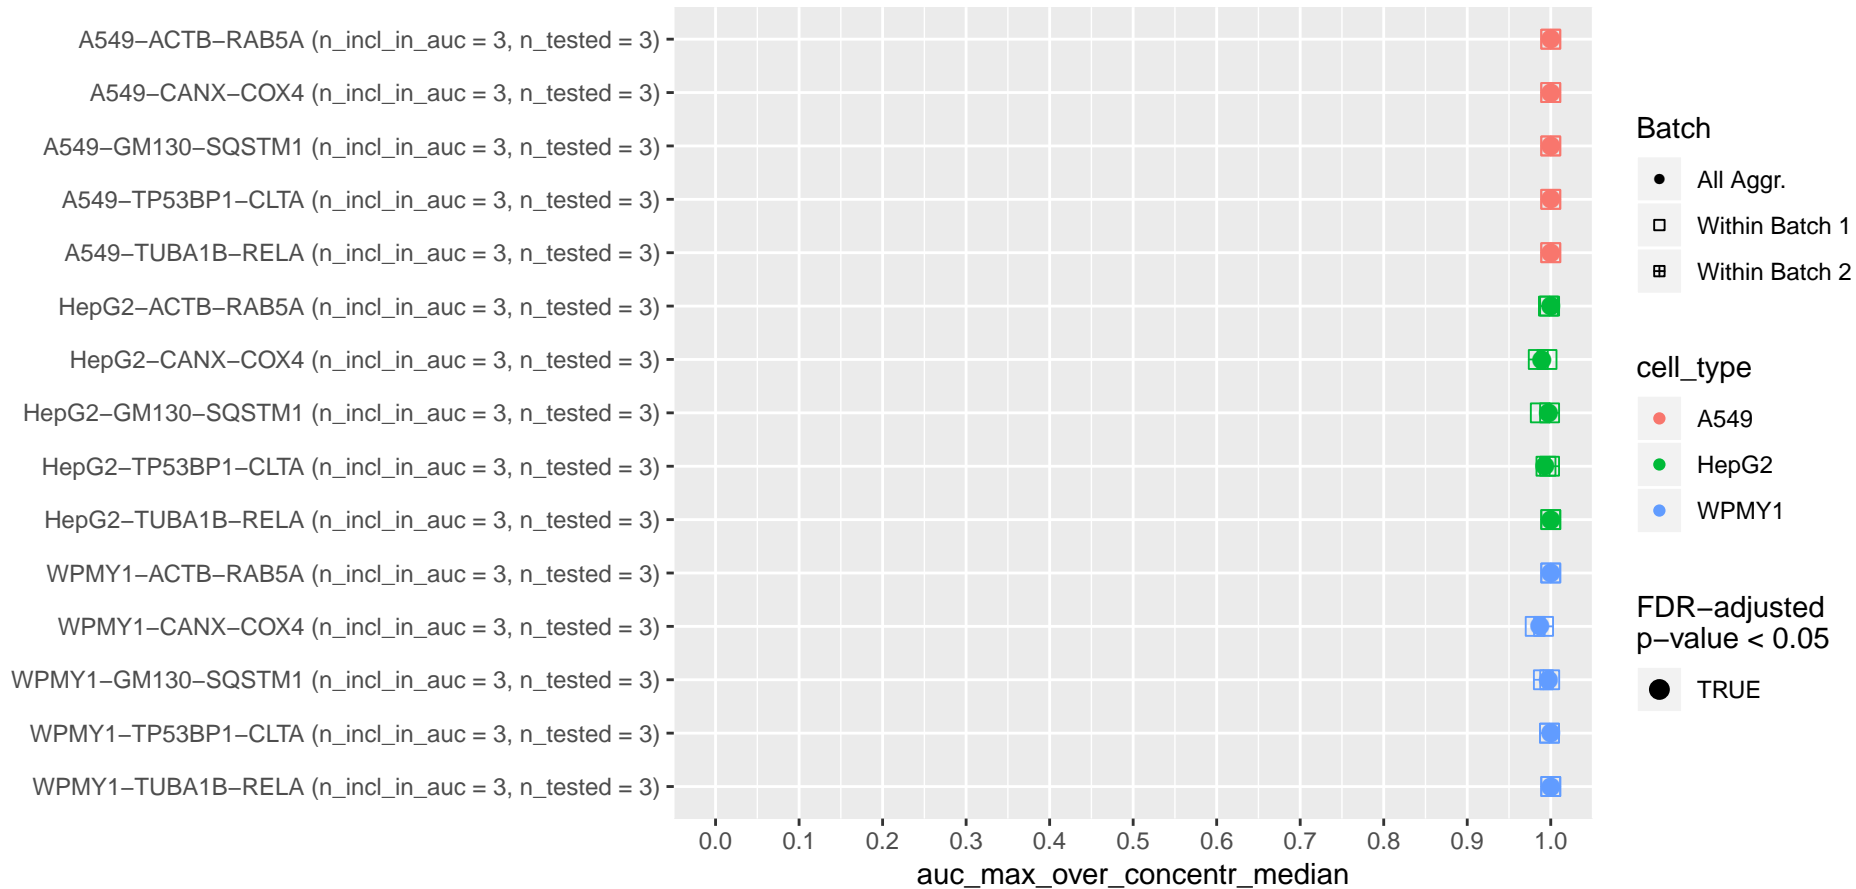

# Monoamine transporter (SLC6A2-4)<sup>hi</sup>inhibitor

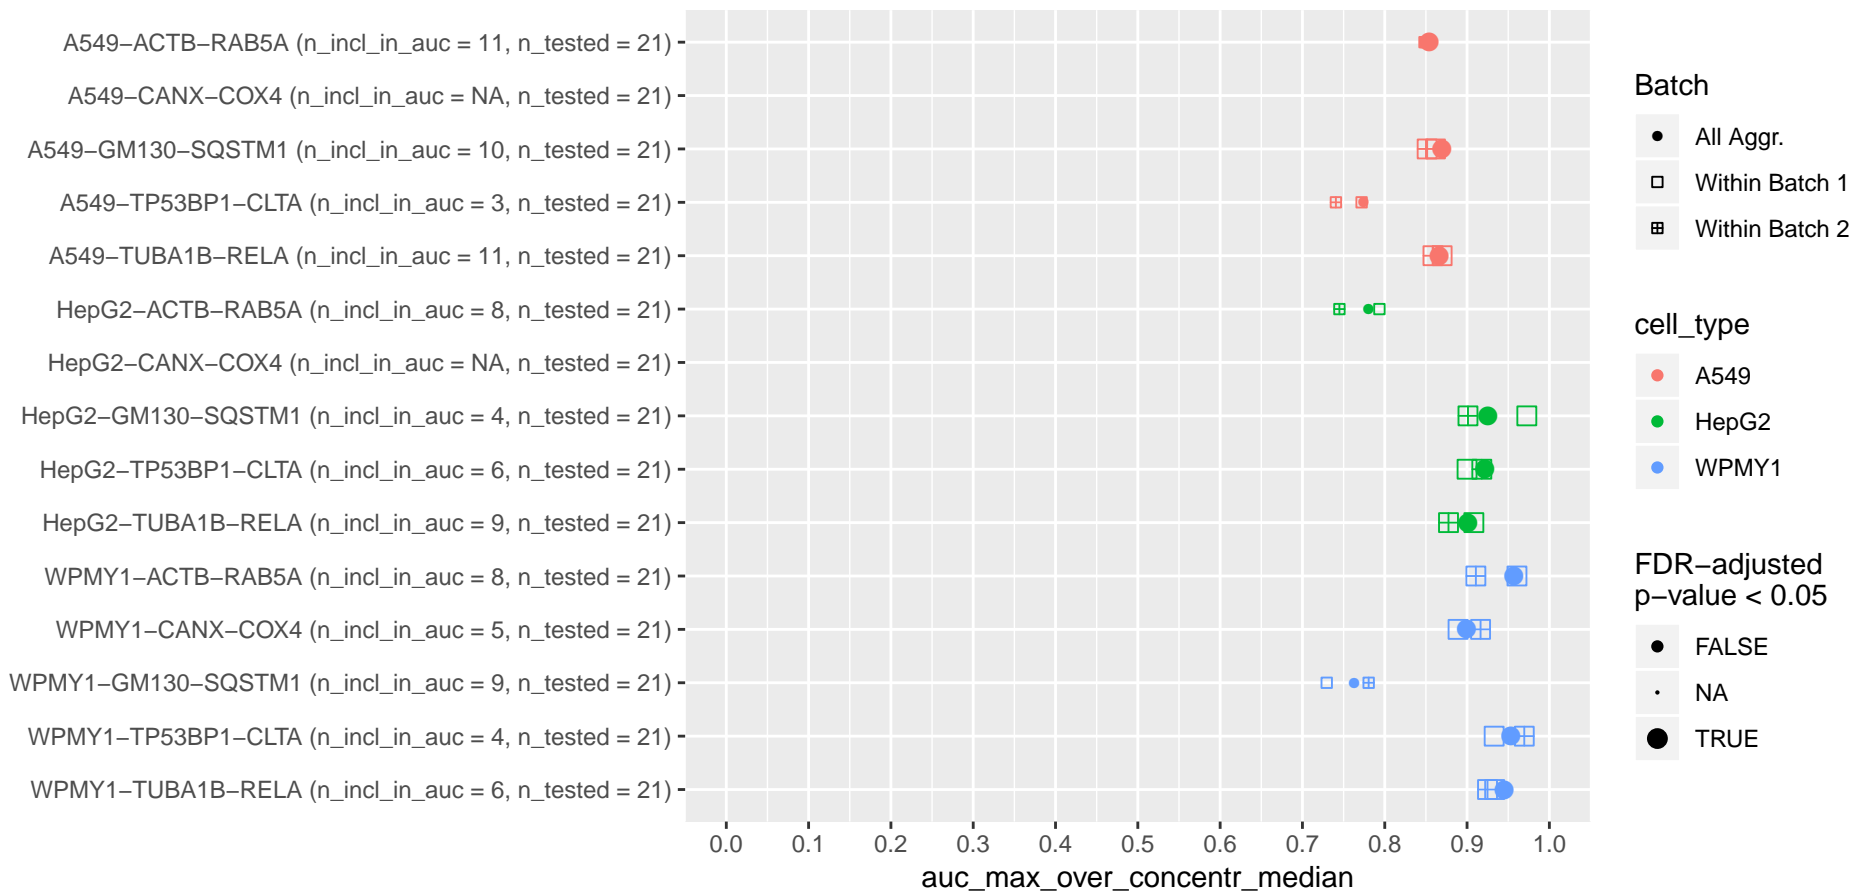

# Monopolar spindle 1 kinase<sup>inhibitor</sup>

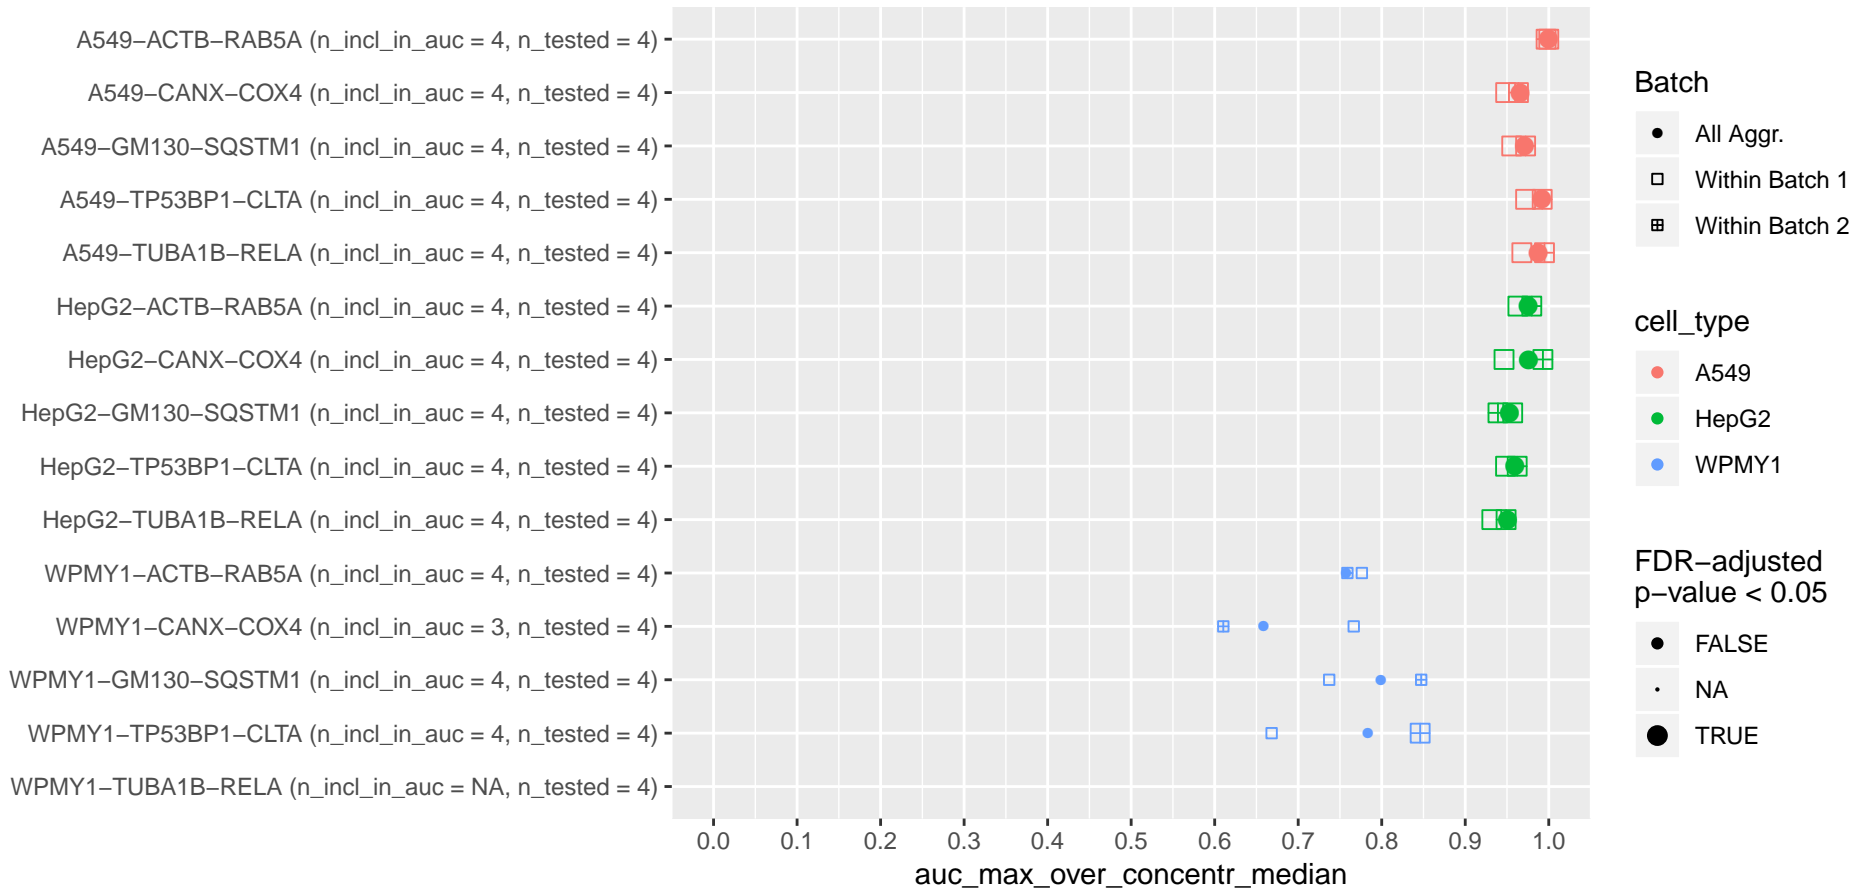

# NFkB pathway^inhibitor

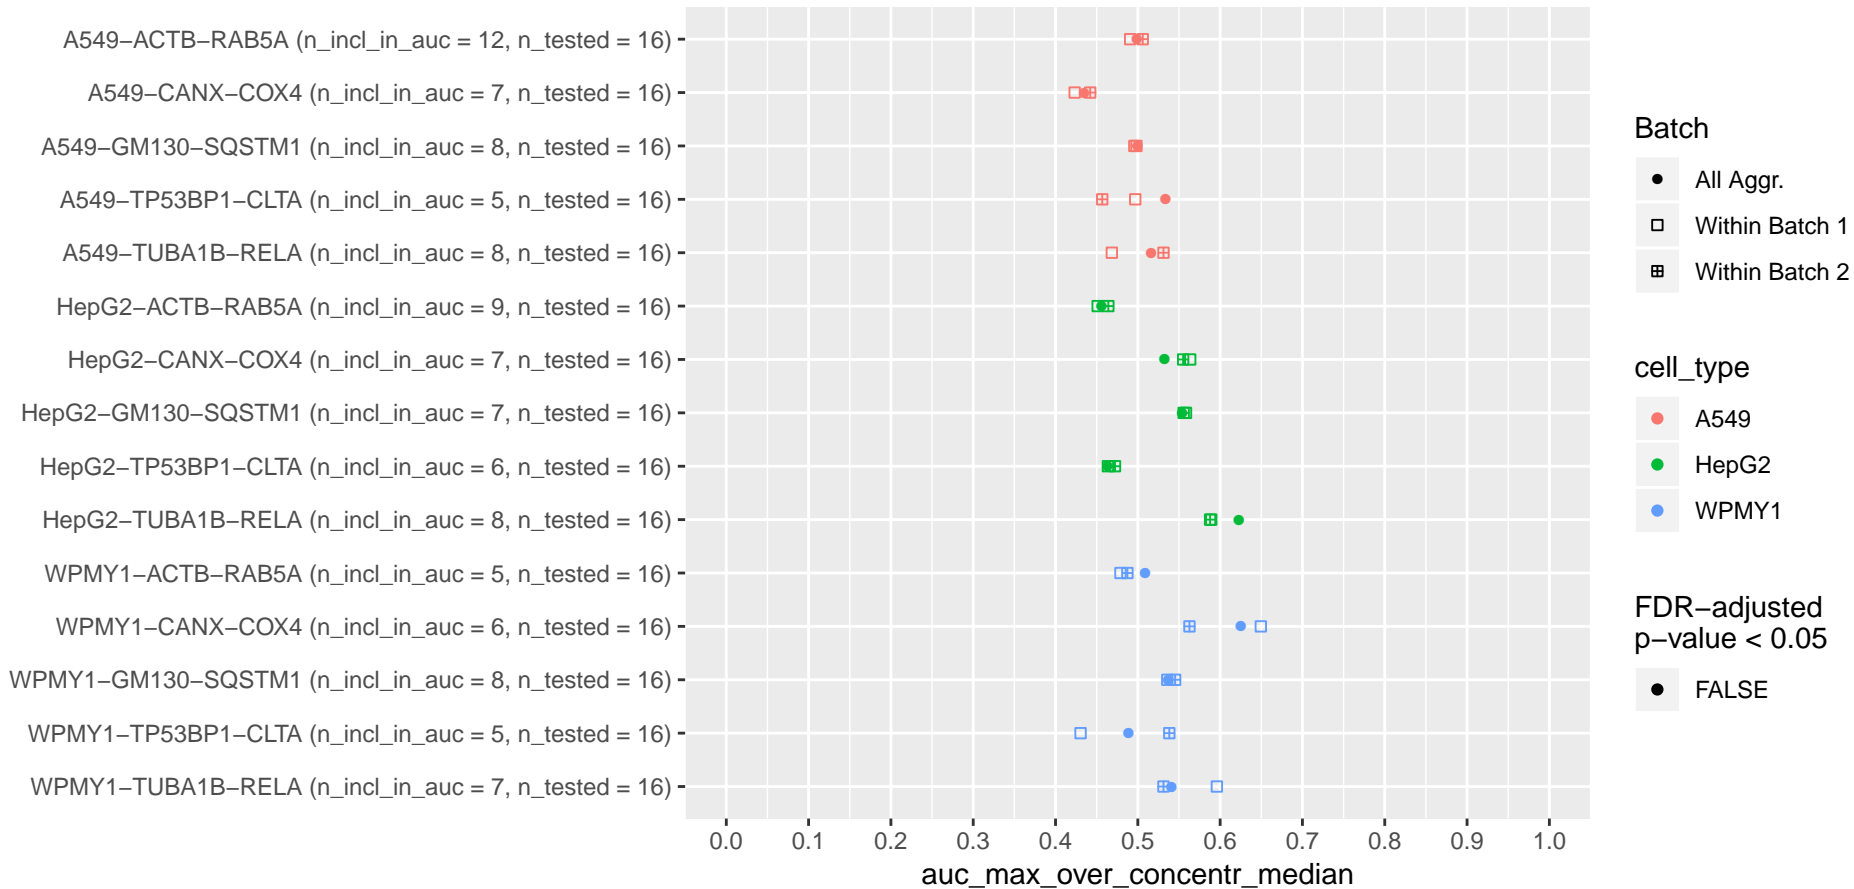

# Non-selective Tyrosine kinase<sup>in</sup>hibitor

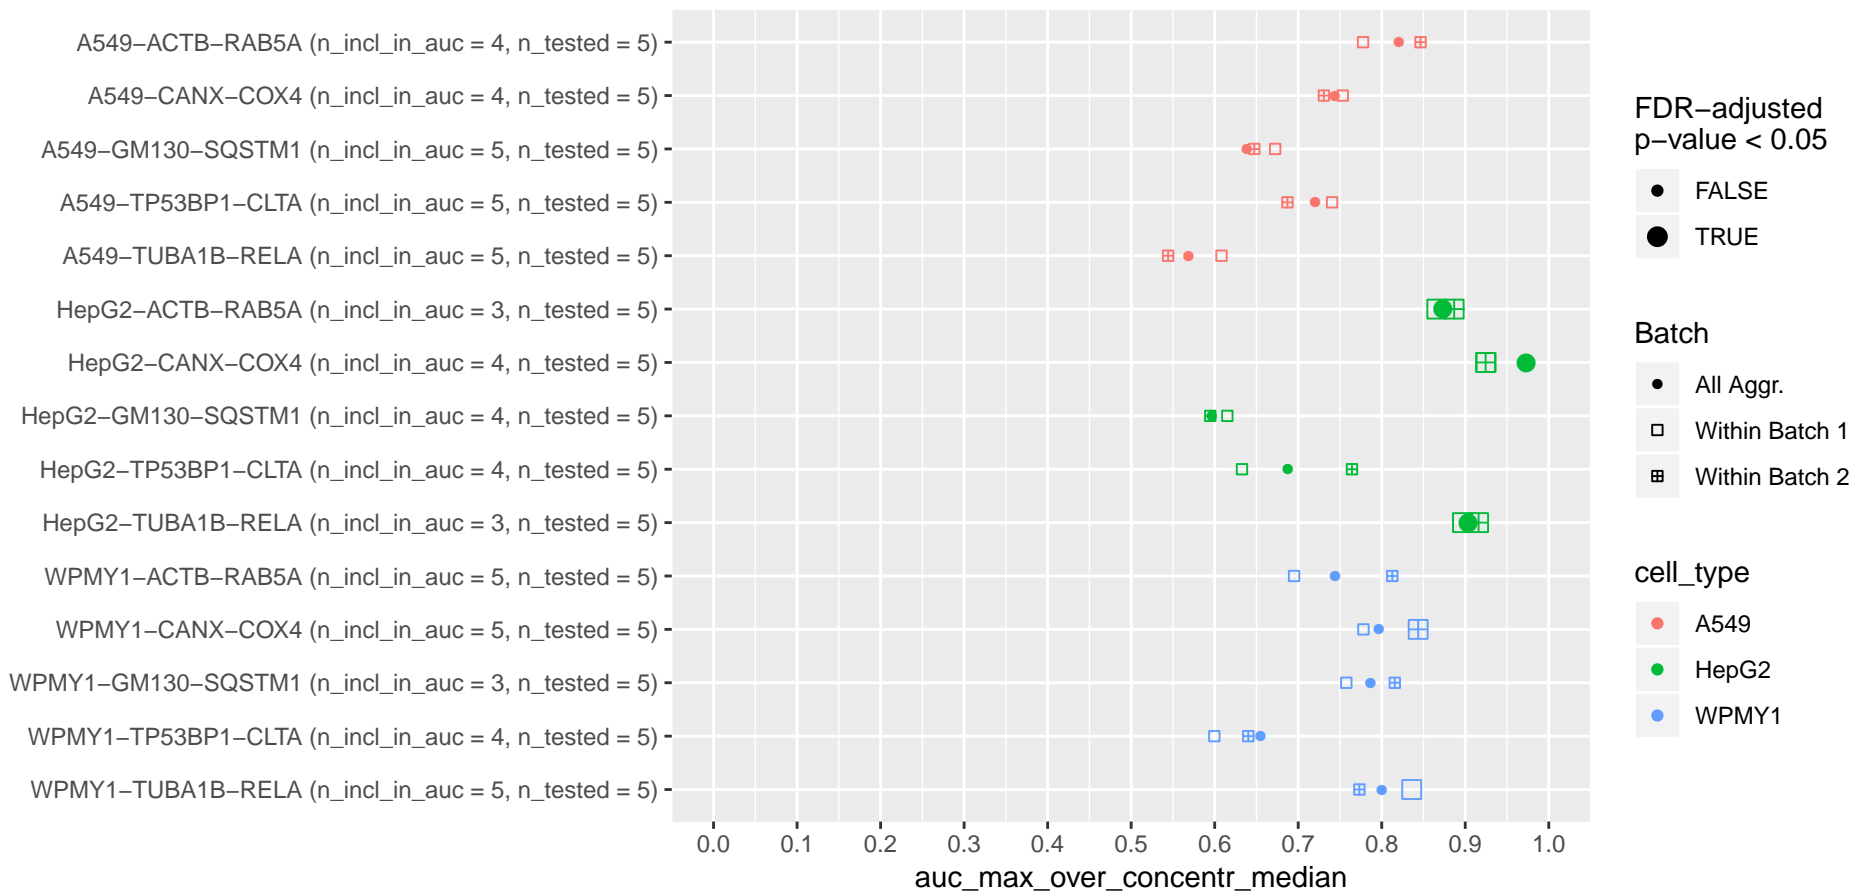



# Non-selective kinase<sup>^</sup>inhibitor

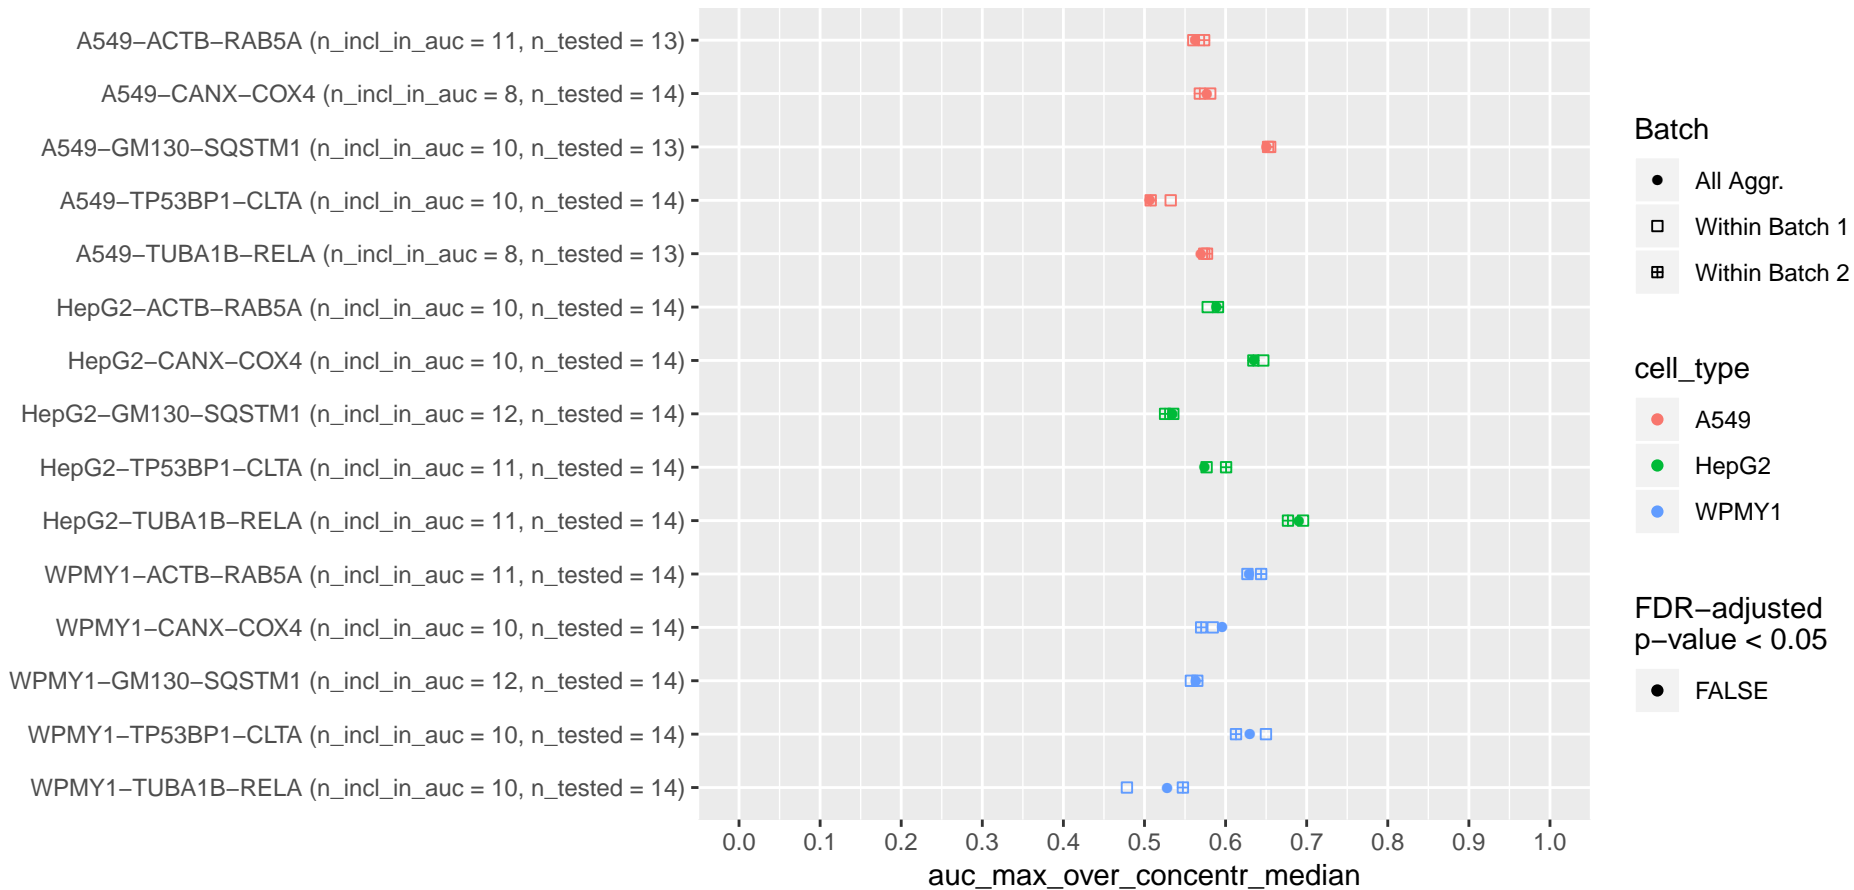

# Nrf2^activator

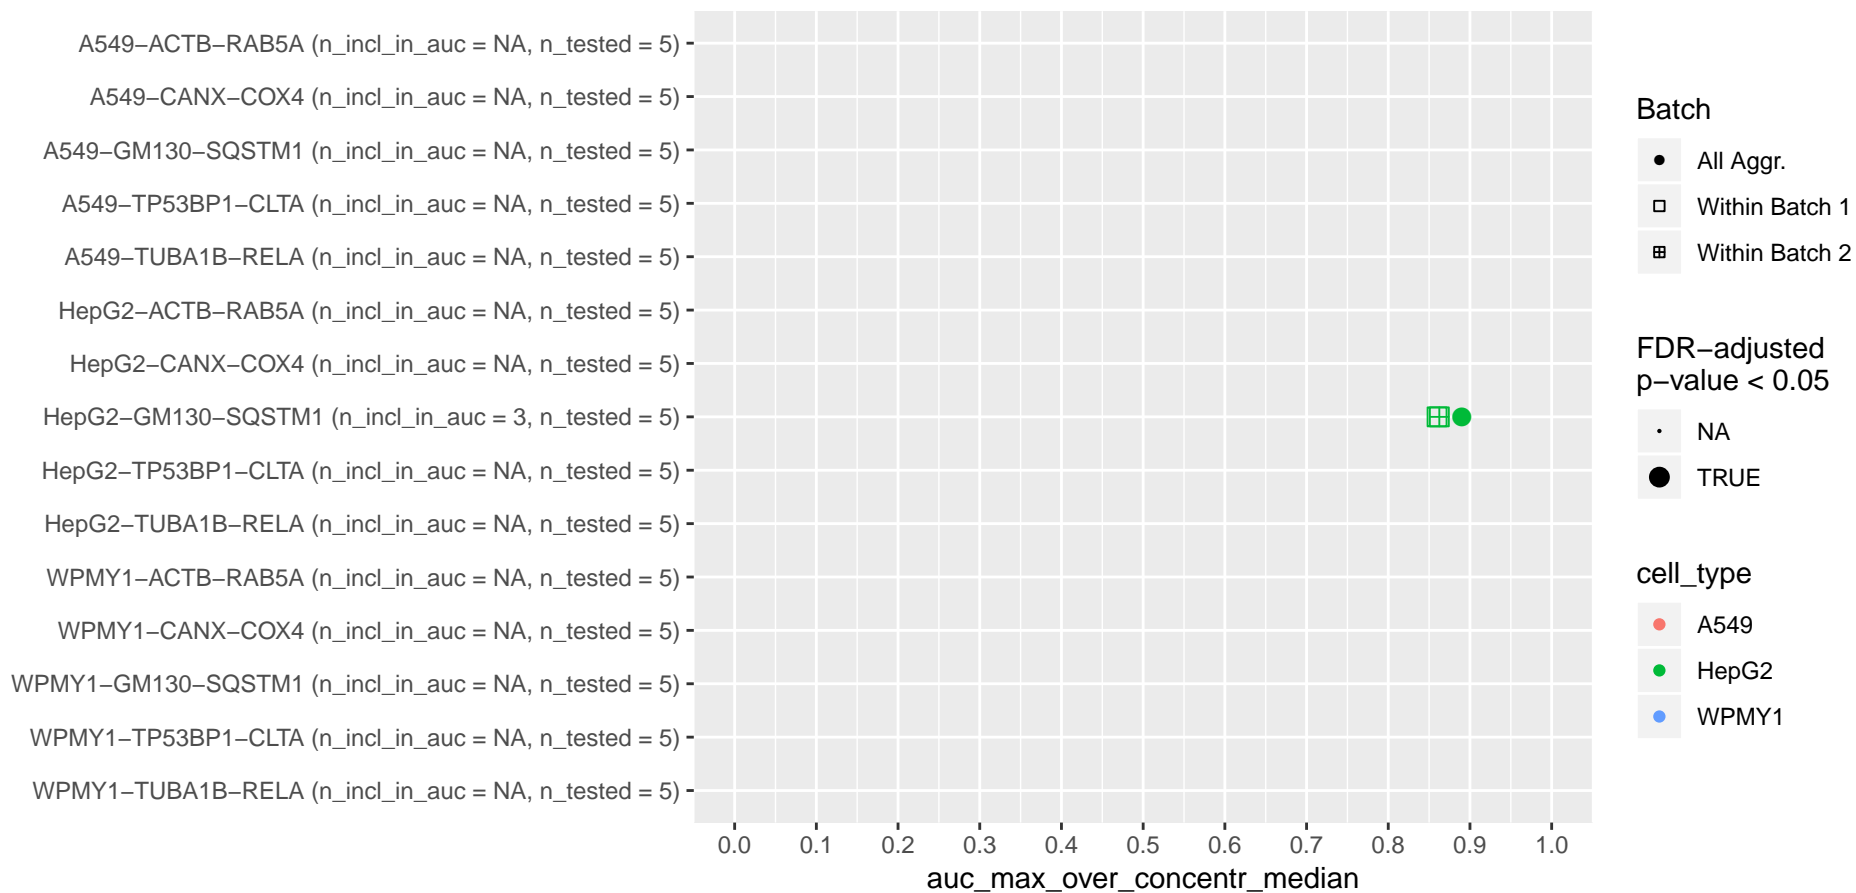

# Nucleoside analog

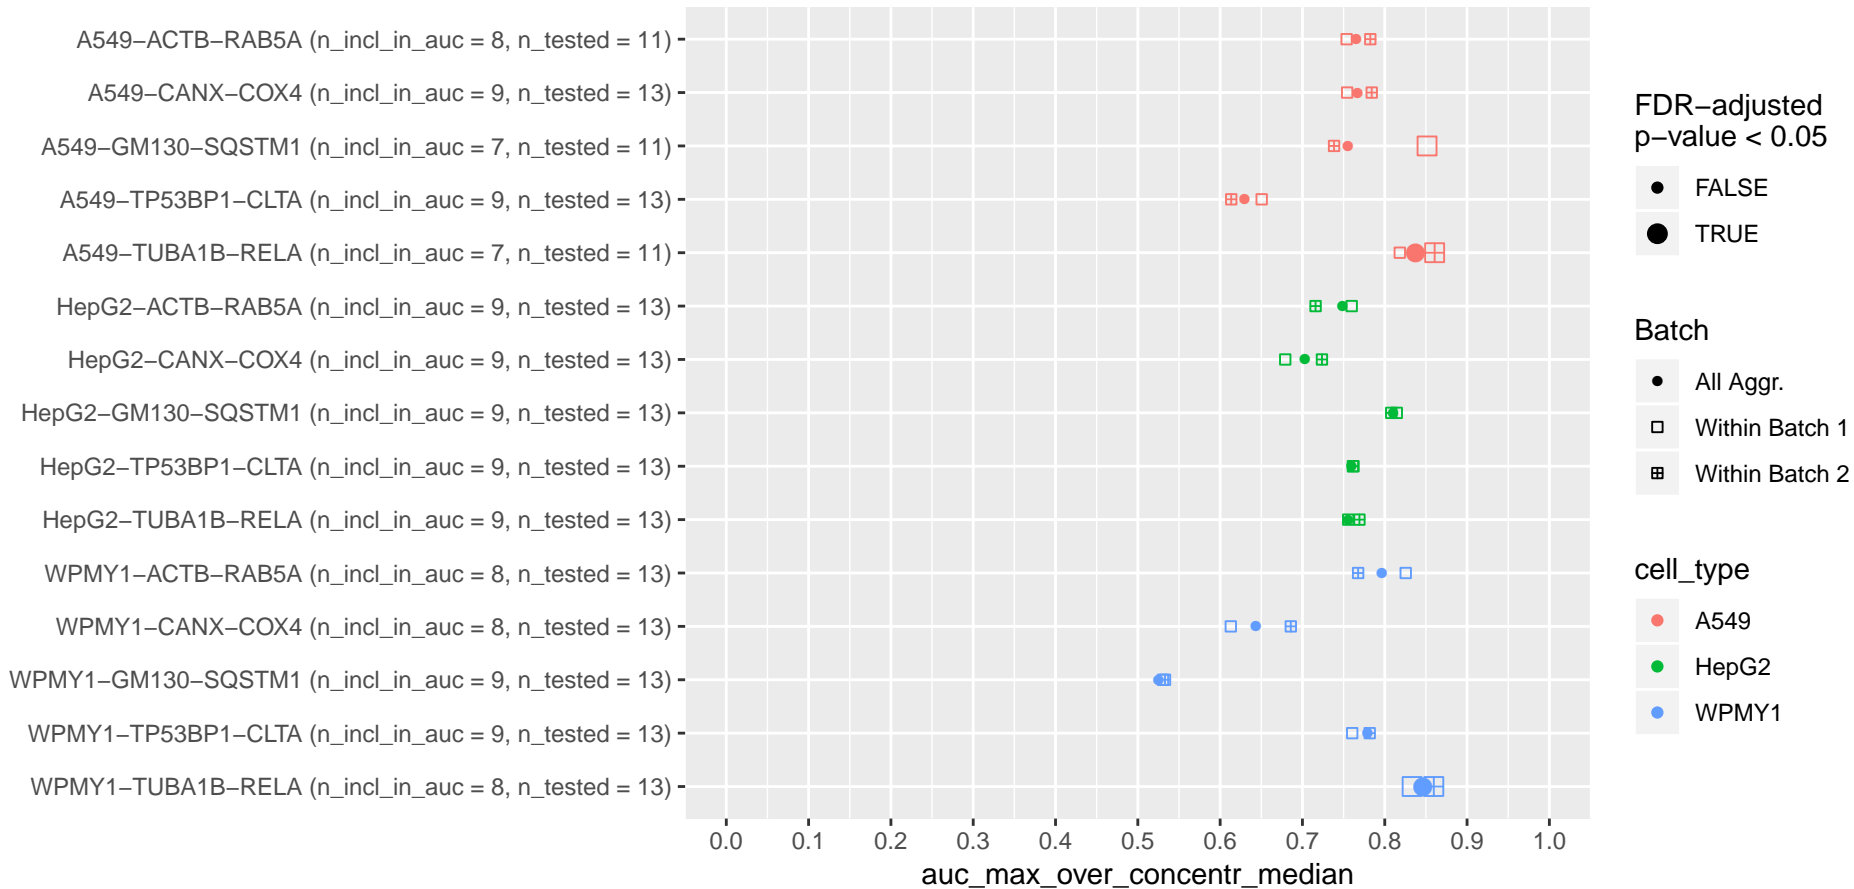

# Oxidative phosphorylation^uncoupler

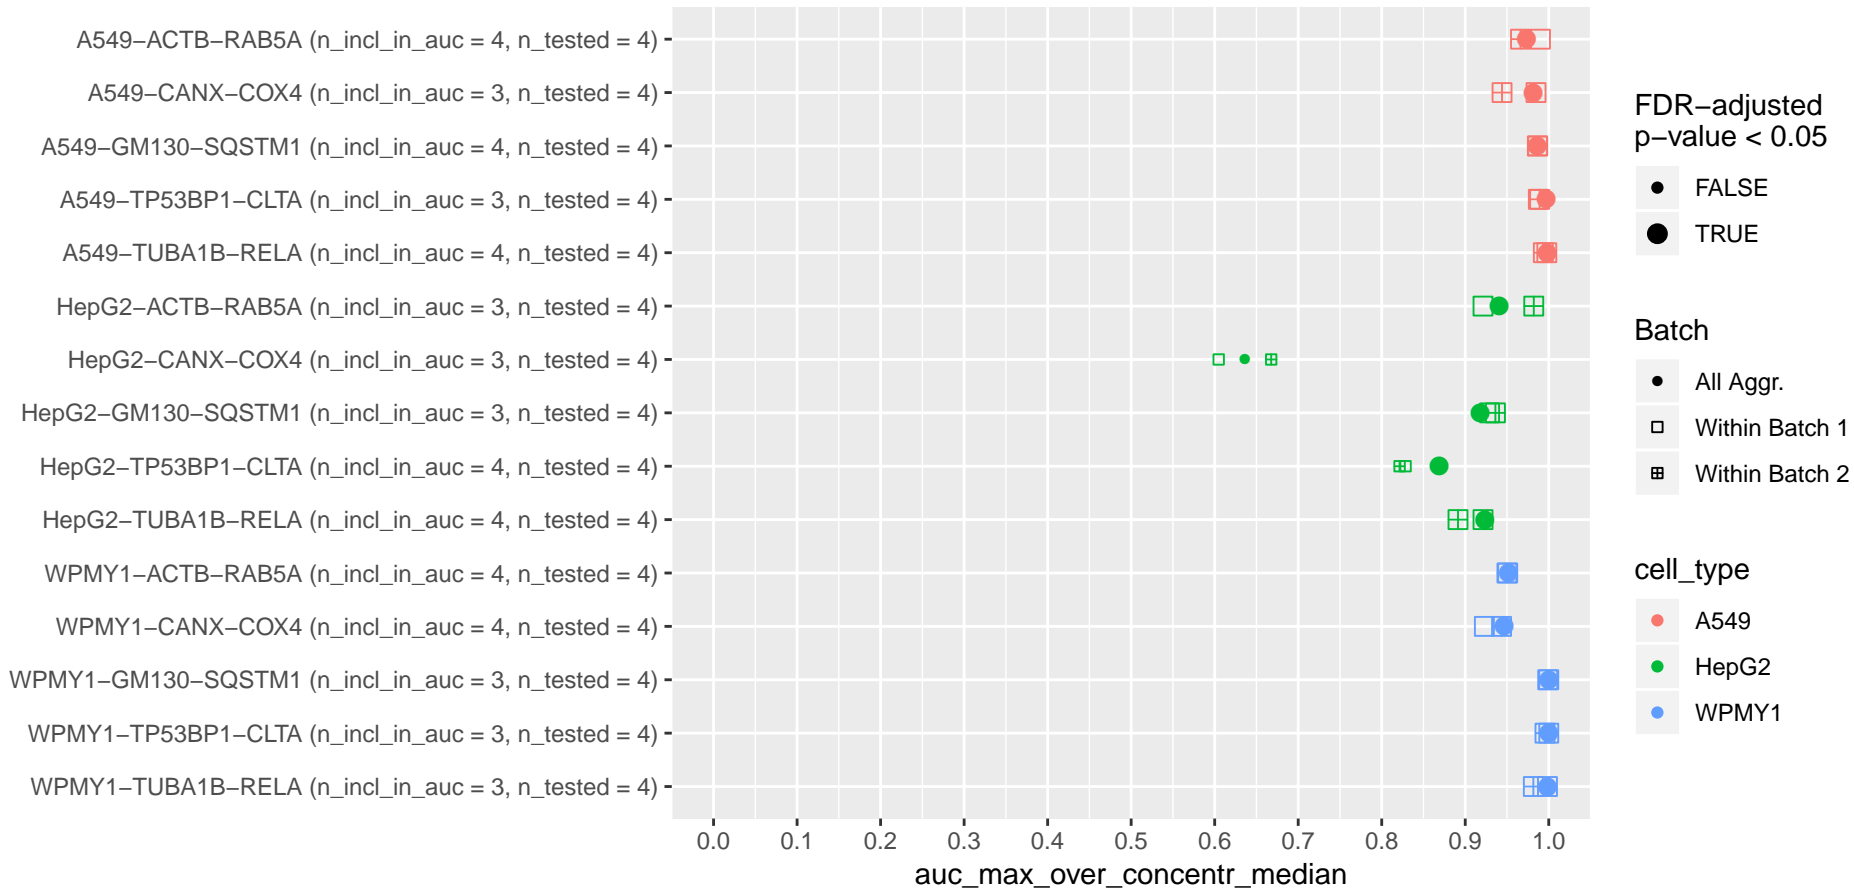

# PDGFR family^inhibitor

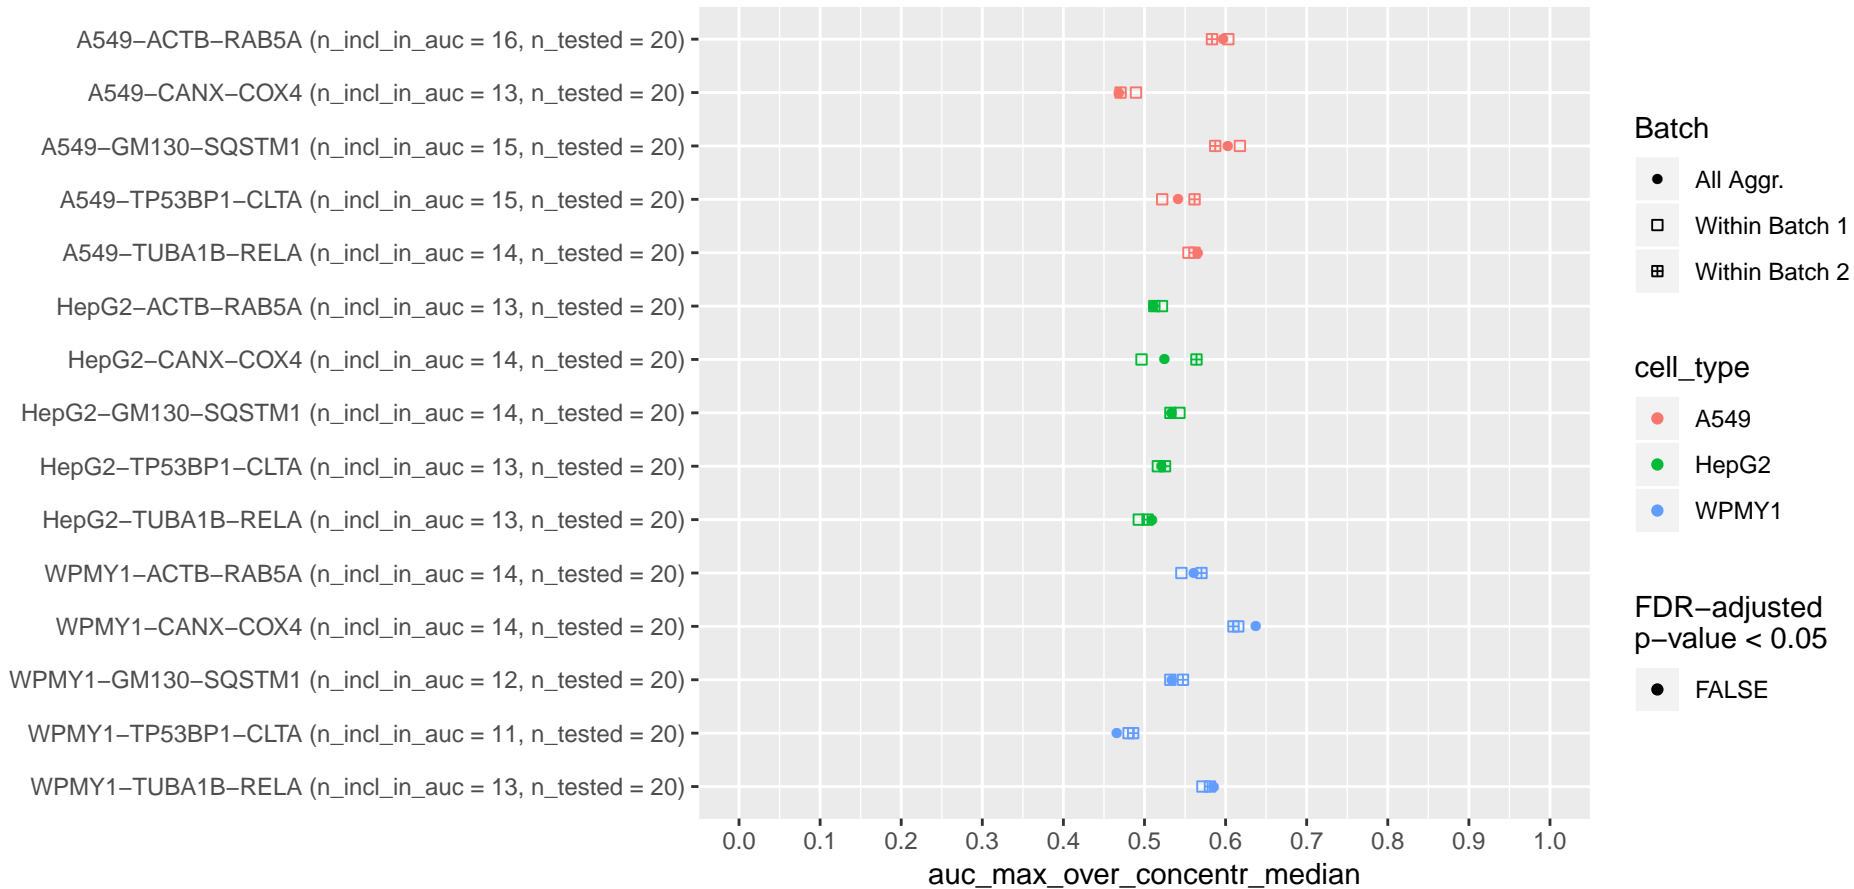

# PDK1<sup>inhibitor</sup>

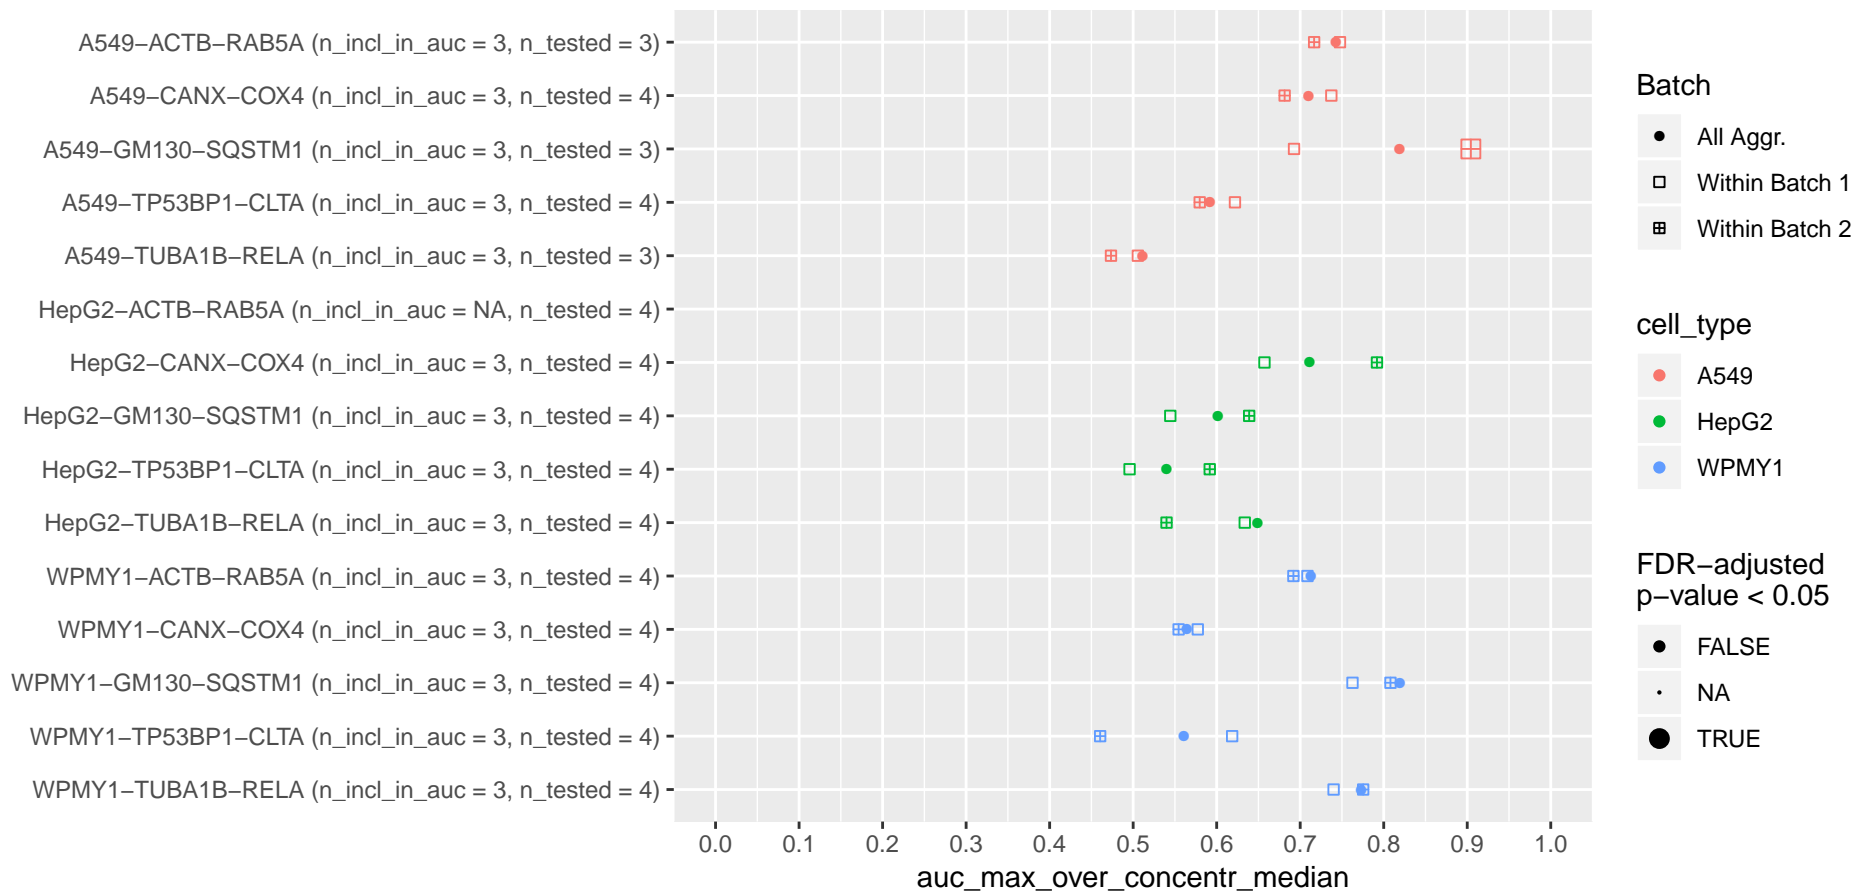

# PI3K<sup>in</sup>hibitor

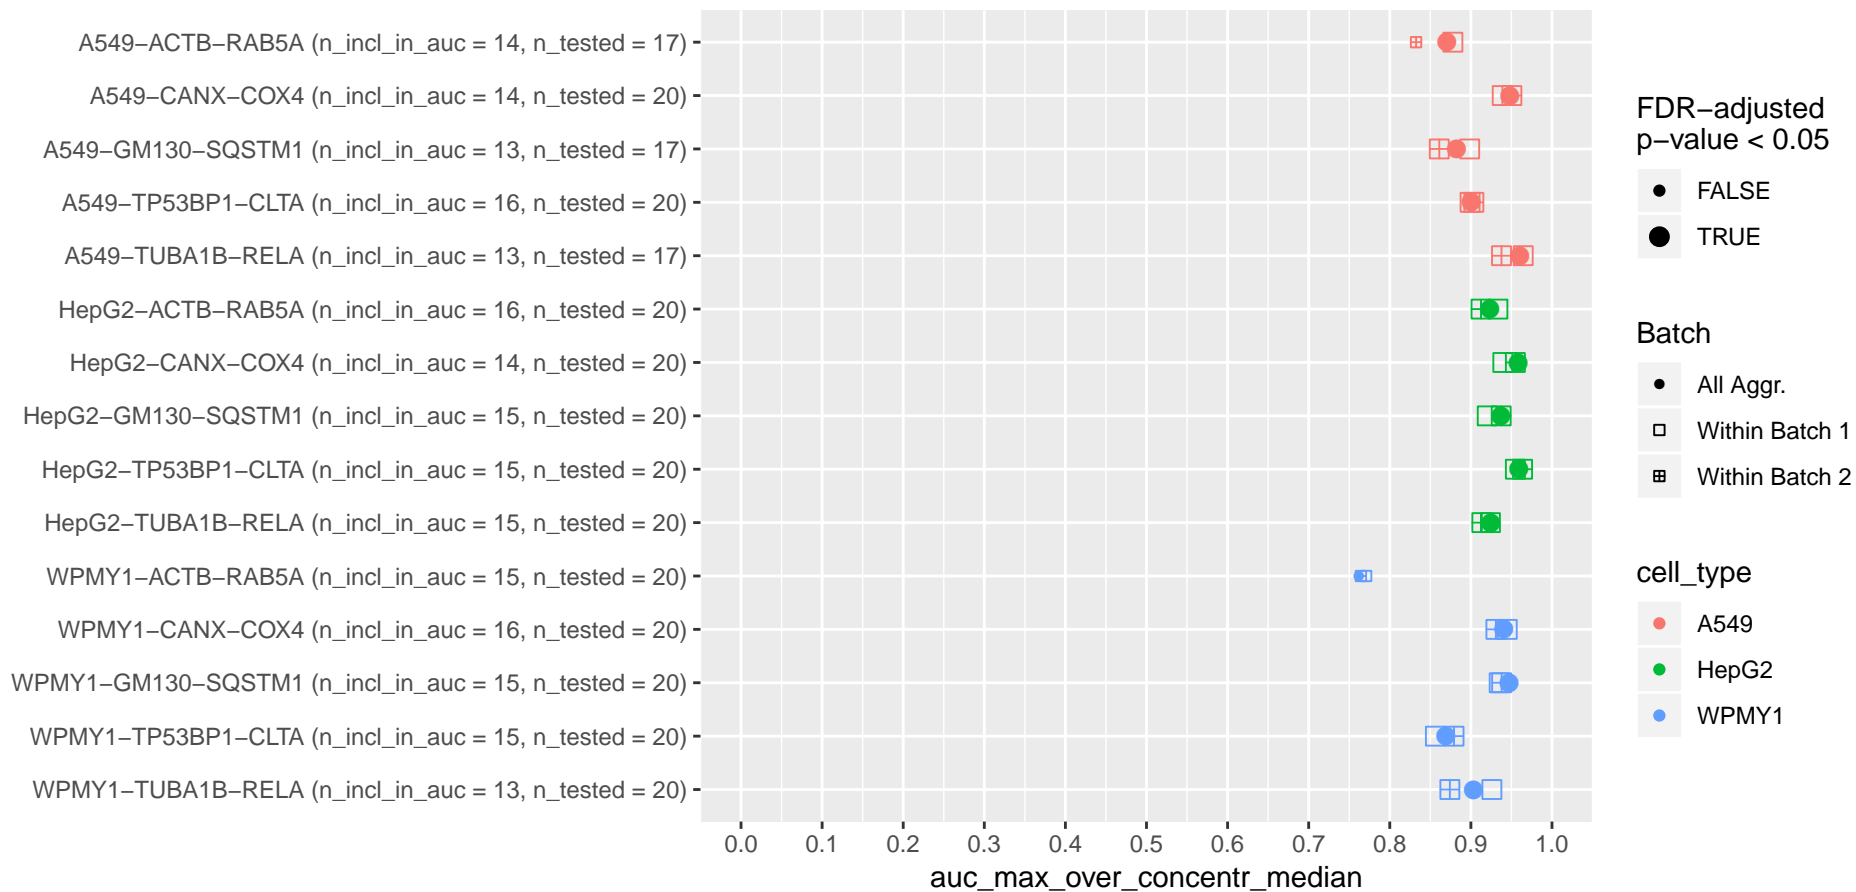

# PKA<sup>inhibitor</sup>

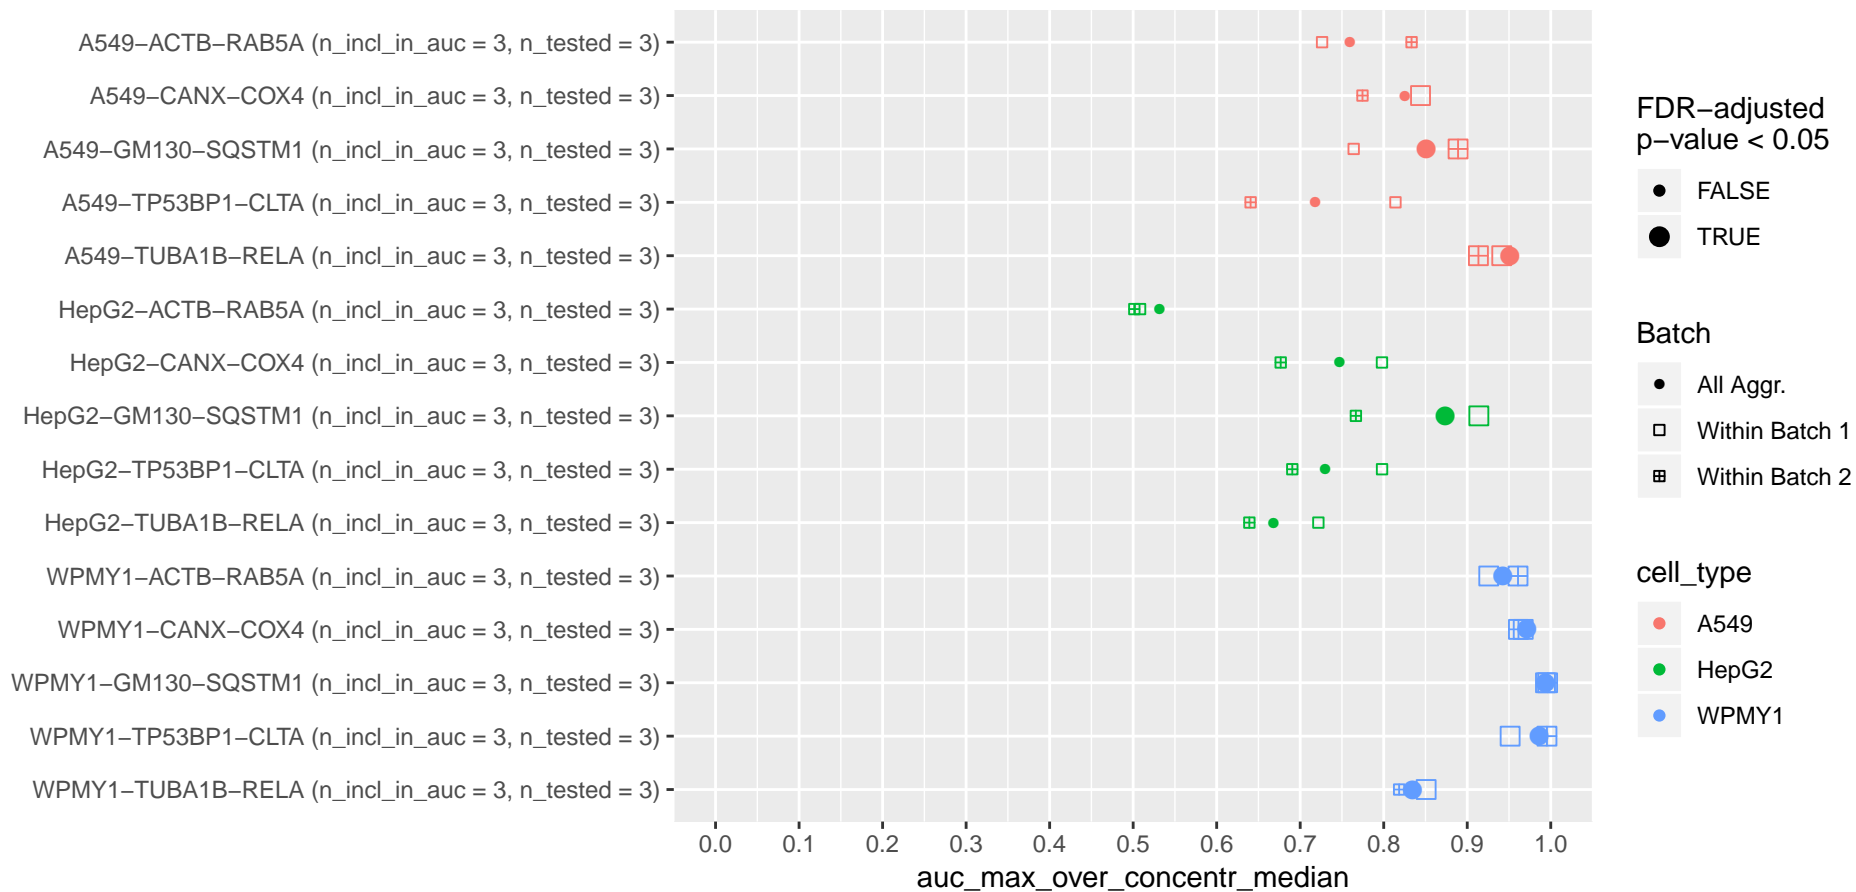



# PKC<sup>inhibitor</sup>

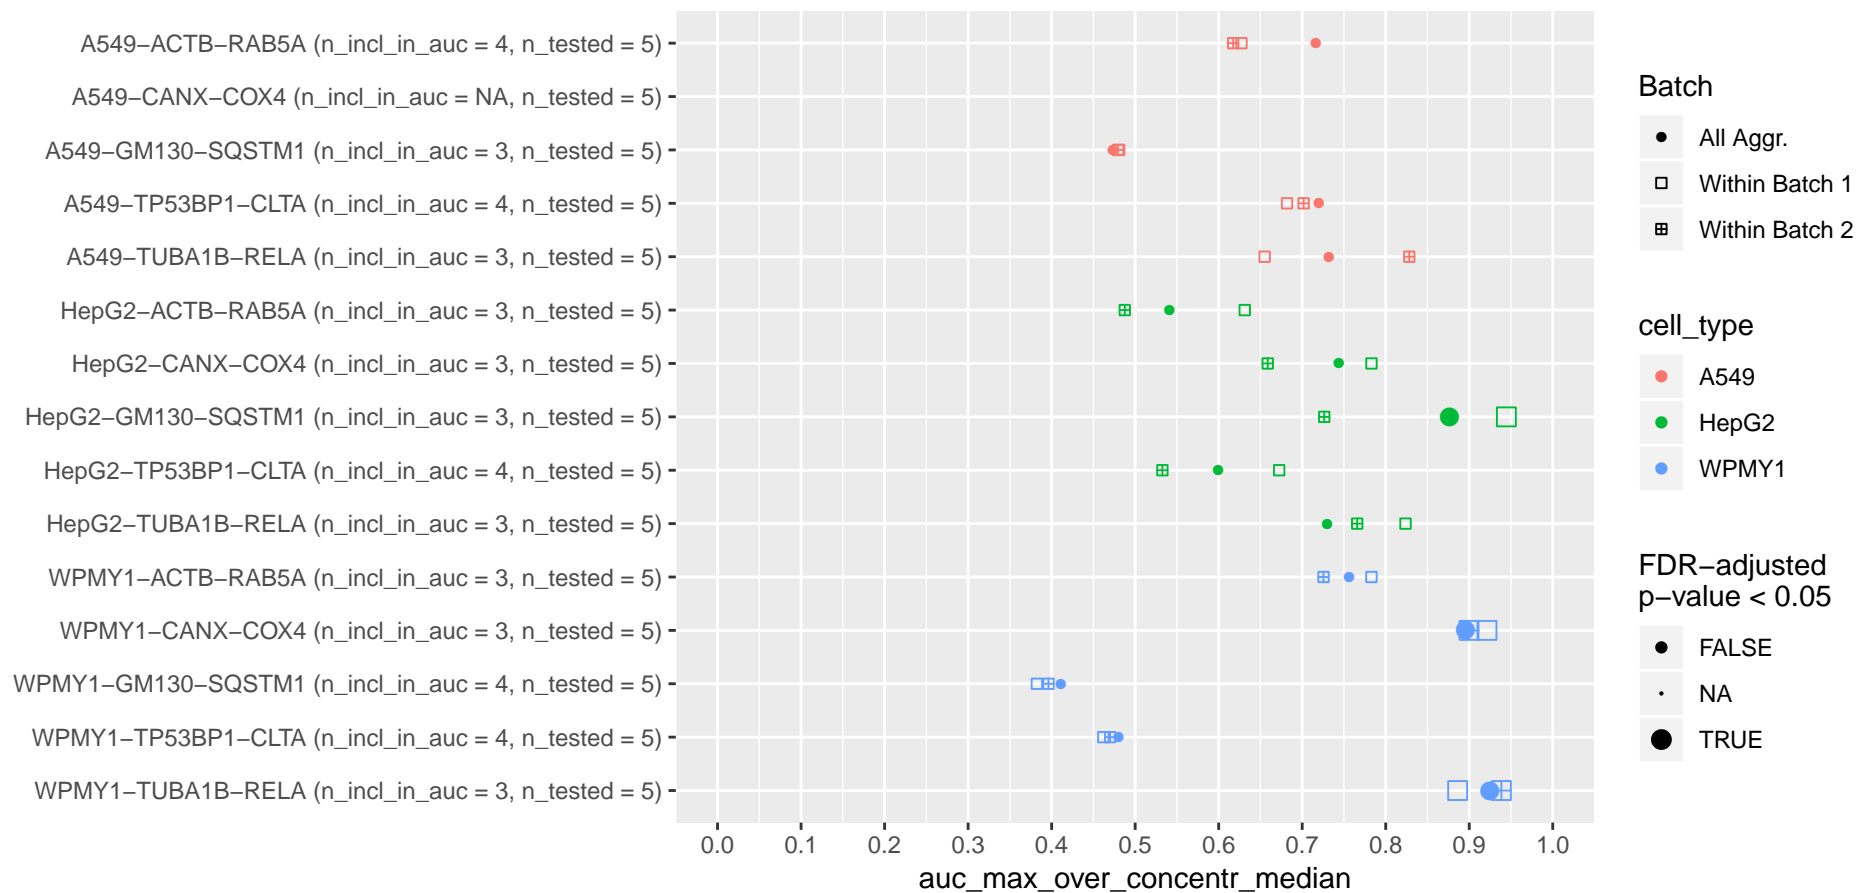

# PKD<sup>Δ</sup>inhibitor

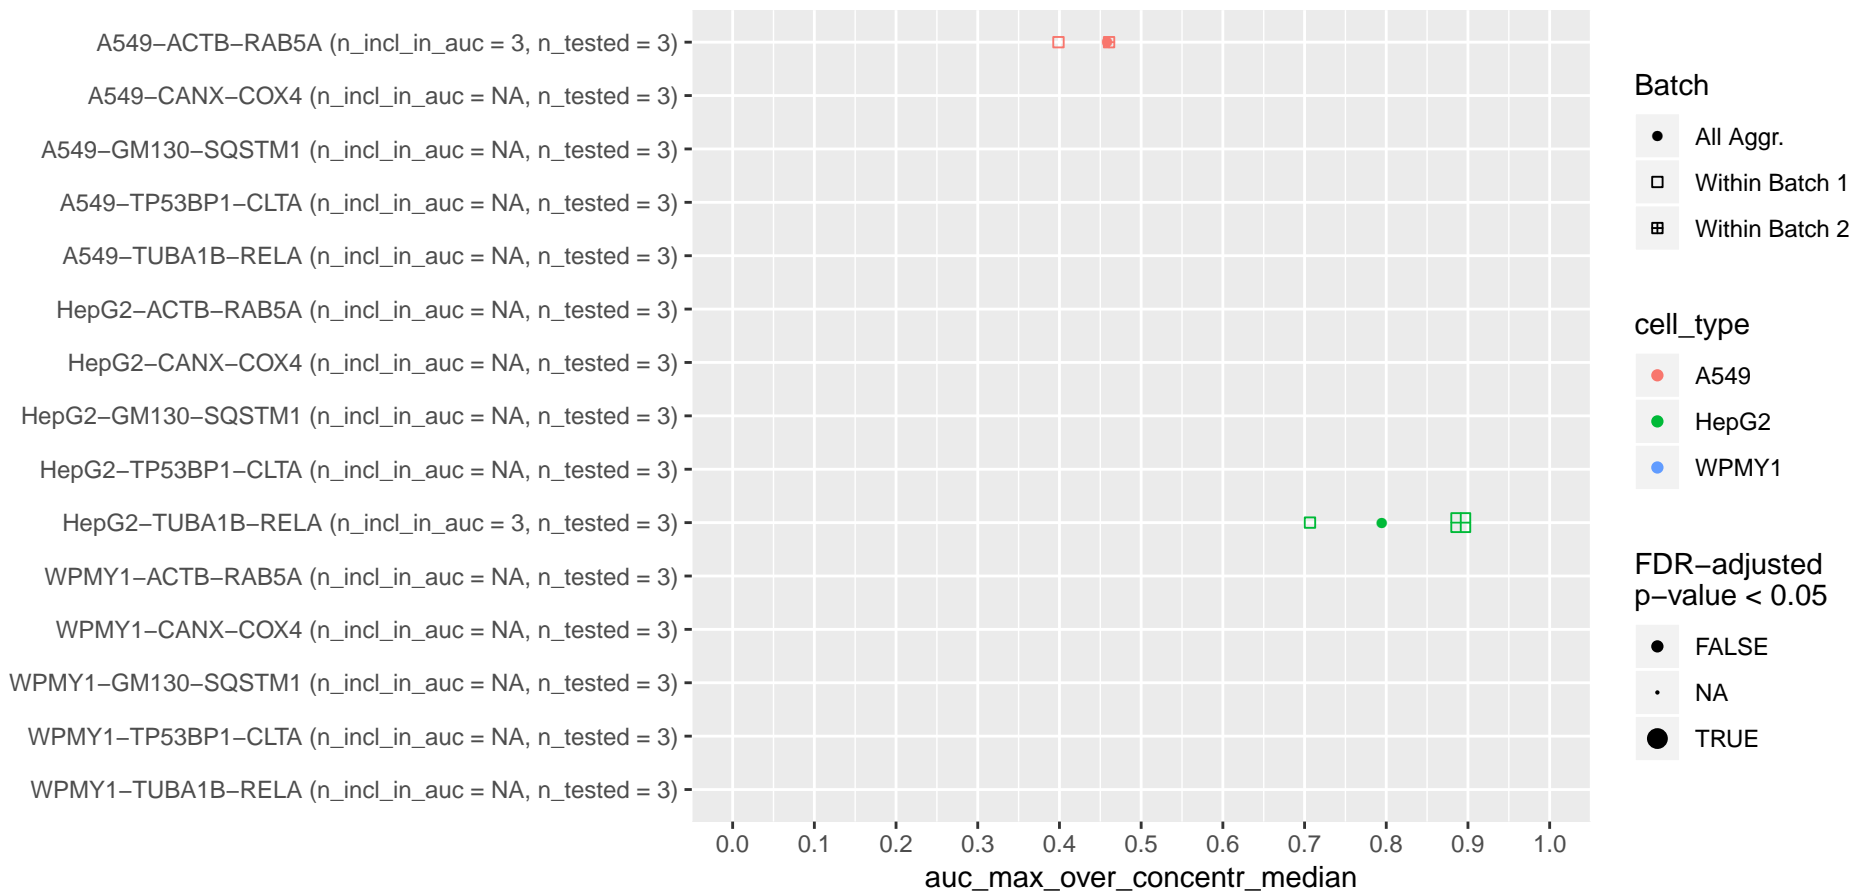

# Phospholipase<sup>i</sup>inhibitor

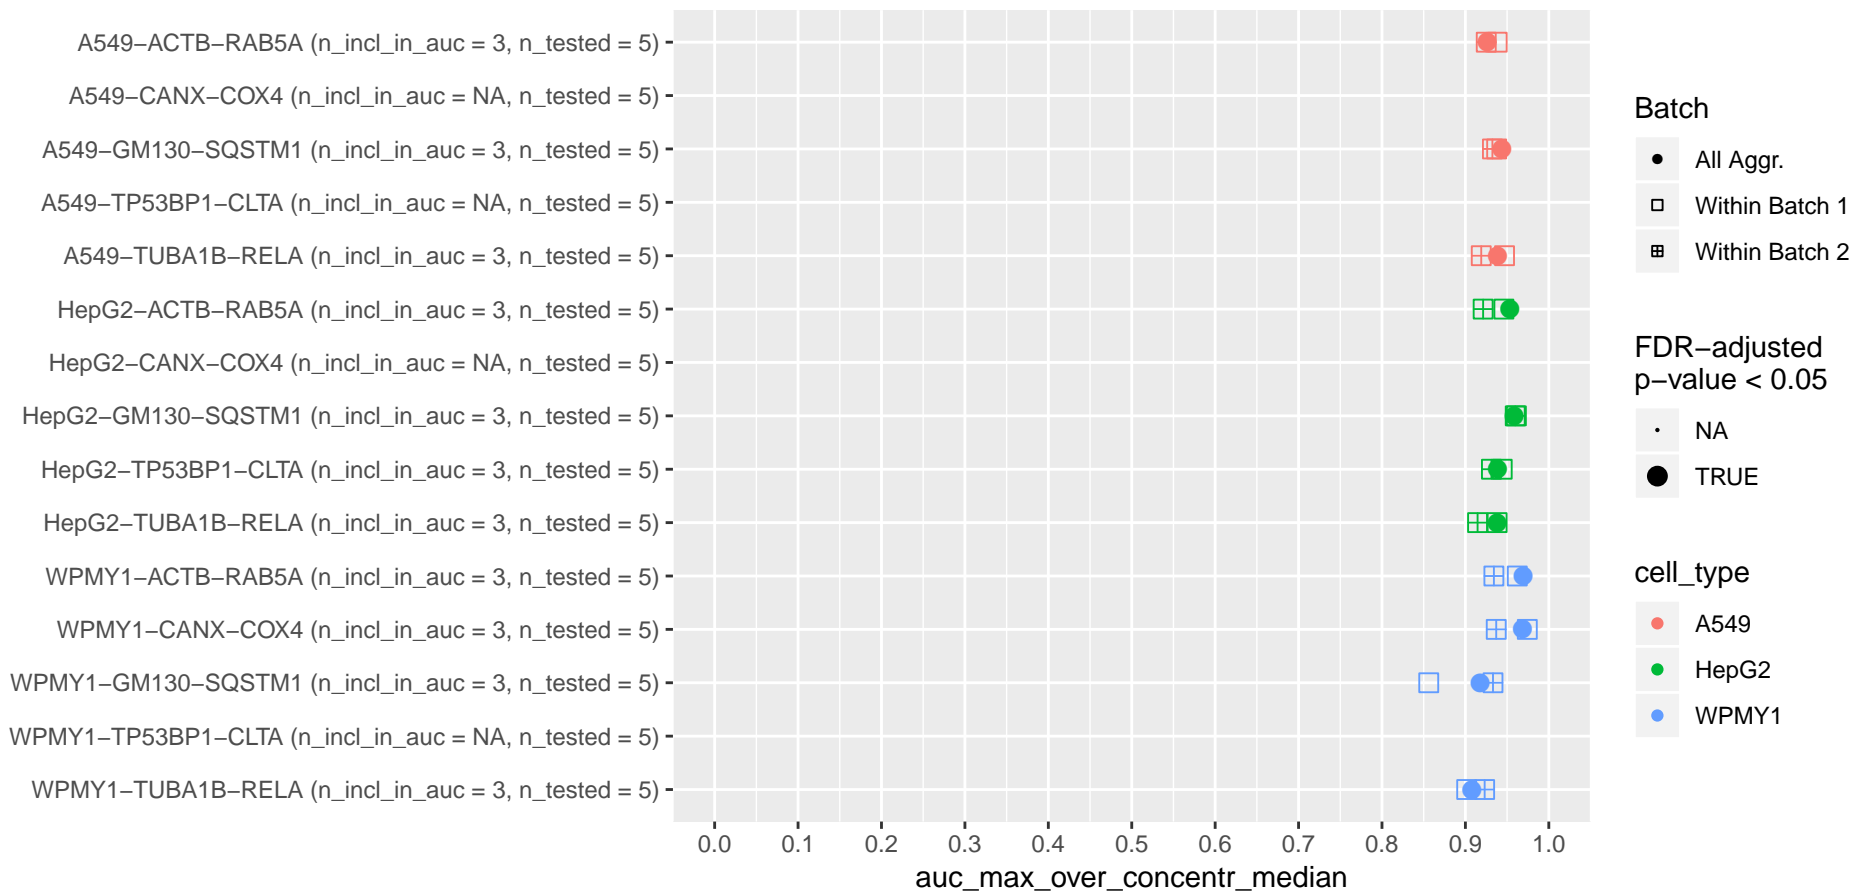

# Polo-like kinase<sup>inhibitor</sup>

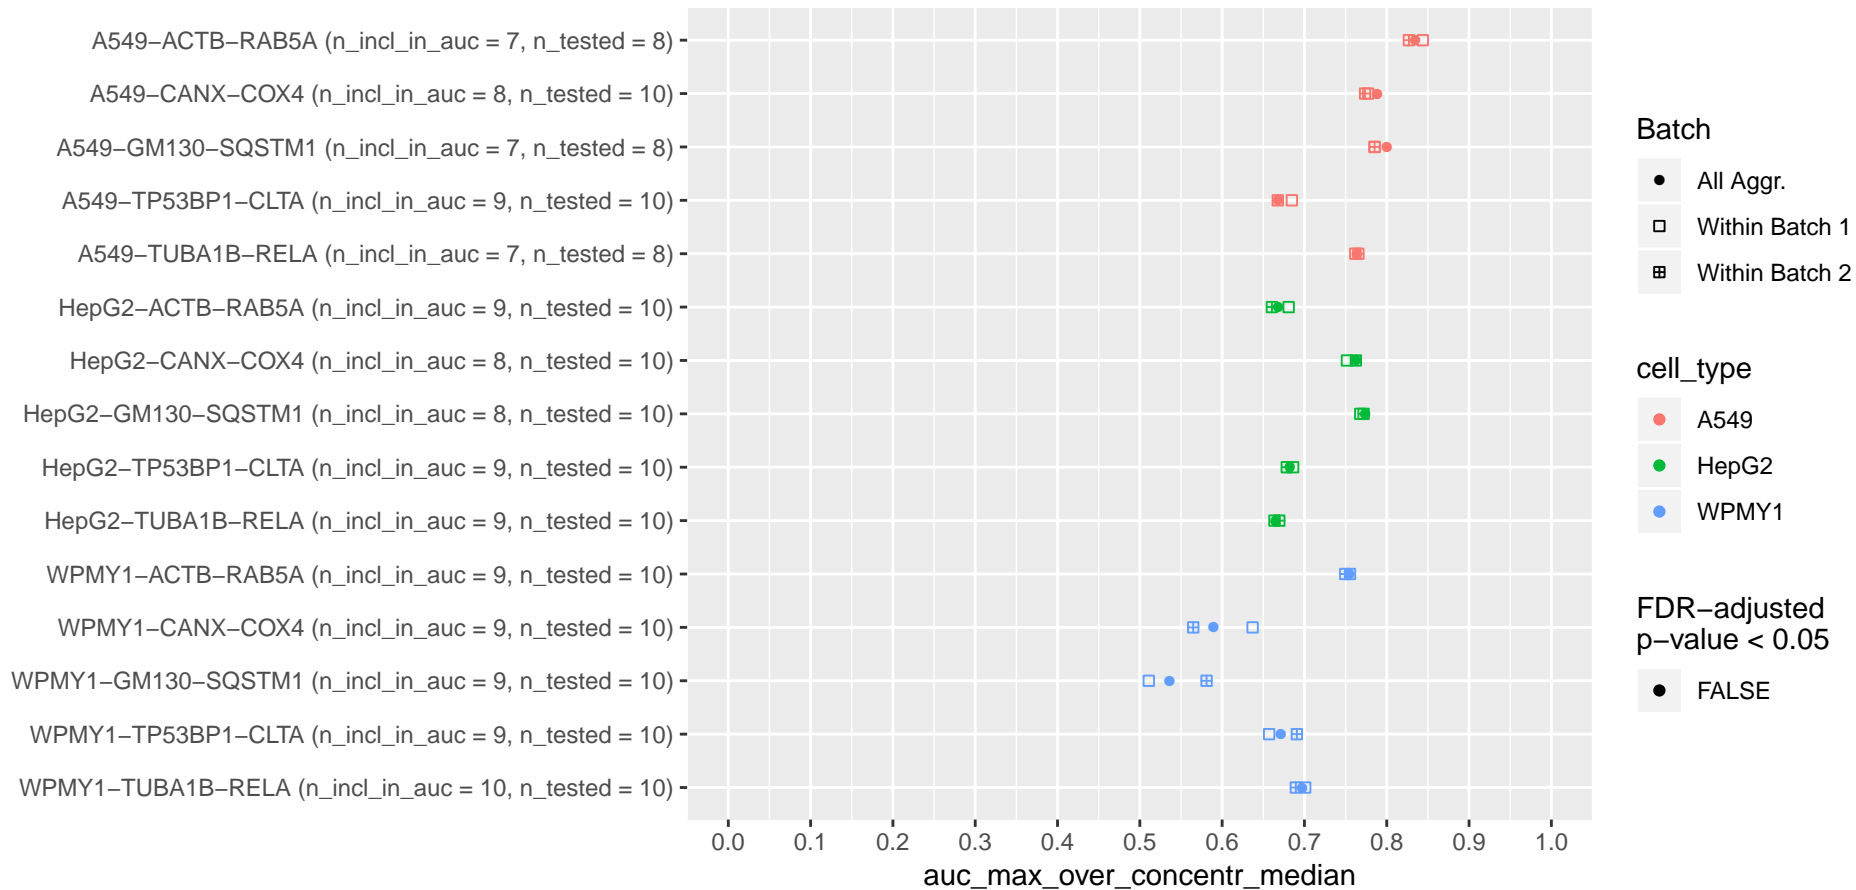

RET RTK<sup>inhibitor</sup>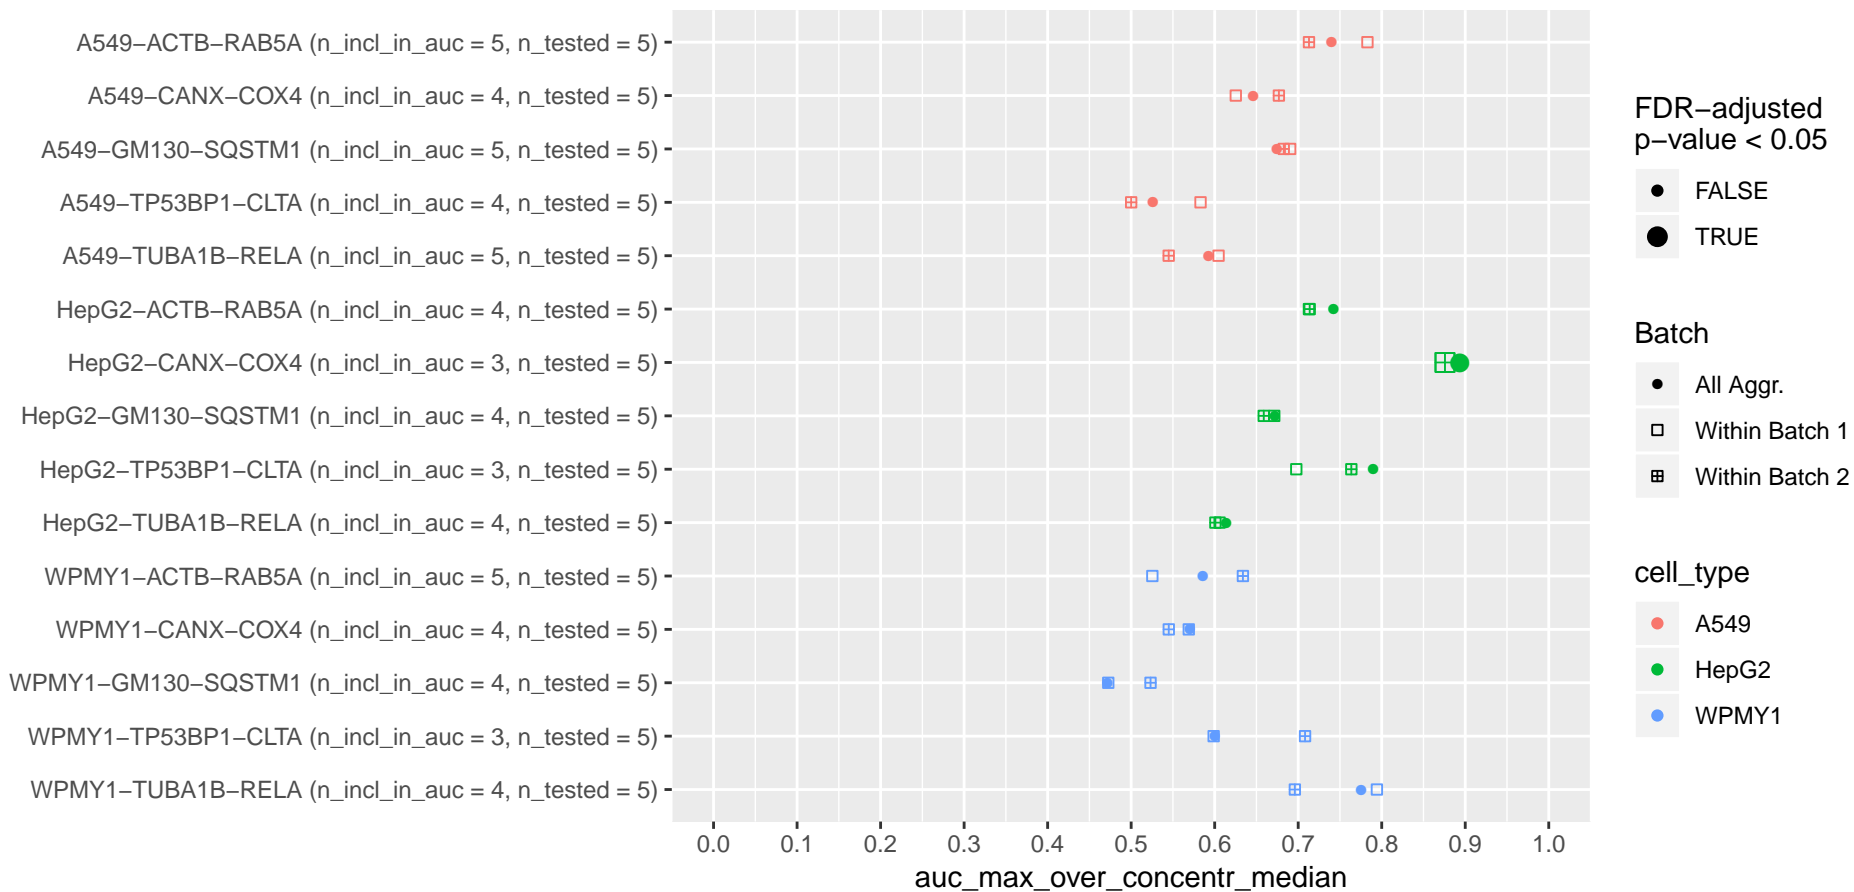

# RNA synthesis<sup>in</sup>hibitor

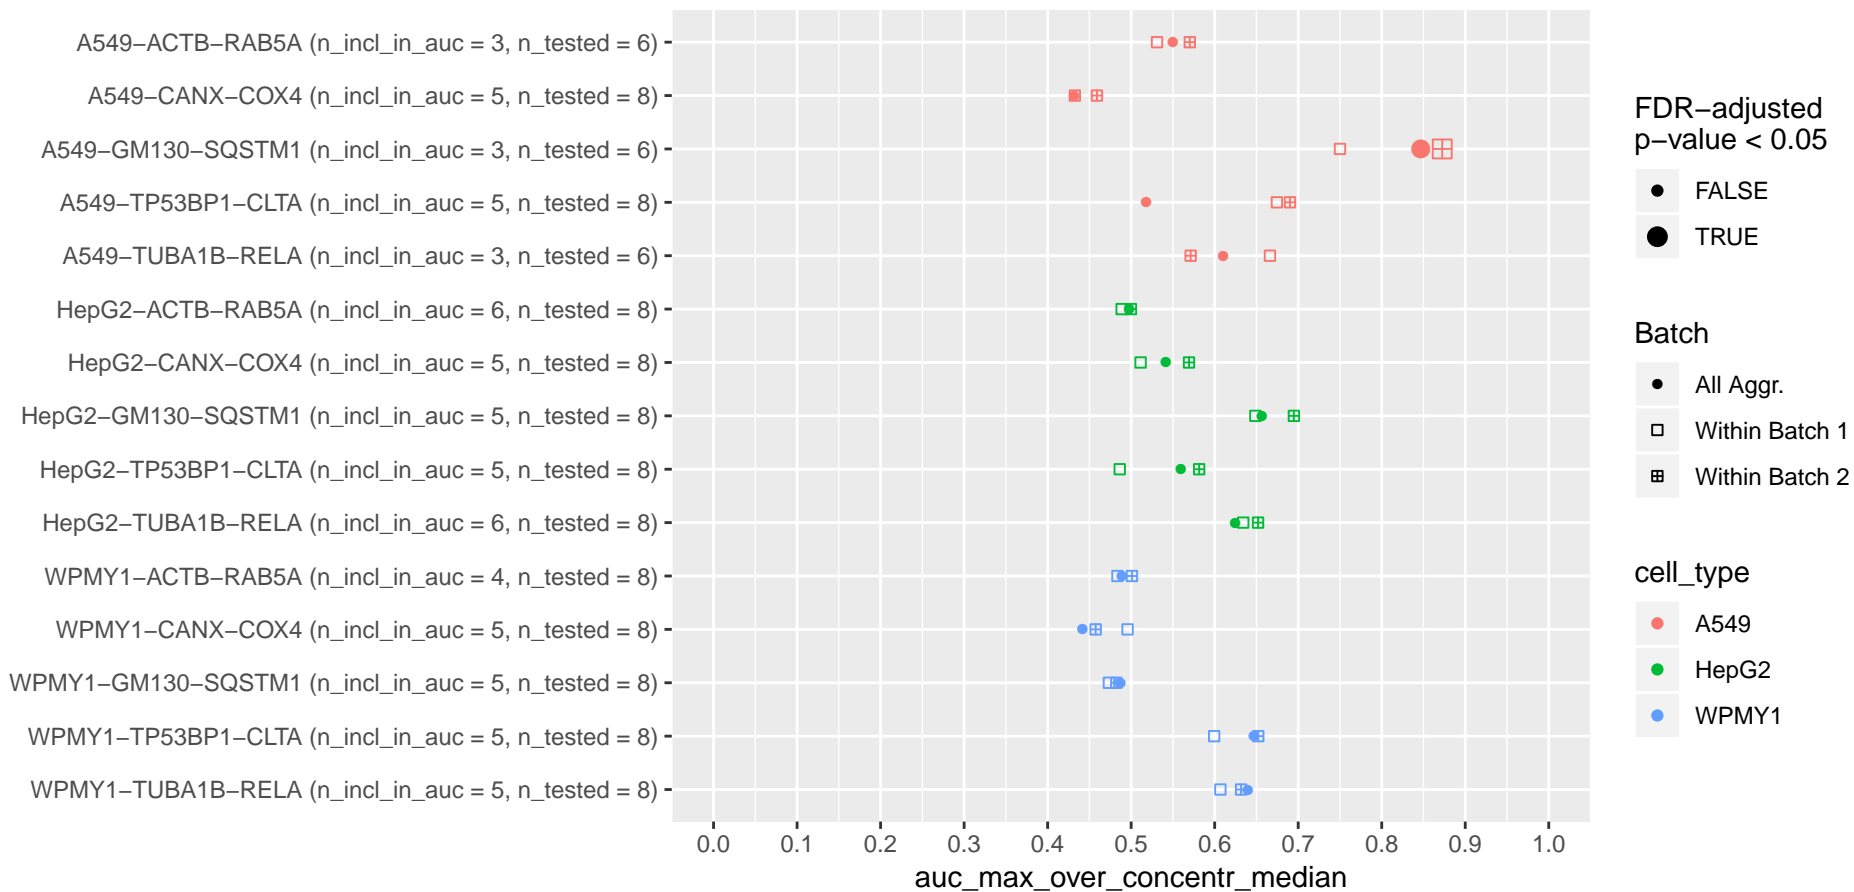

# Raf<sup>inhibitor</sup>

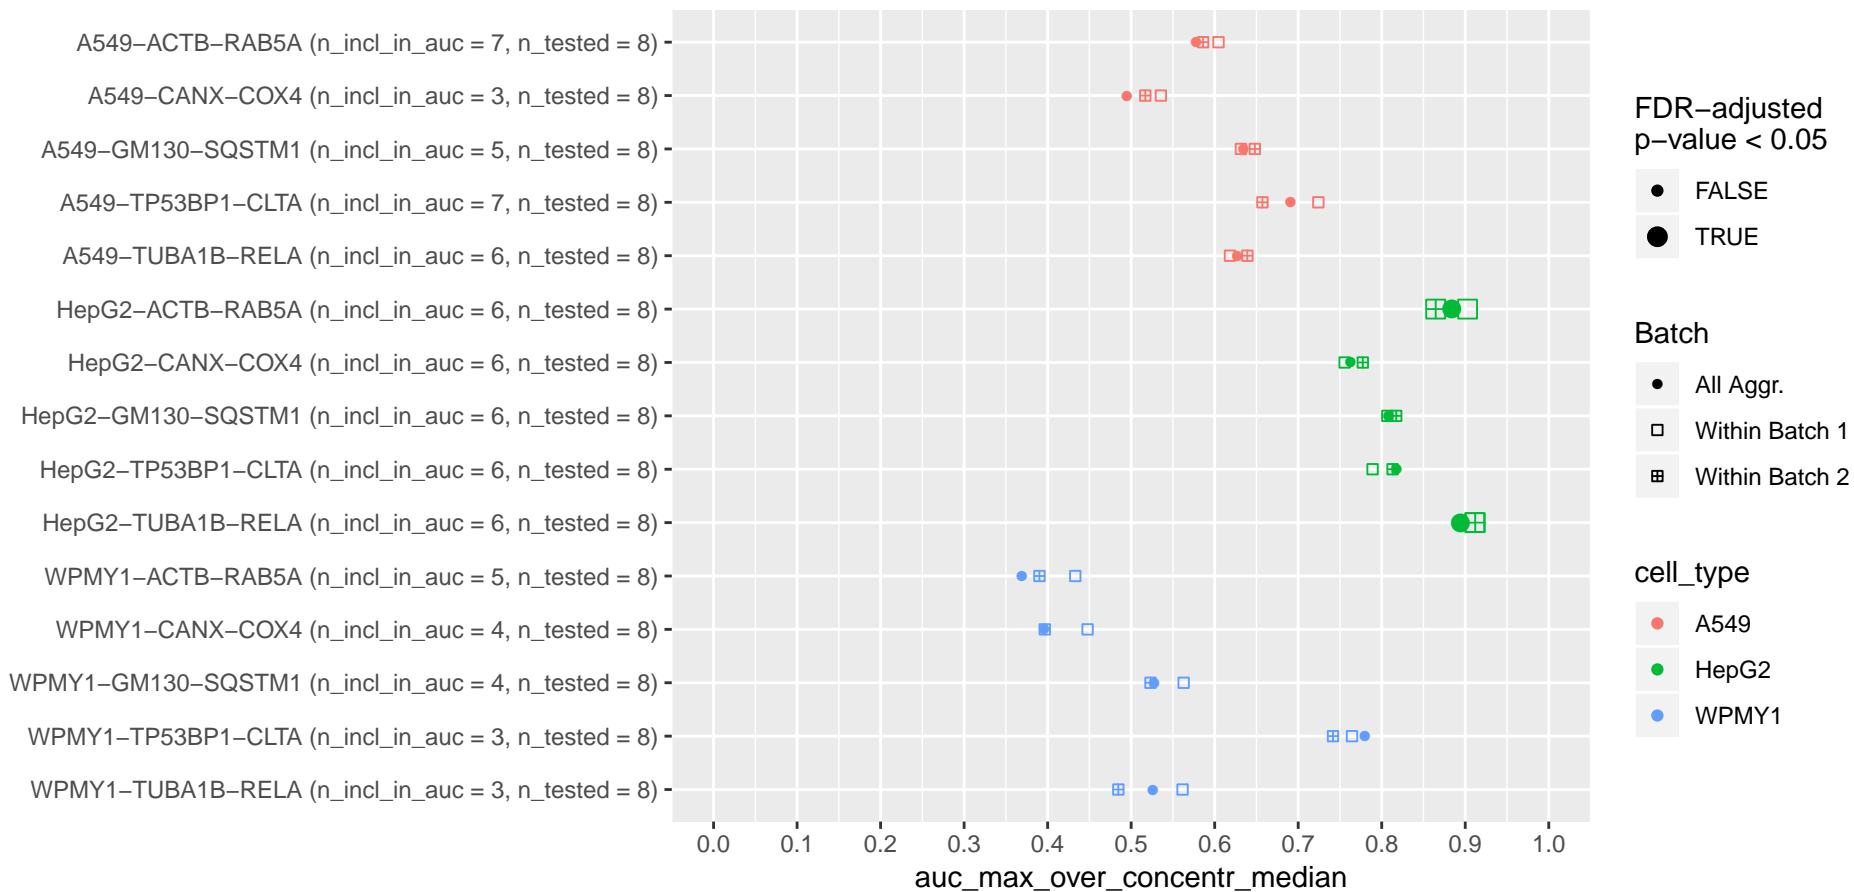

# Respiratory chain^inhibitor

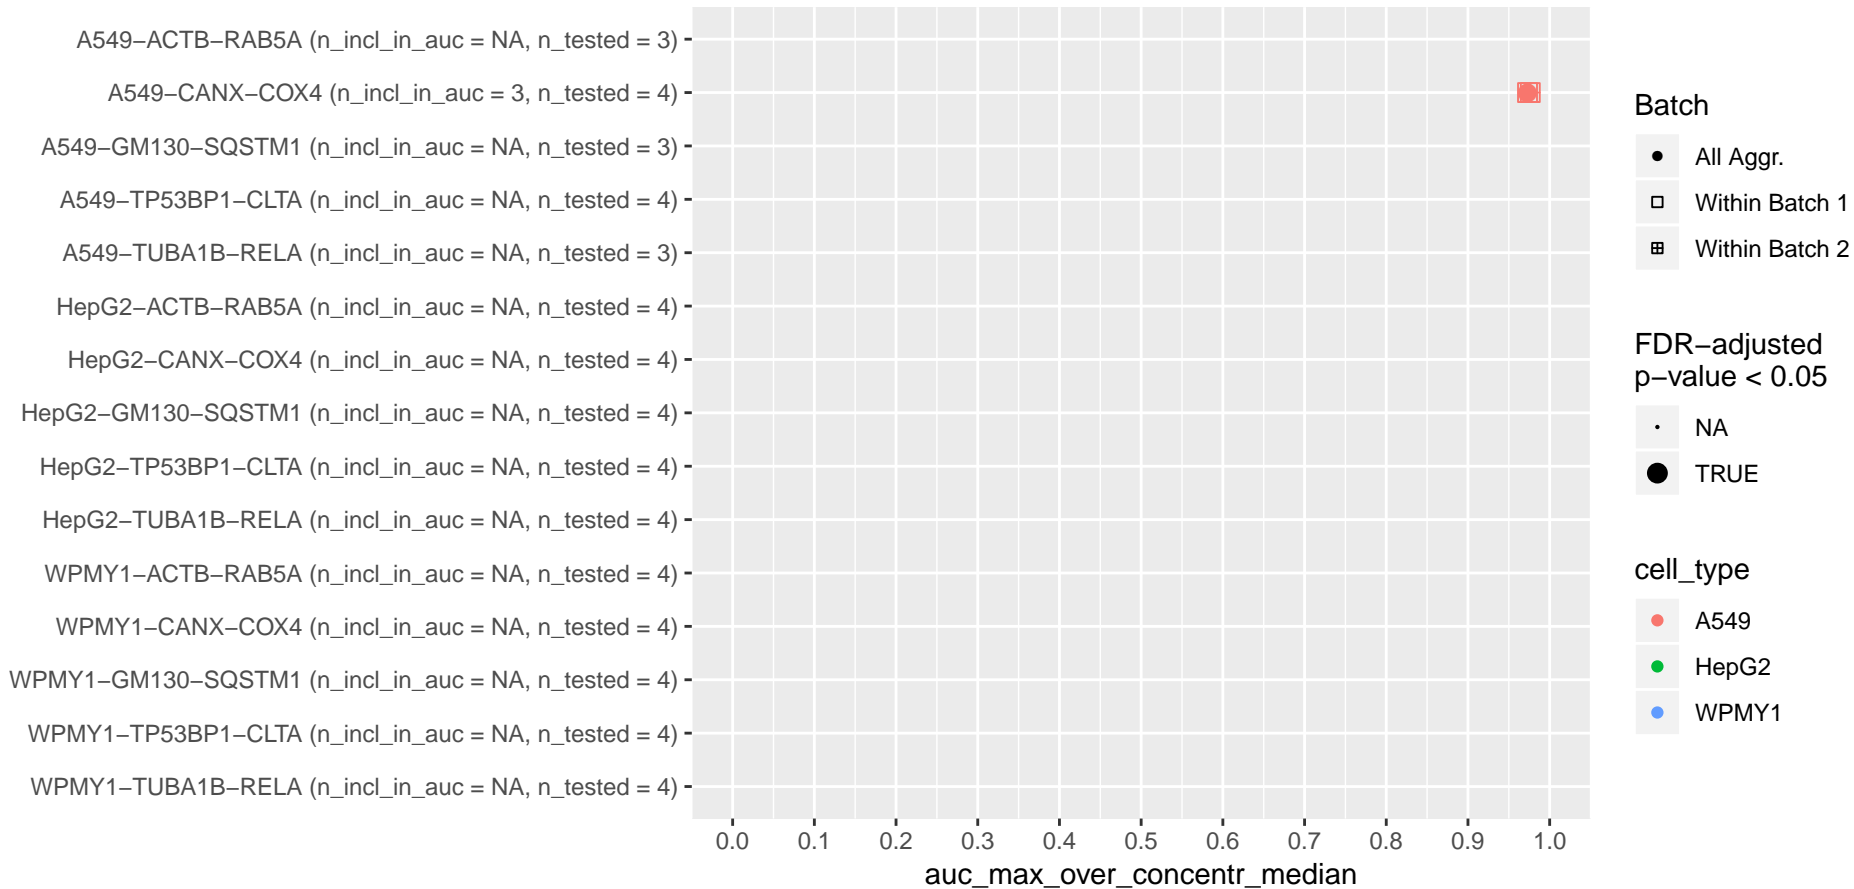



# Retinoic acid receptor^agonist

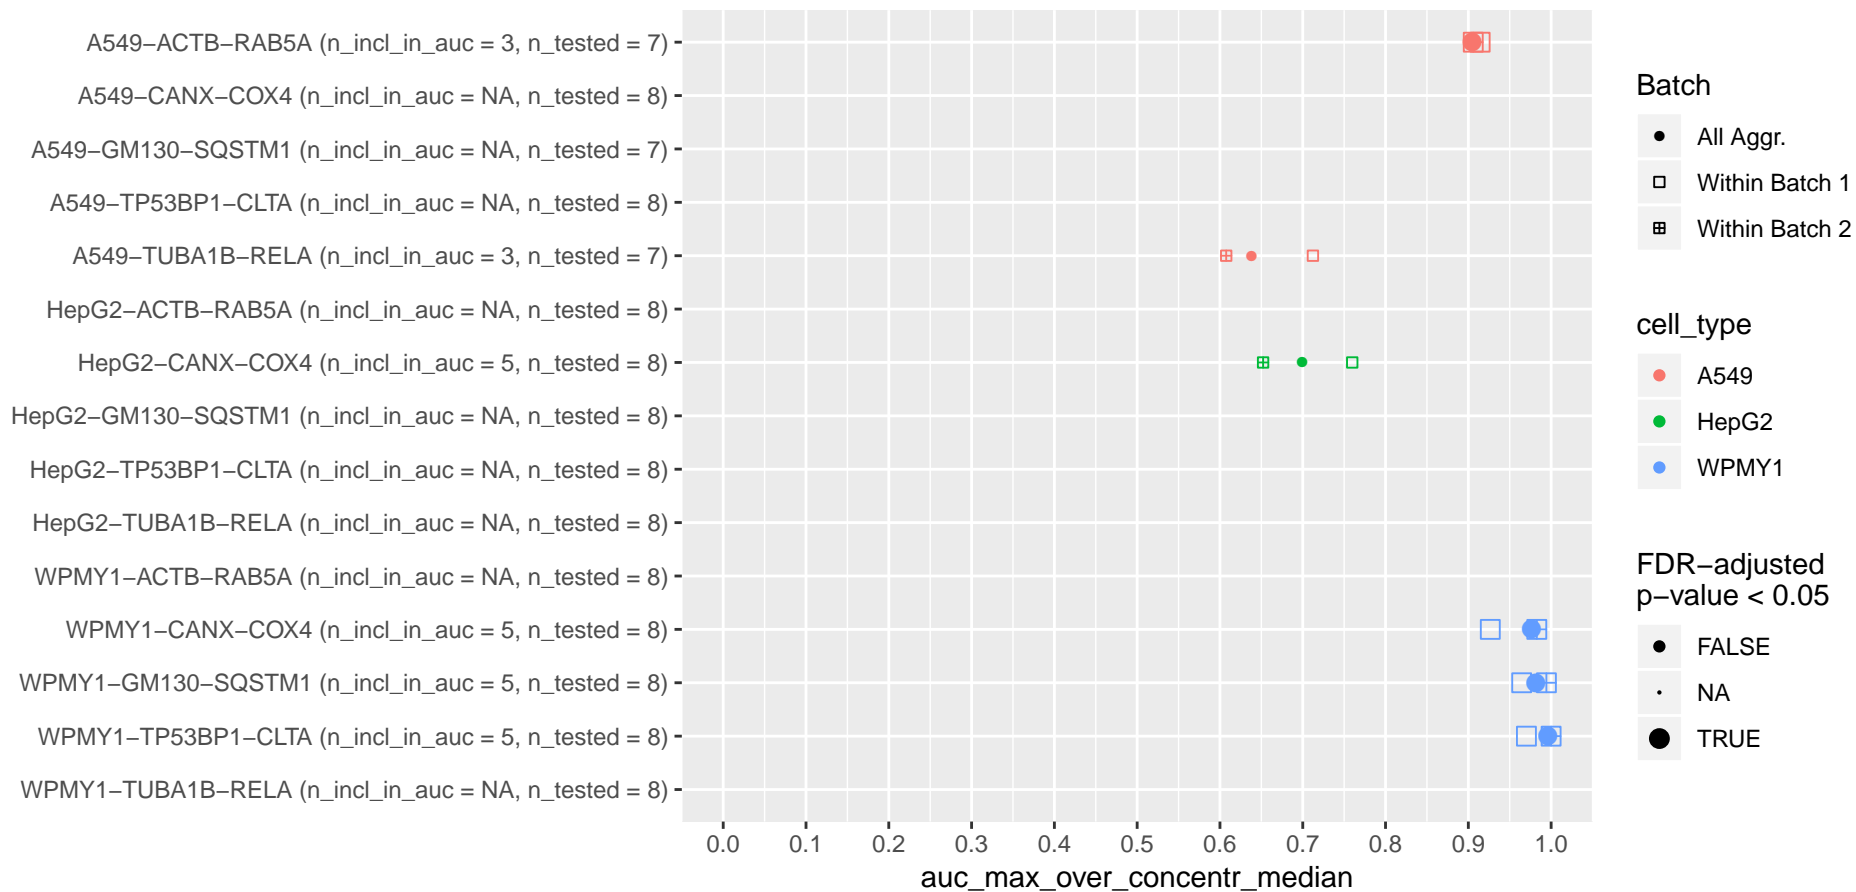

# Rho associated kinase<sup>inhibitor</sup>

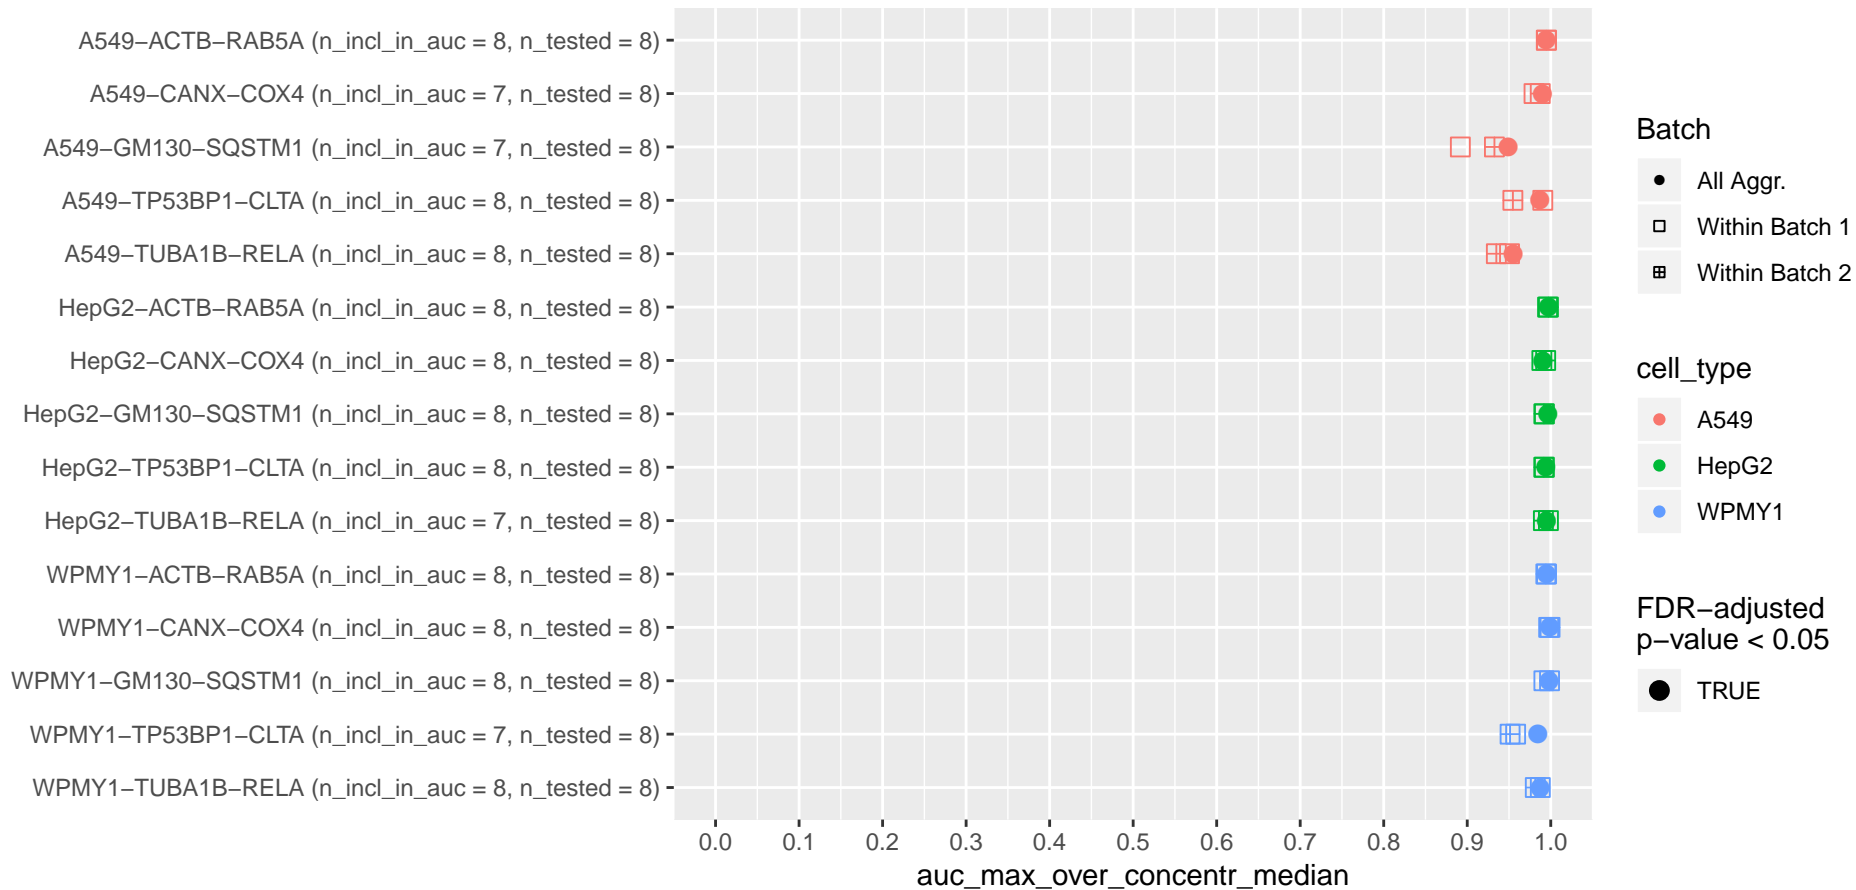

# Serotonin receptor^agonist

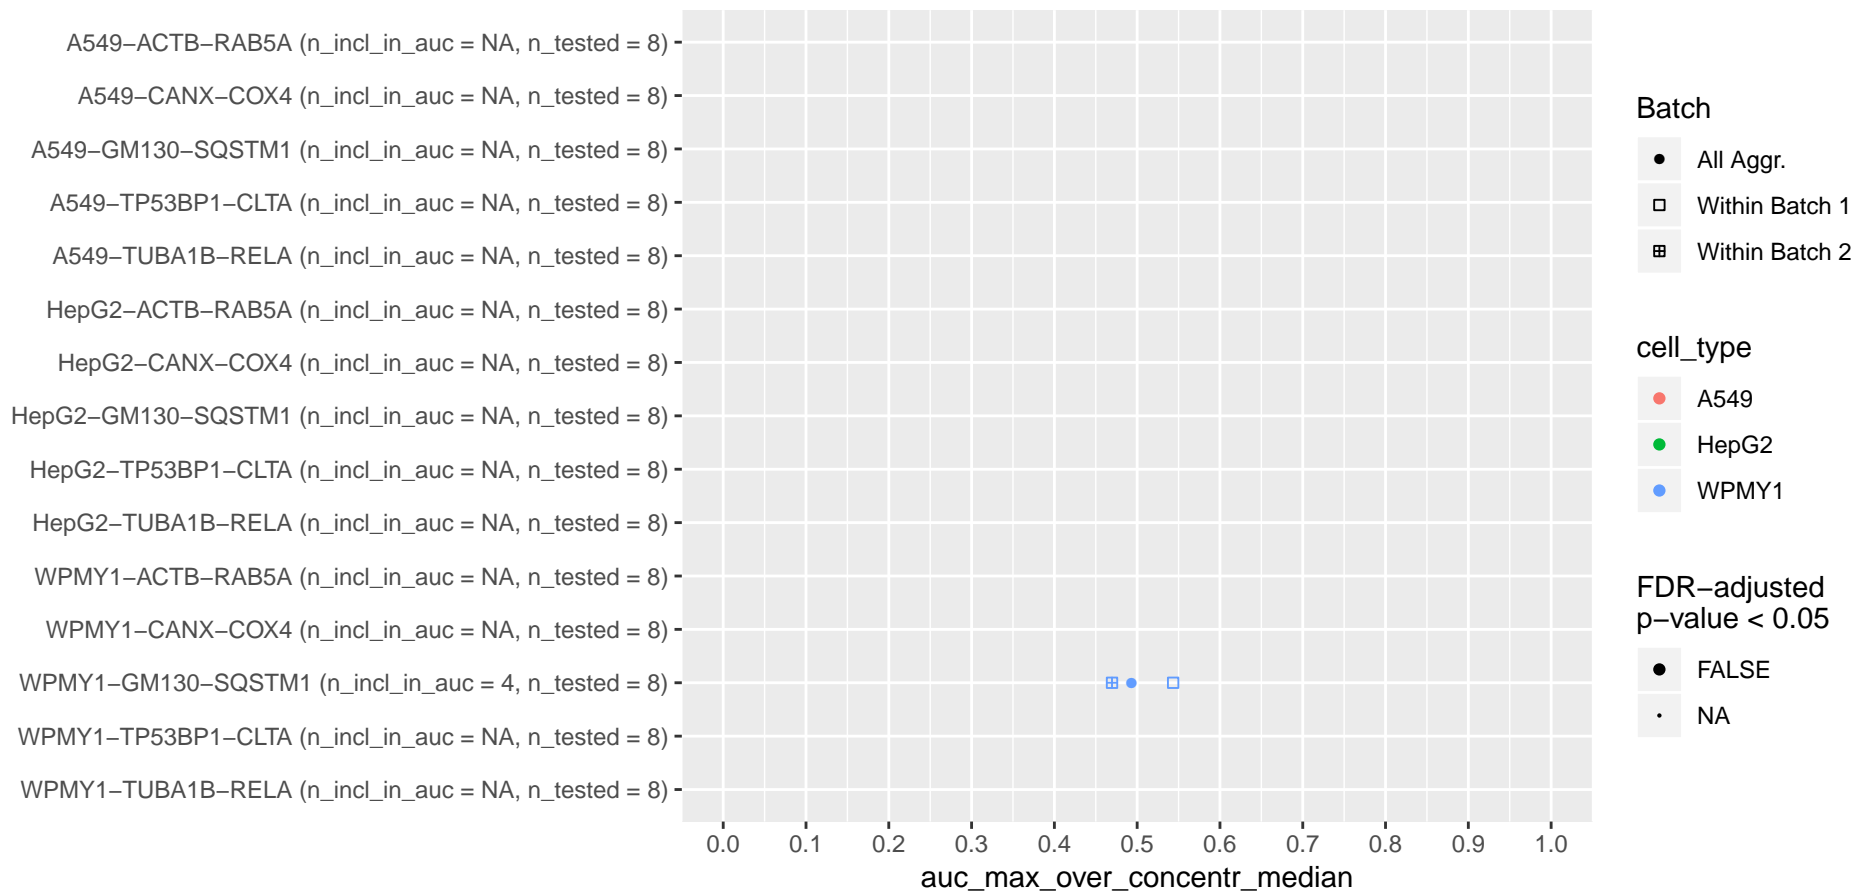

# Serotonin receptor^antagonist

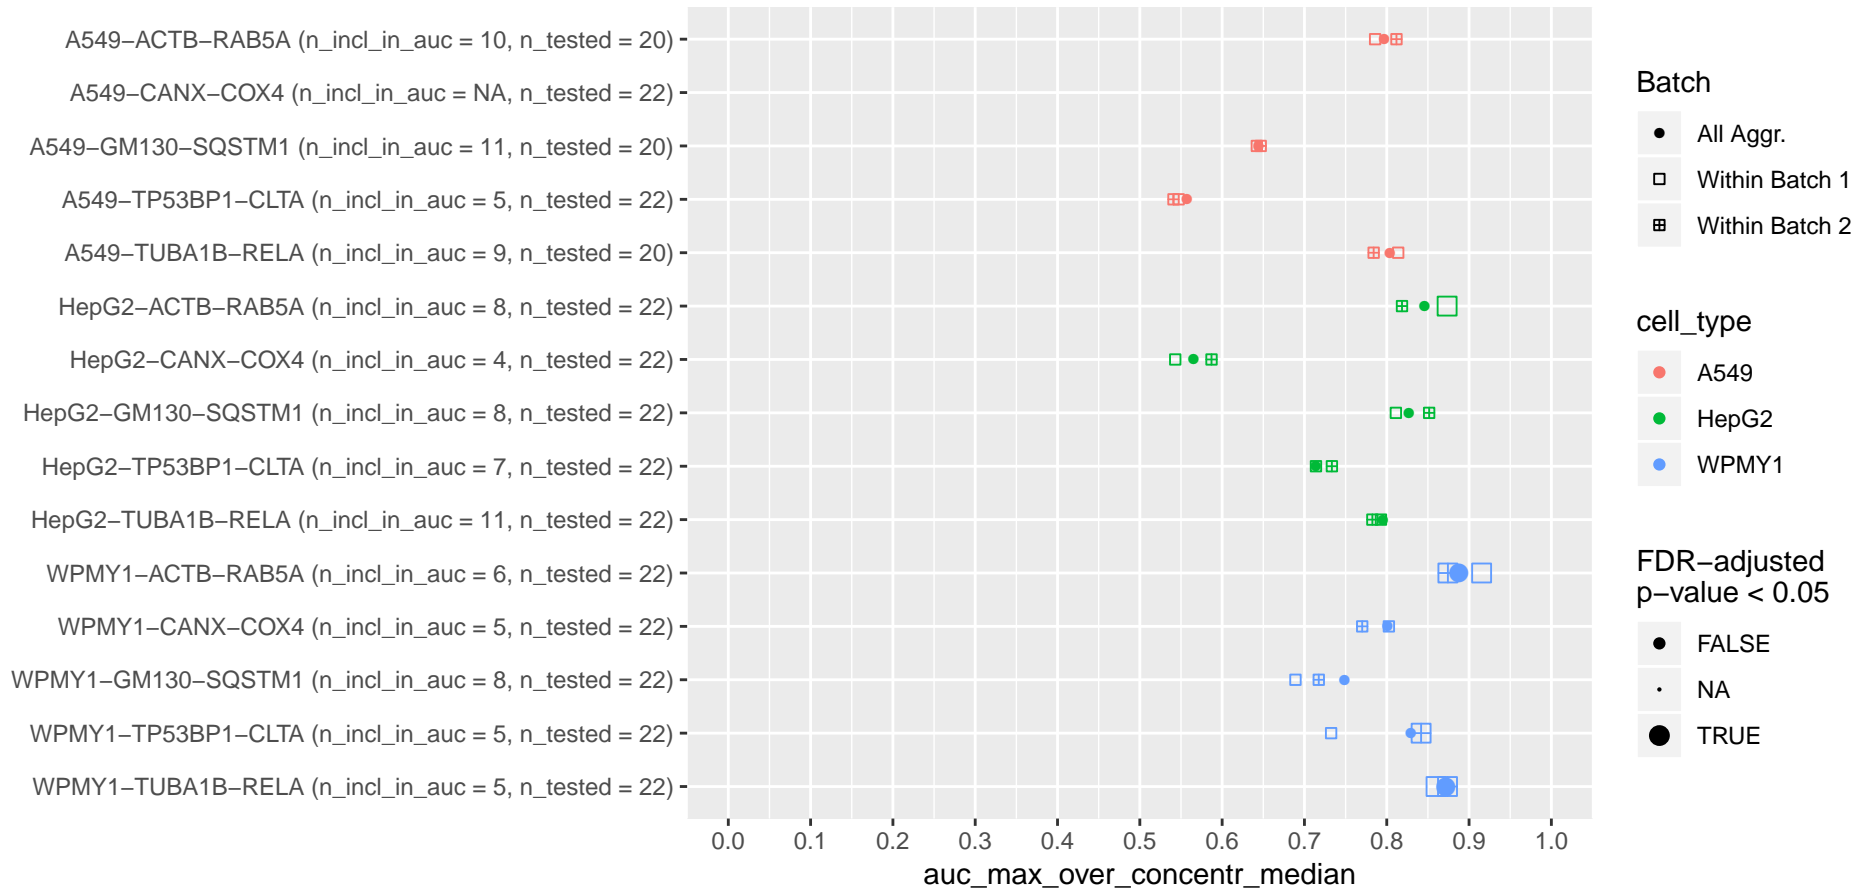

# Sphingosine kinase<sup>1</sup>inhibitor

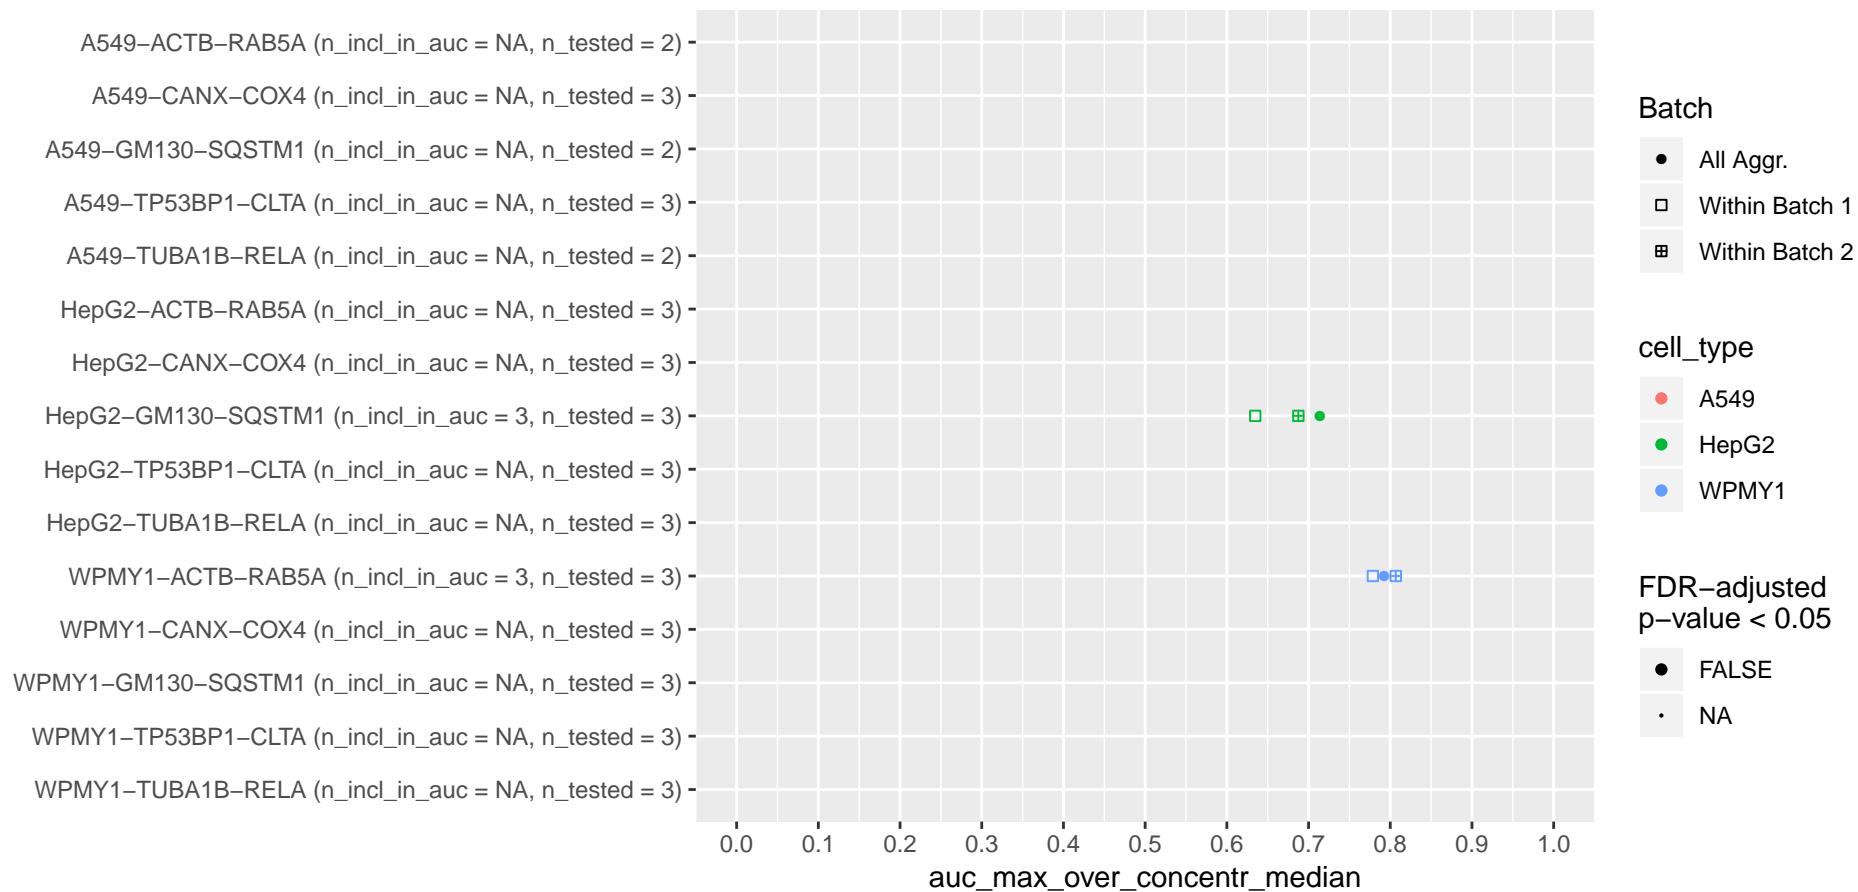

# Src family<sup>^</sup>inhibitor

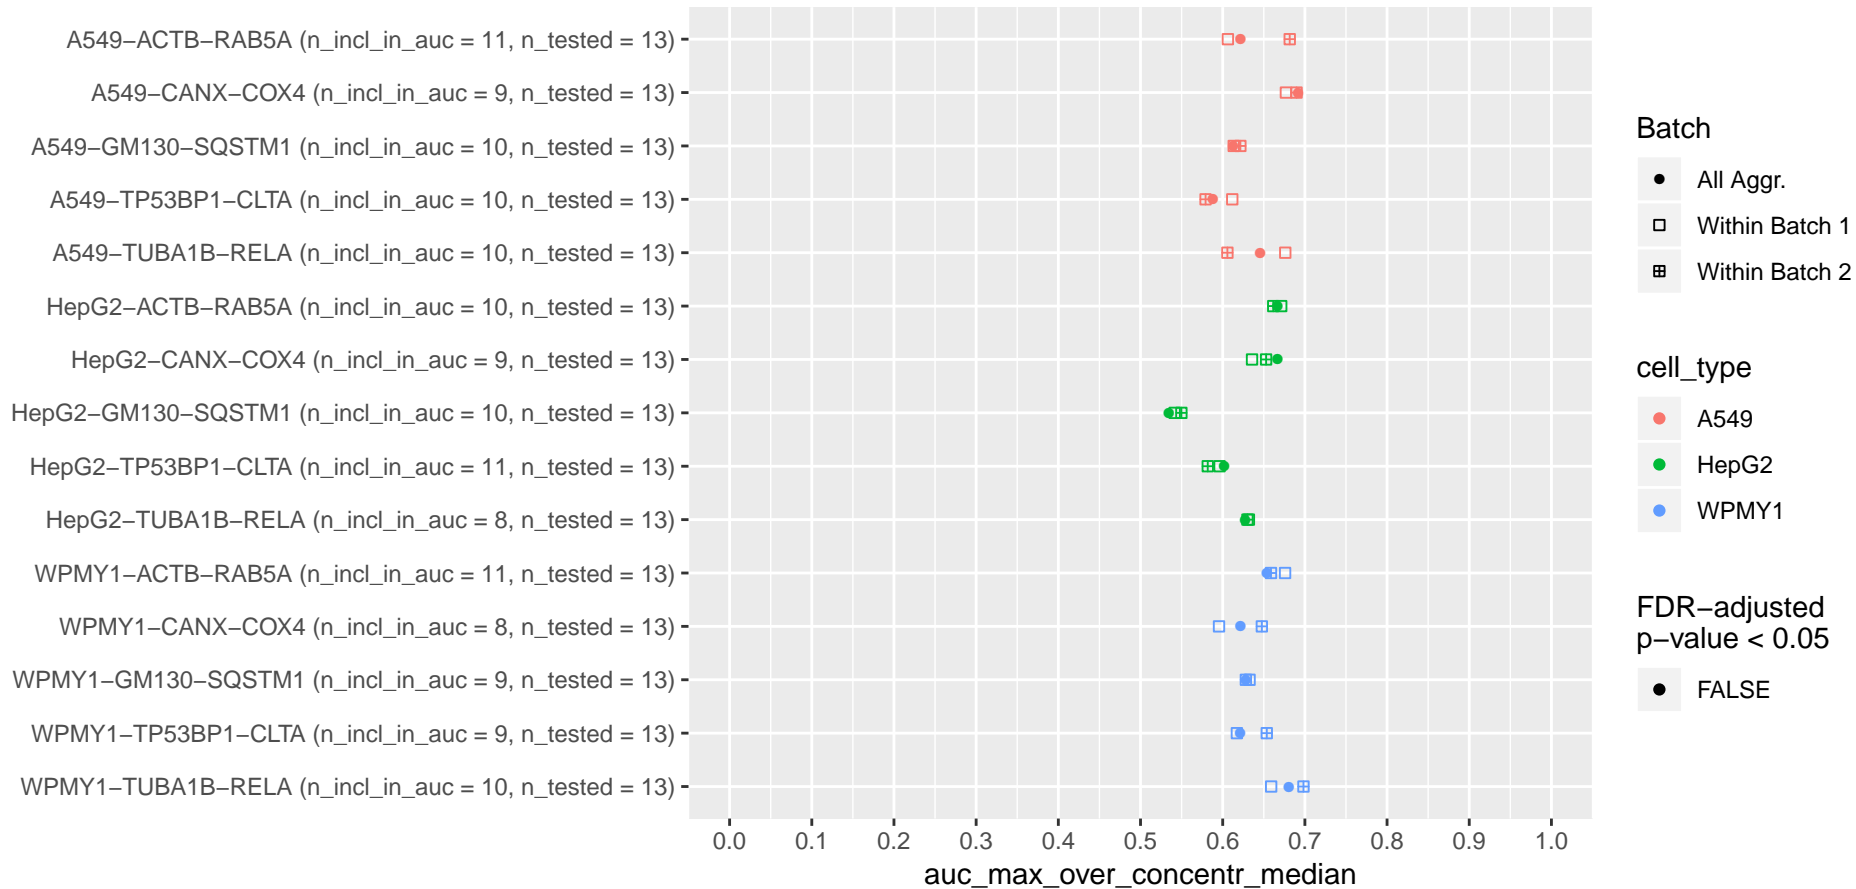

# TGF beta receptor<sup>inhibitor</sup>

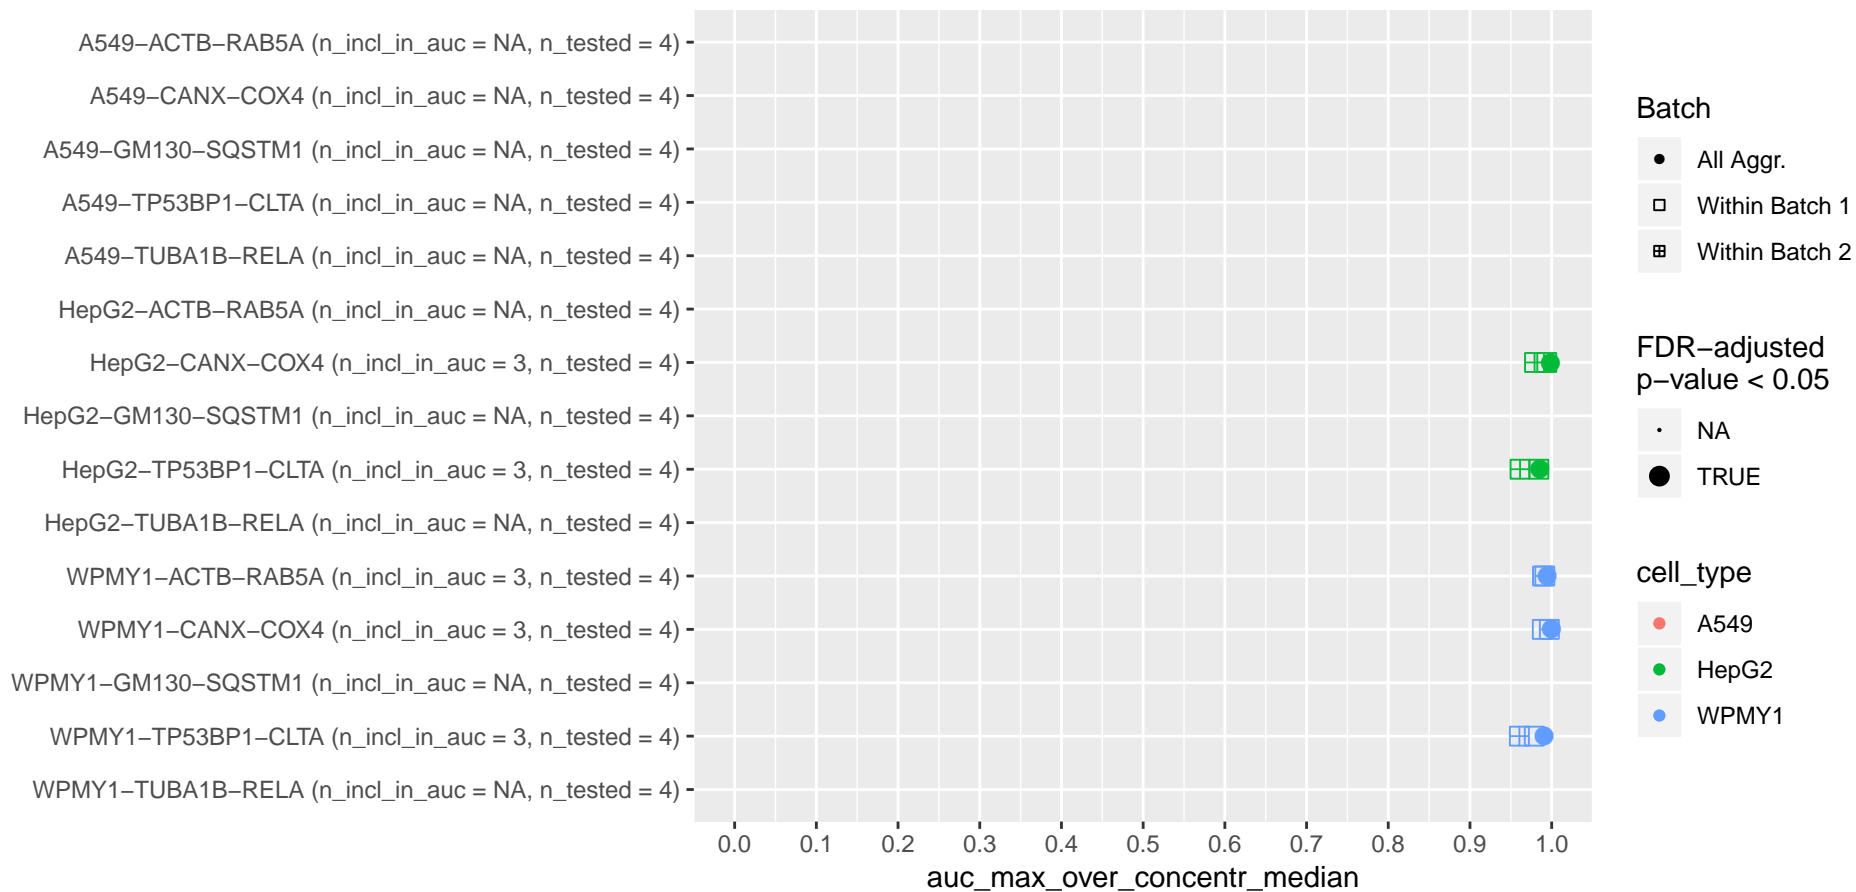

# Topoisomerase<sup>^</sup>inhibitor

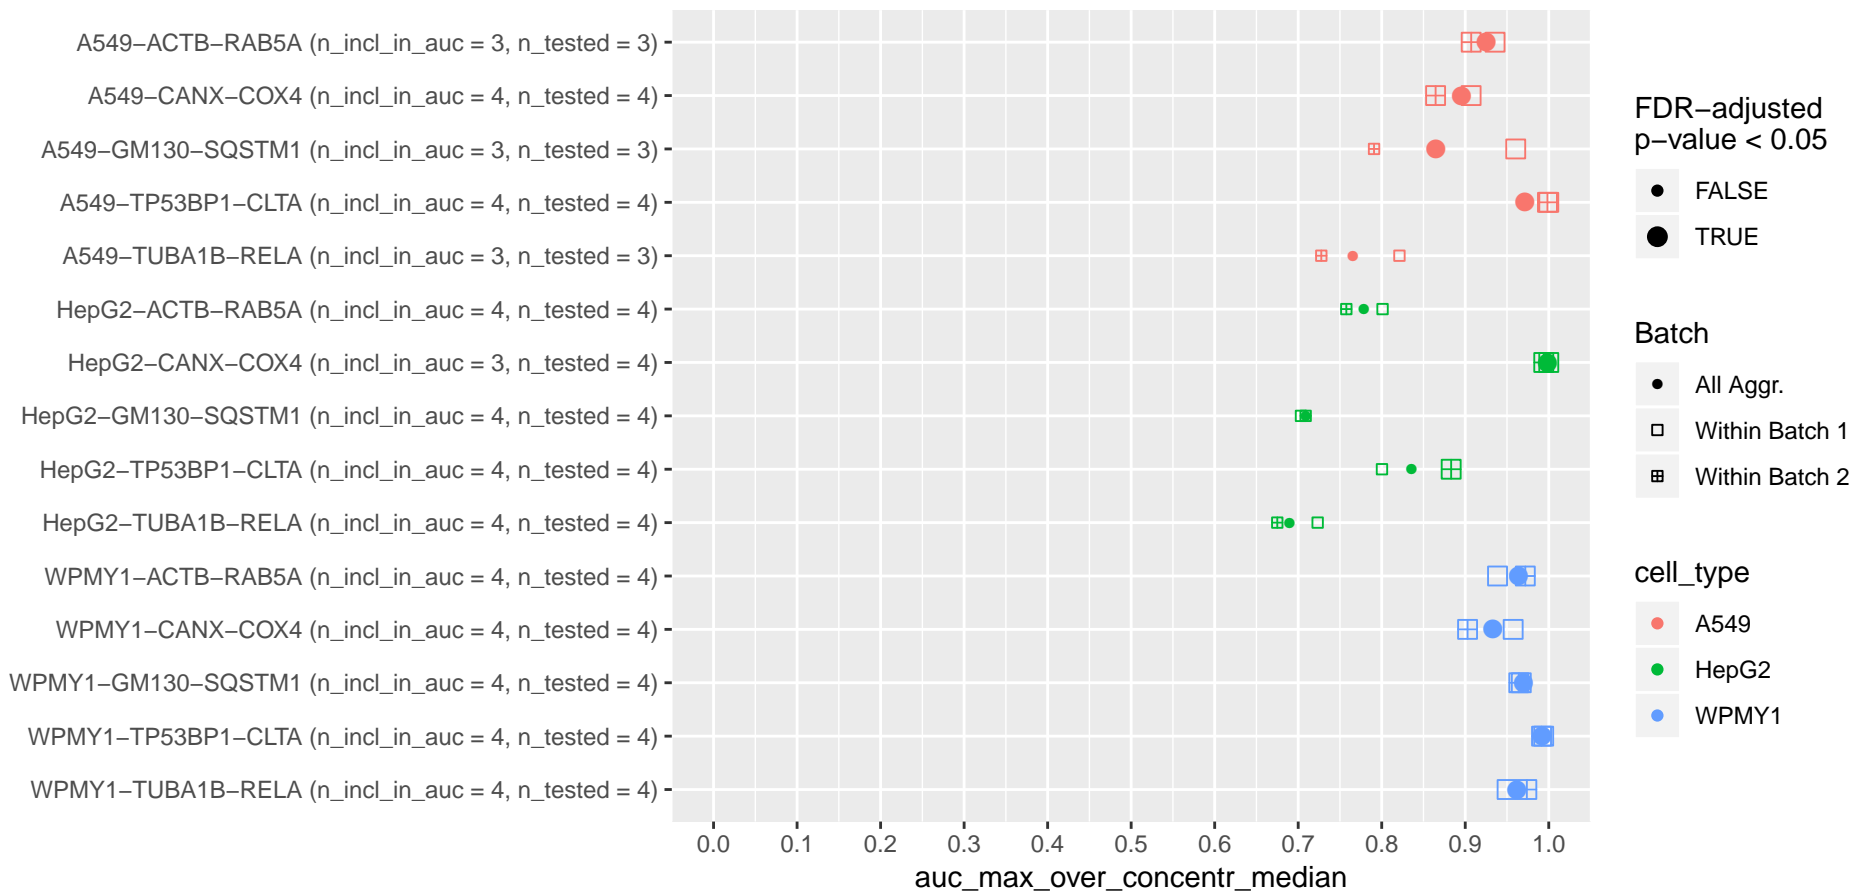



# Translation<sup>in</sup>hibitor

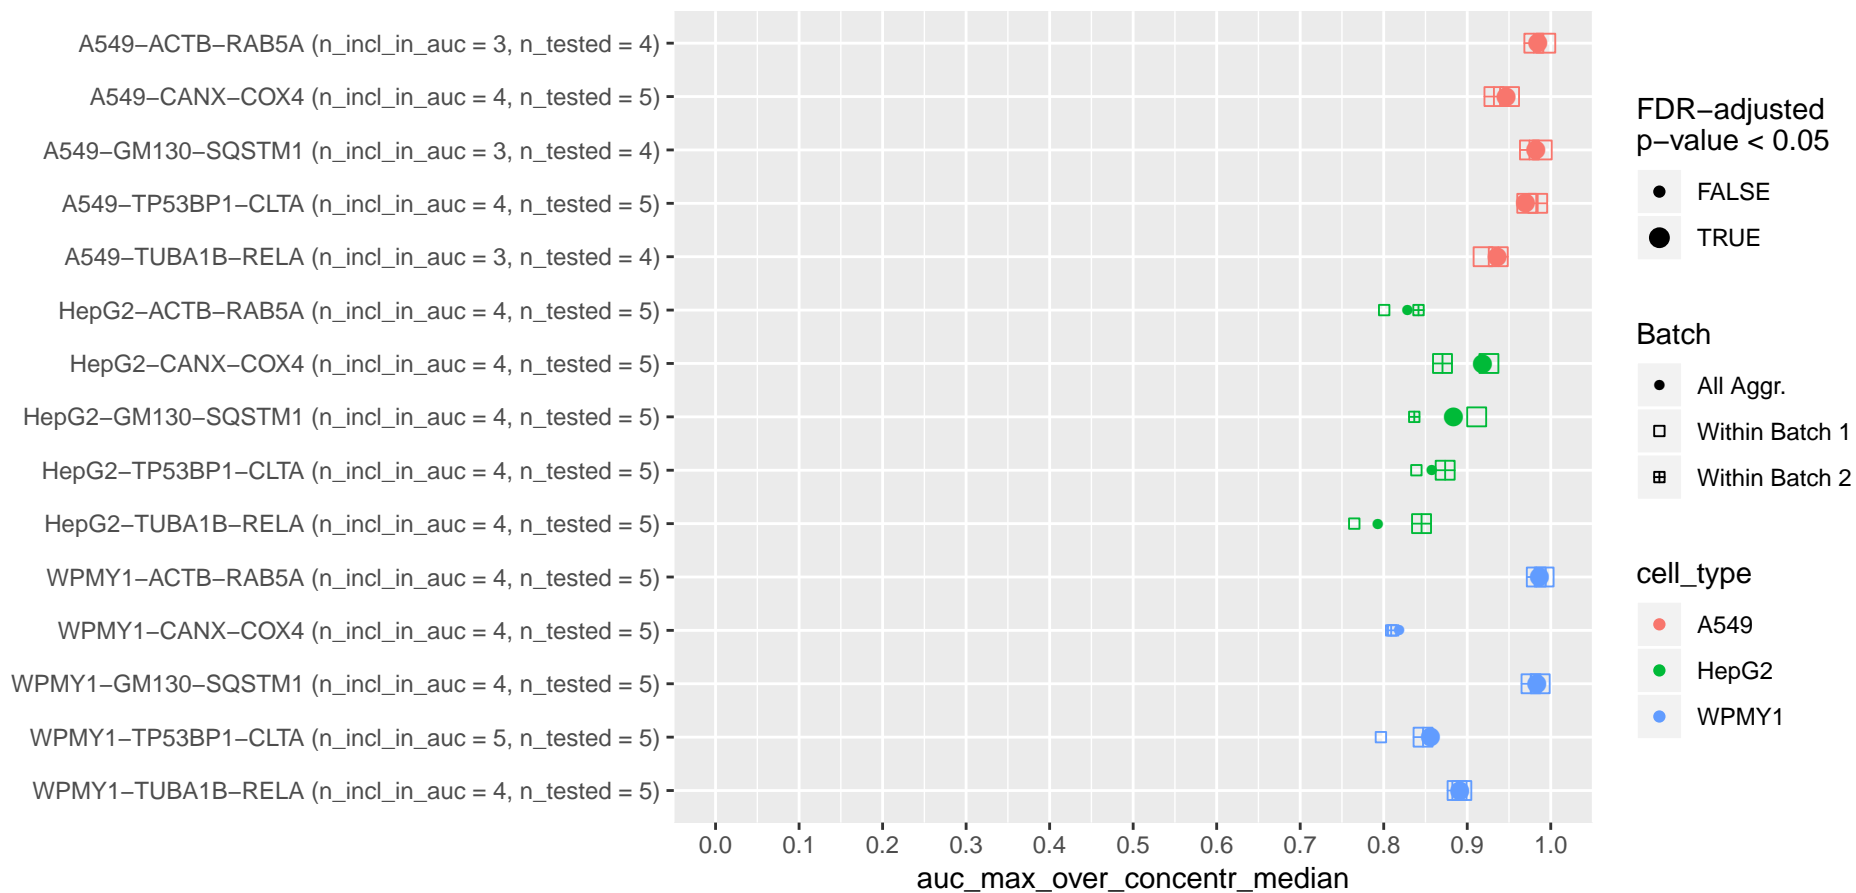

# Ubiquitin E1 ligase<sup>inhibitor</sup>

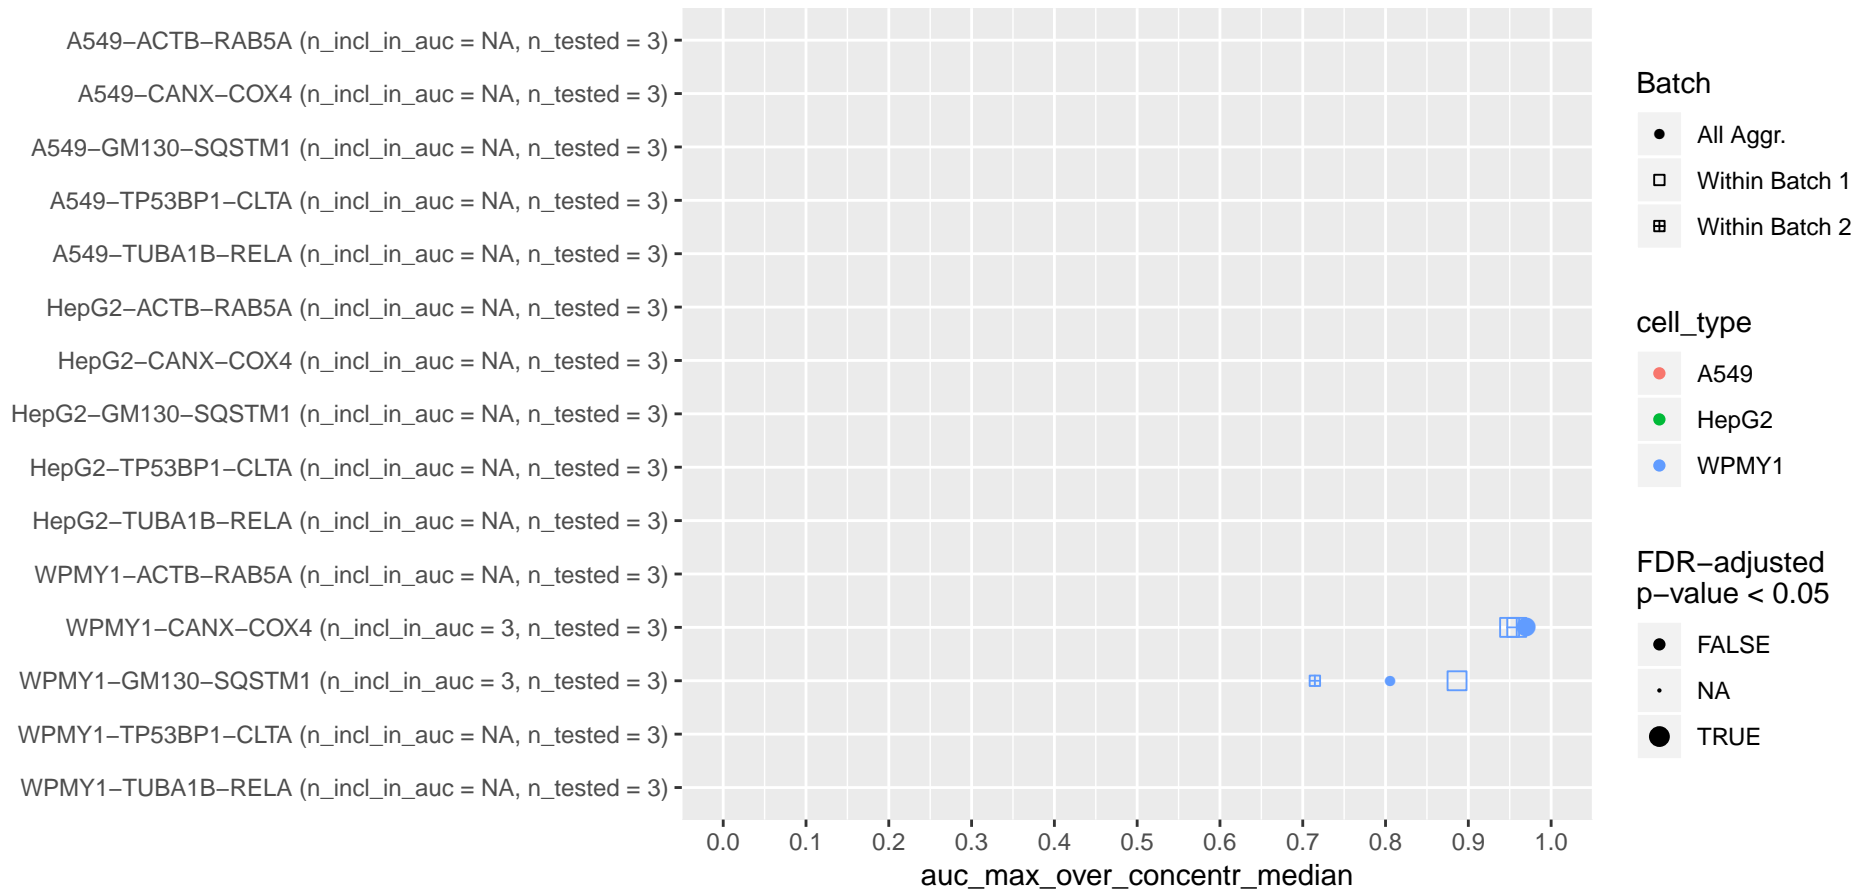

# Ubiquitin E3 ligase<sup>in</sup>hibitor

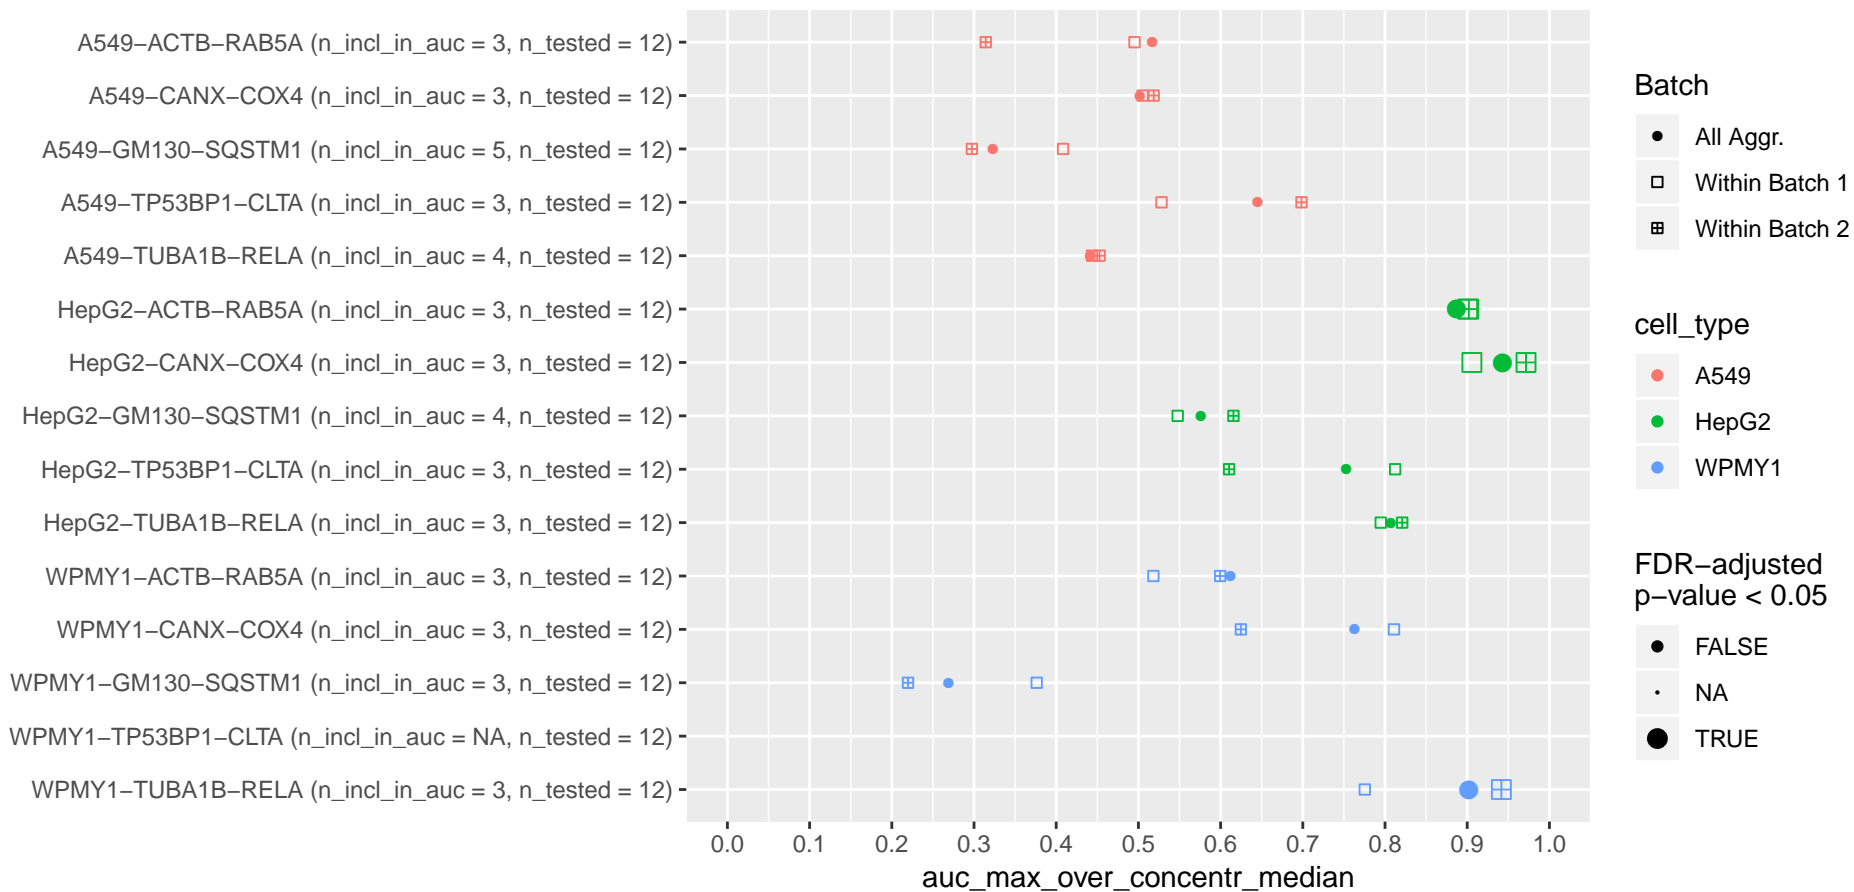

# VEGFR family^inhibitor

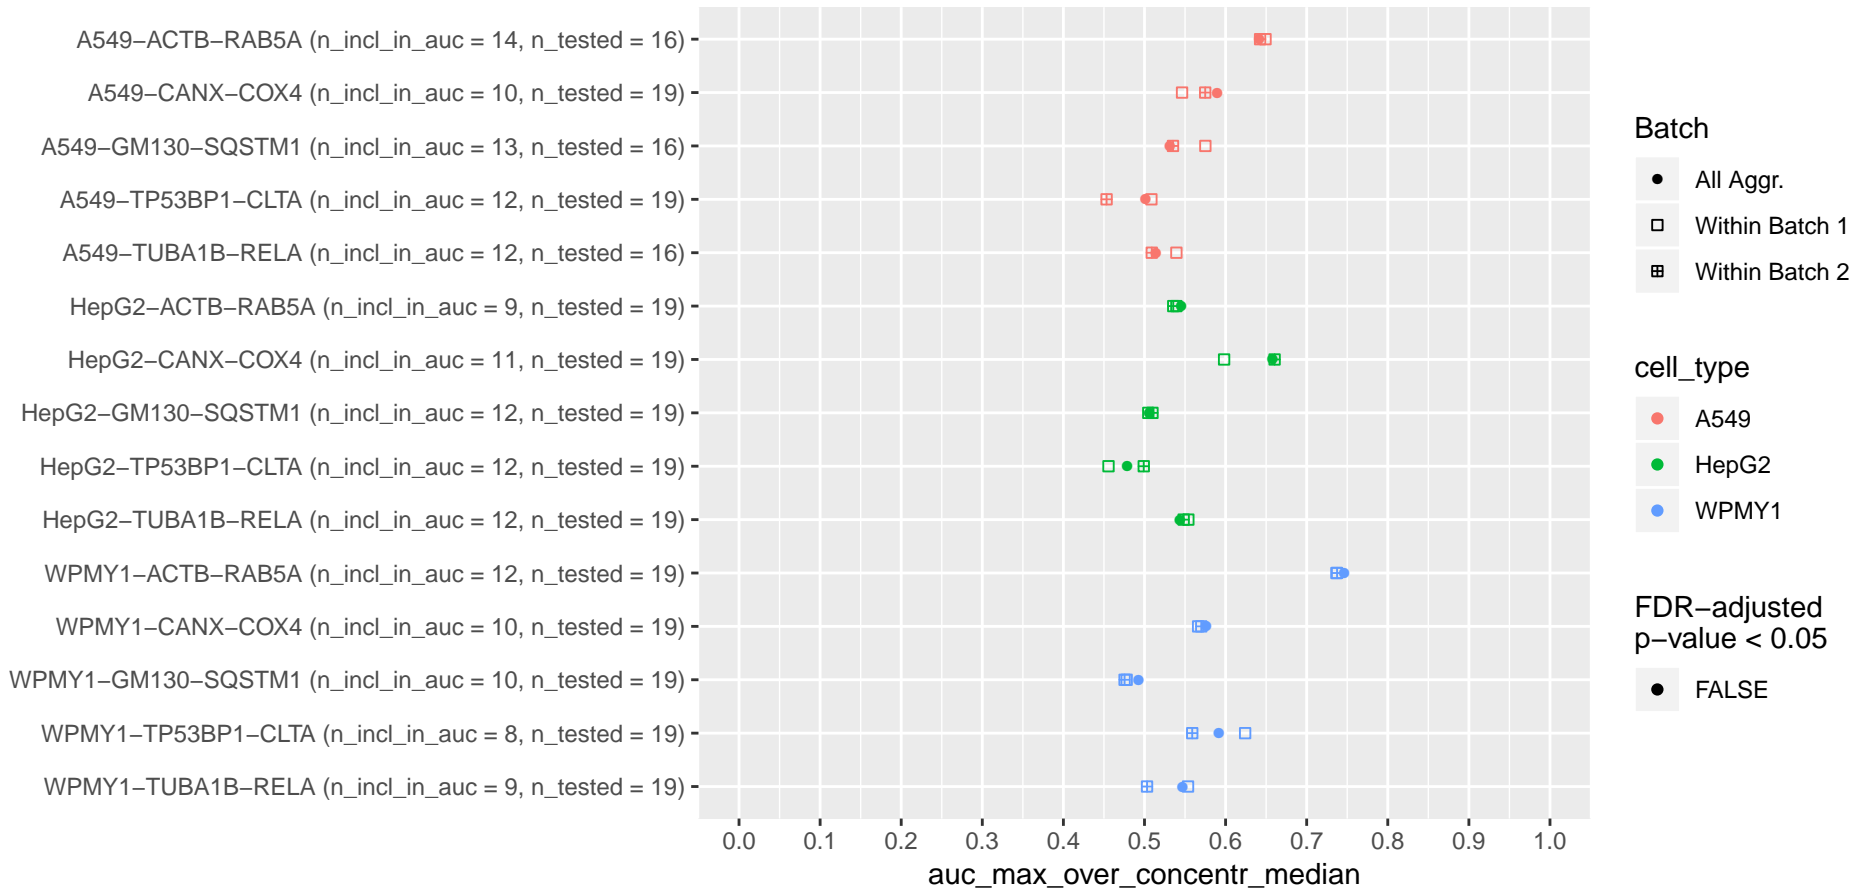

# Voltage-gated calcium channel^blocker

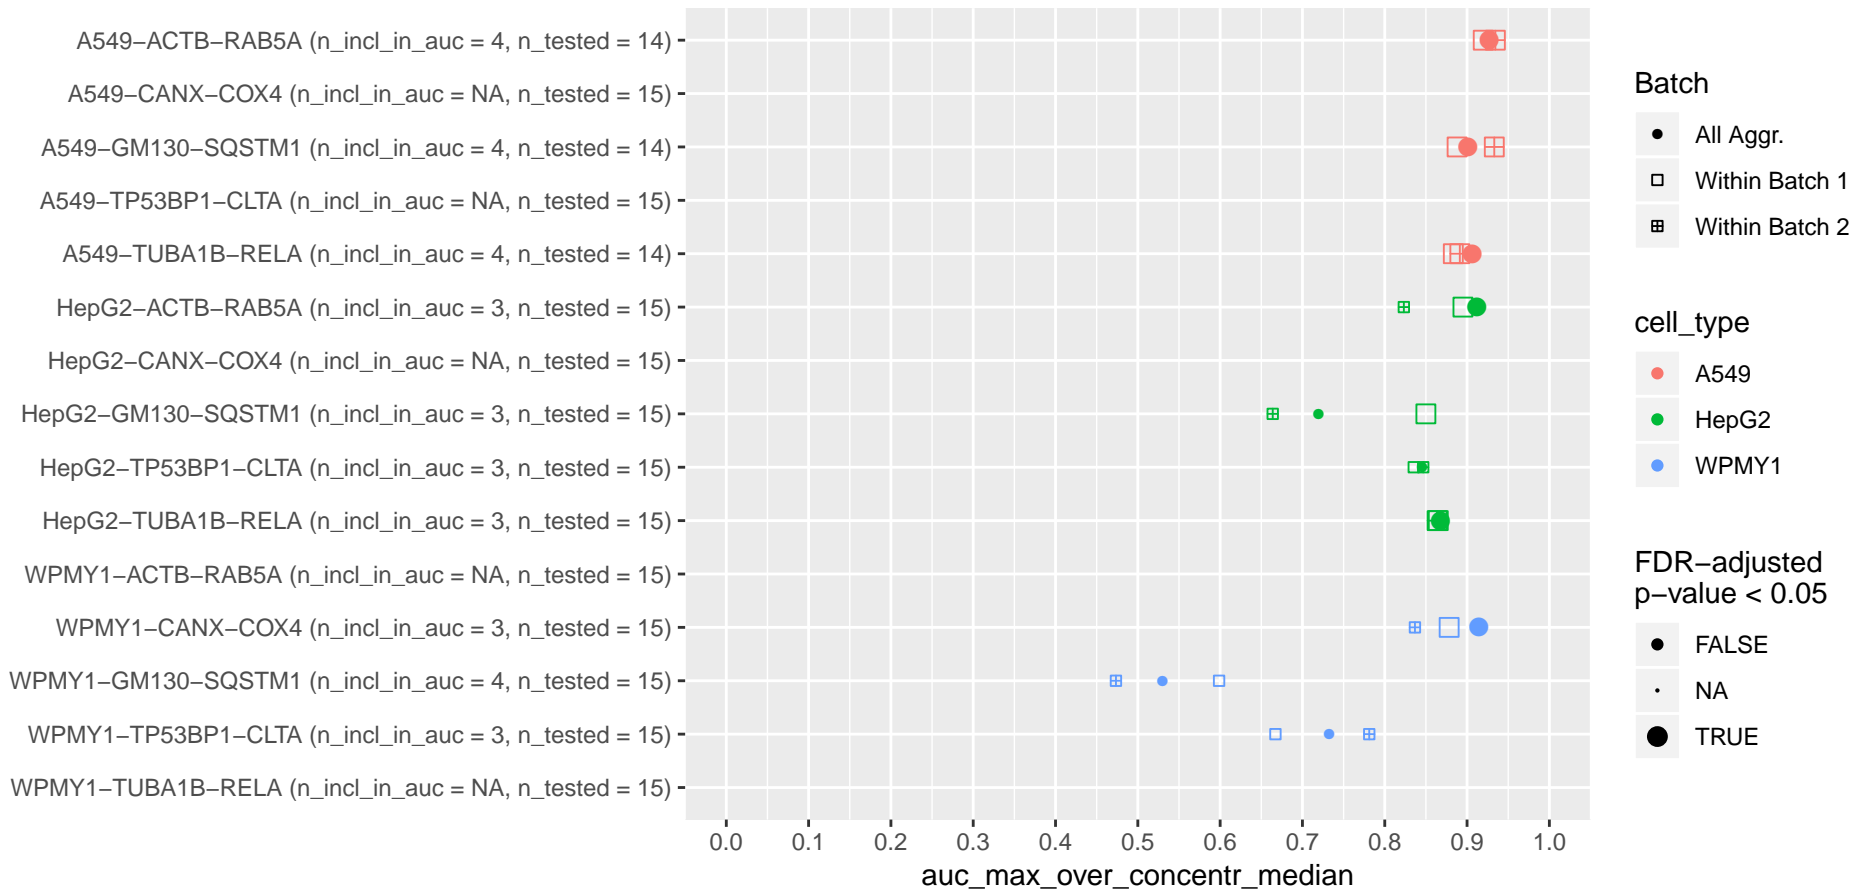

# Voltage-gated potassium channel<sup>1</sup>blocker

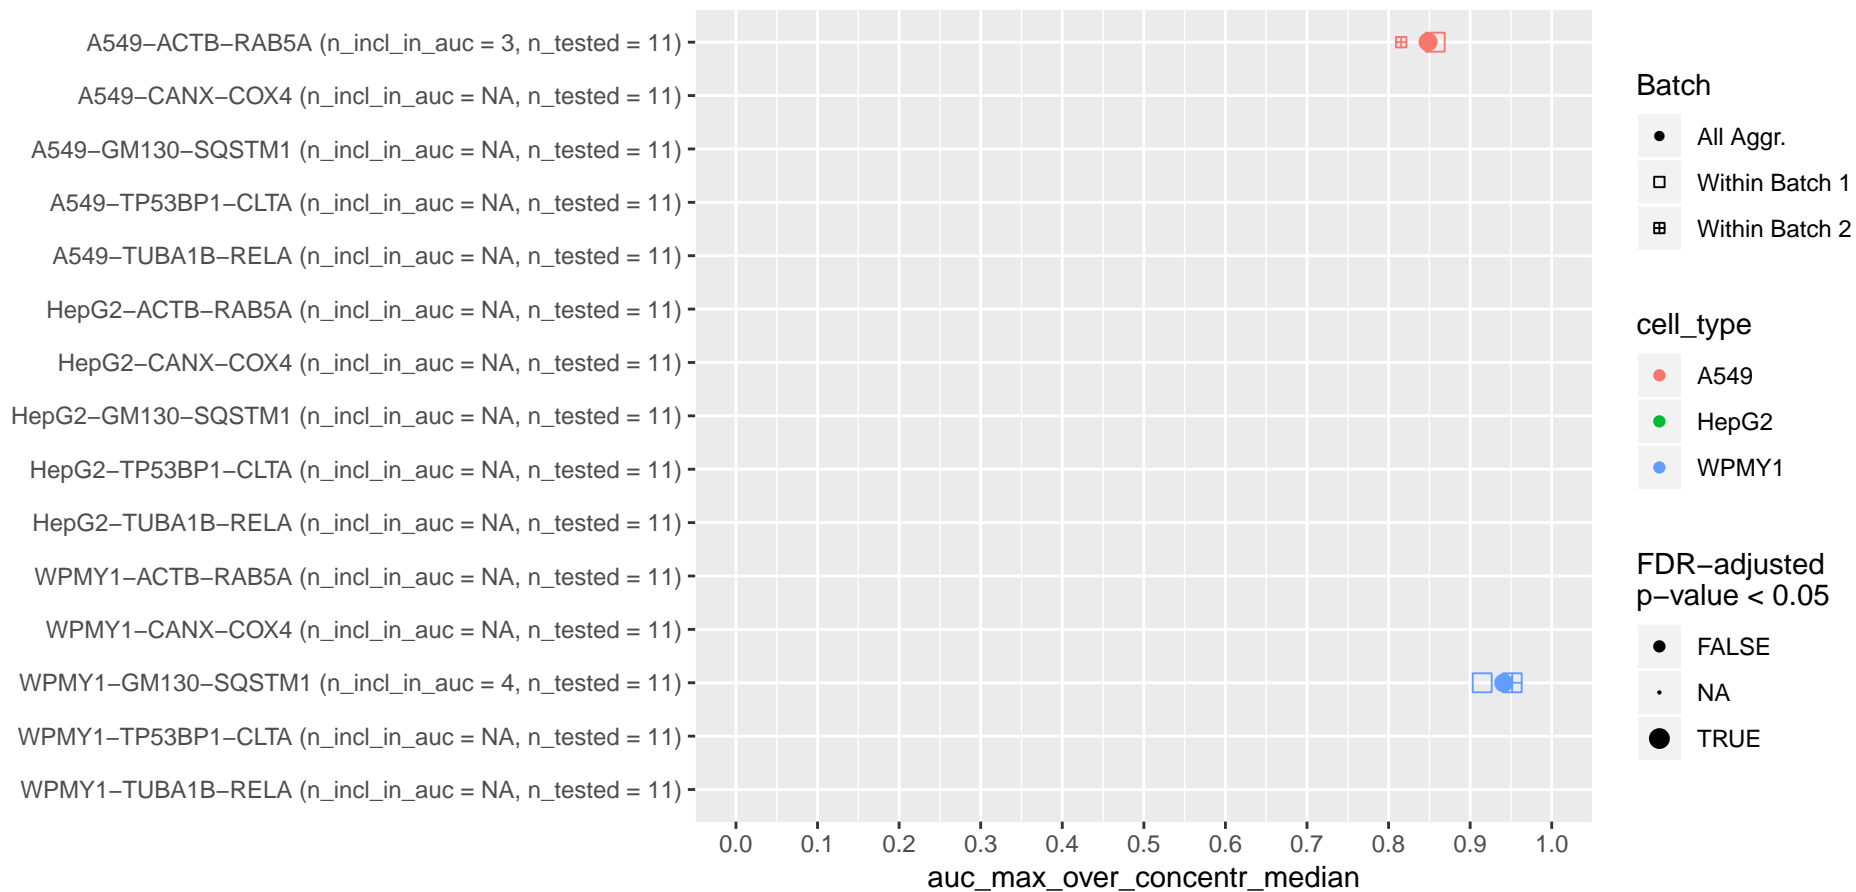

# Voltage-gated sodium channel^blocker

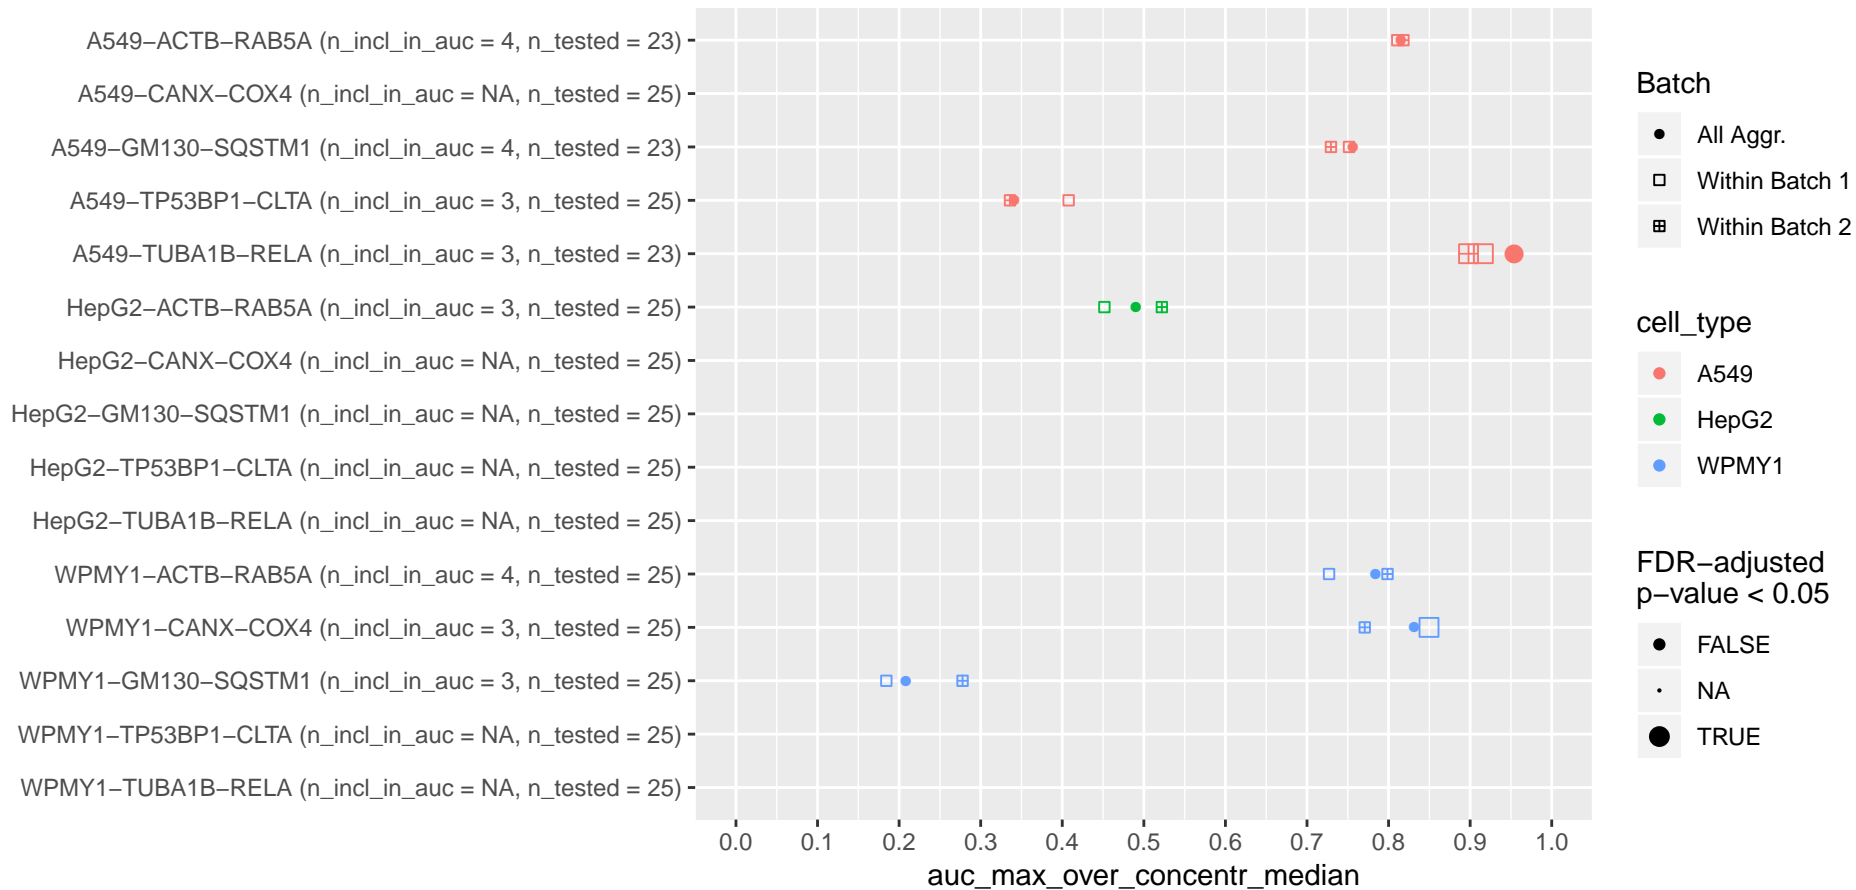

# c-Jun kinase<sup>inhibitor</sup>

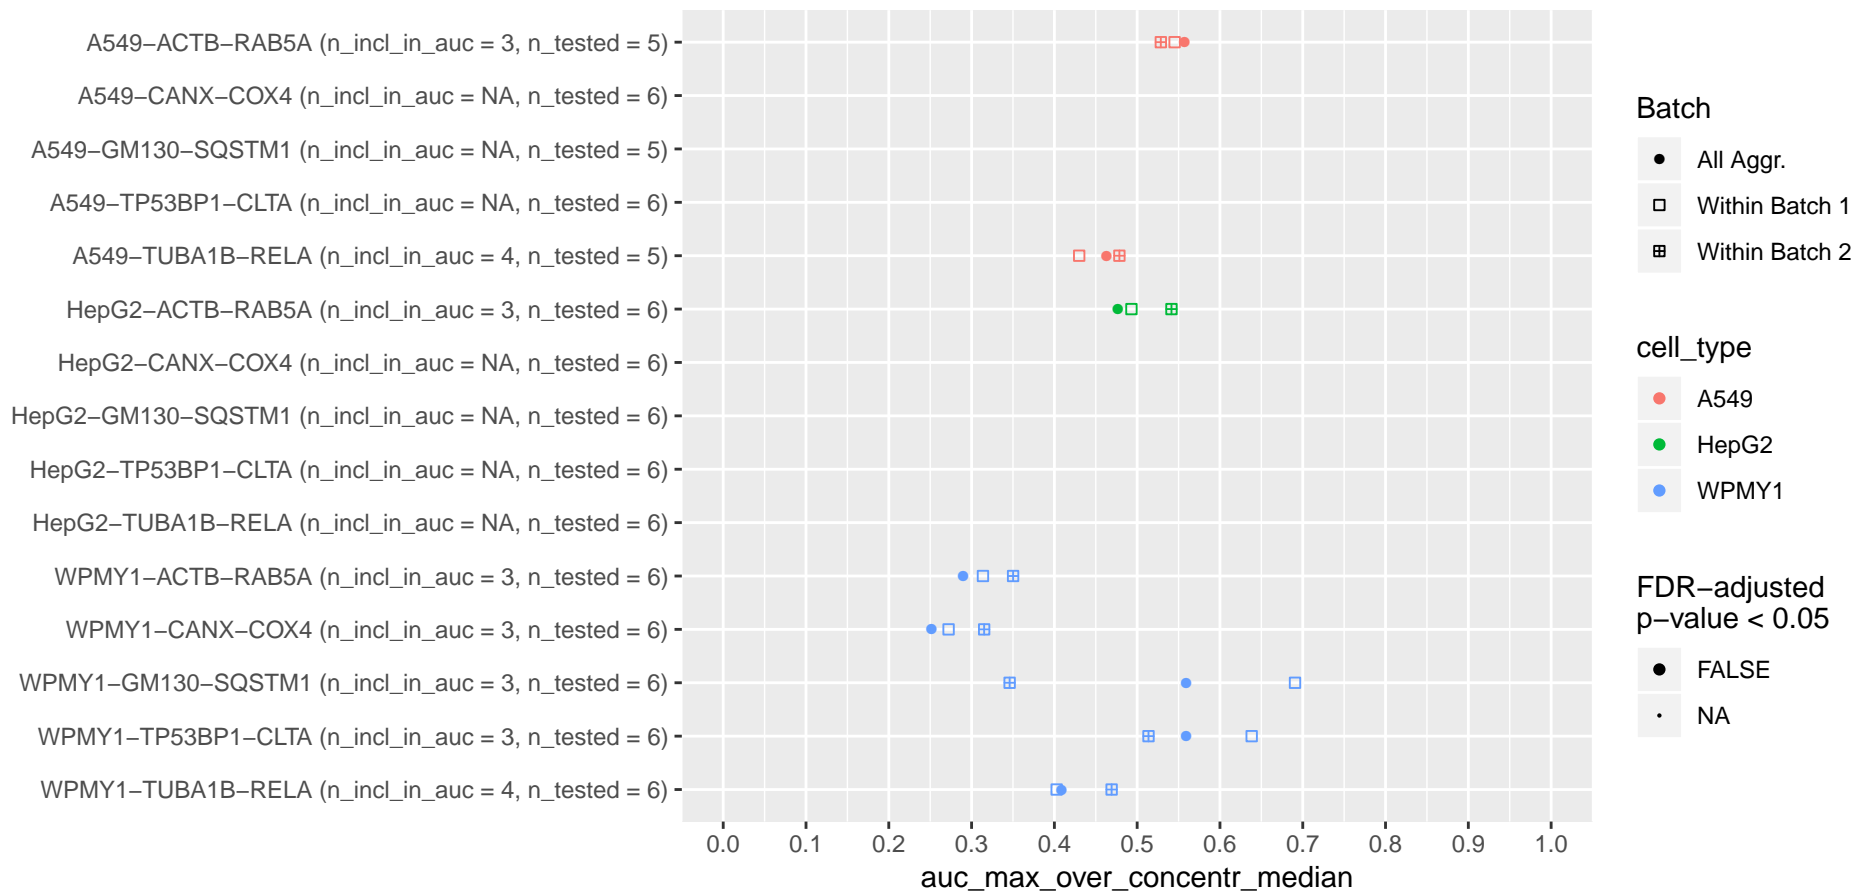



# mAChR^antagonist

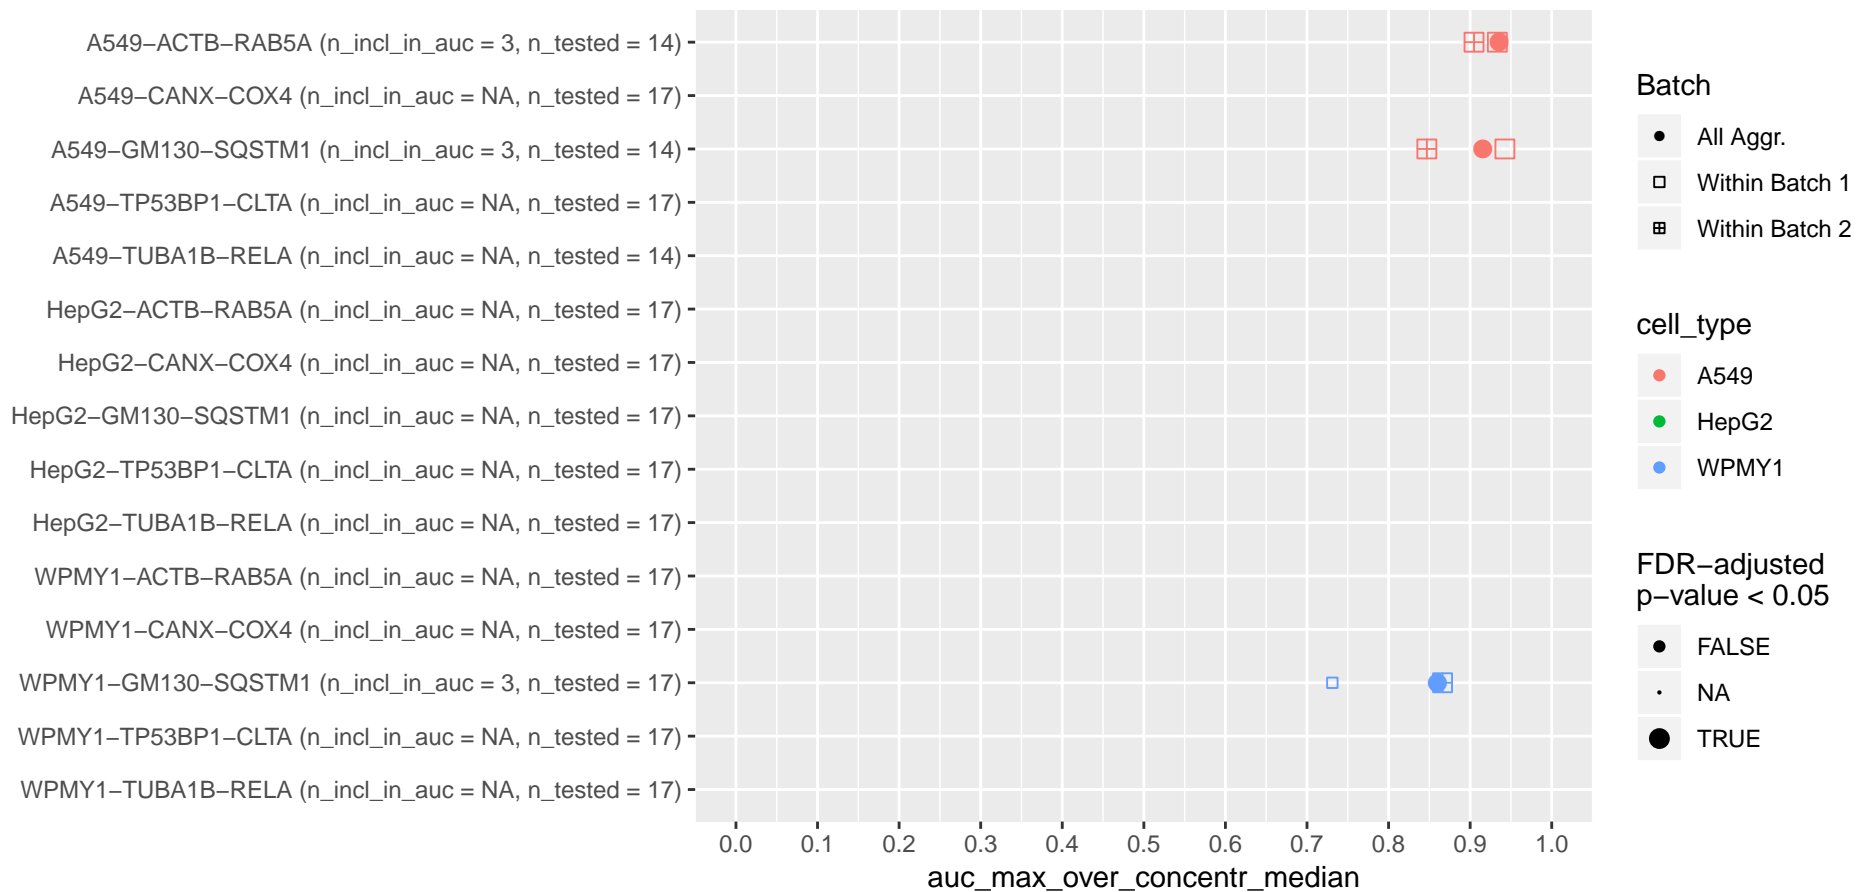

# mTOR<sup>i</sup>inhibitor

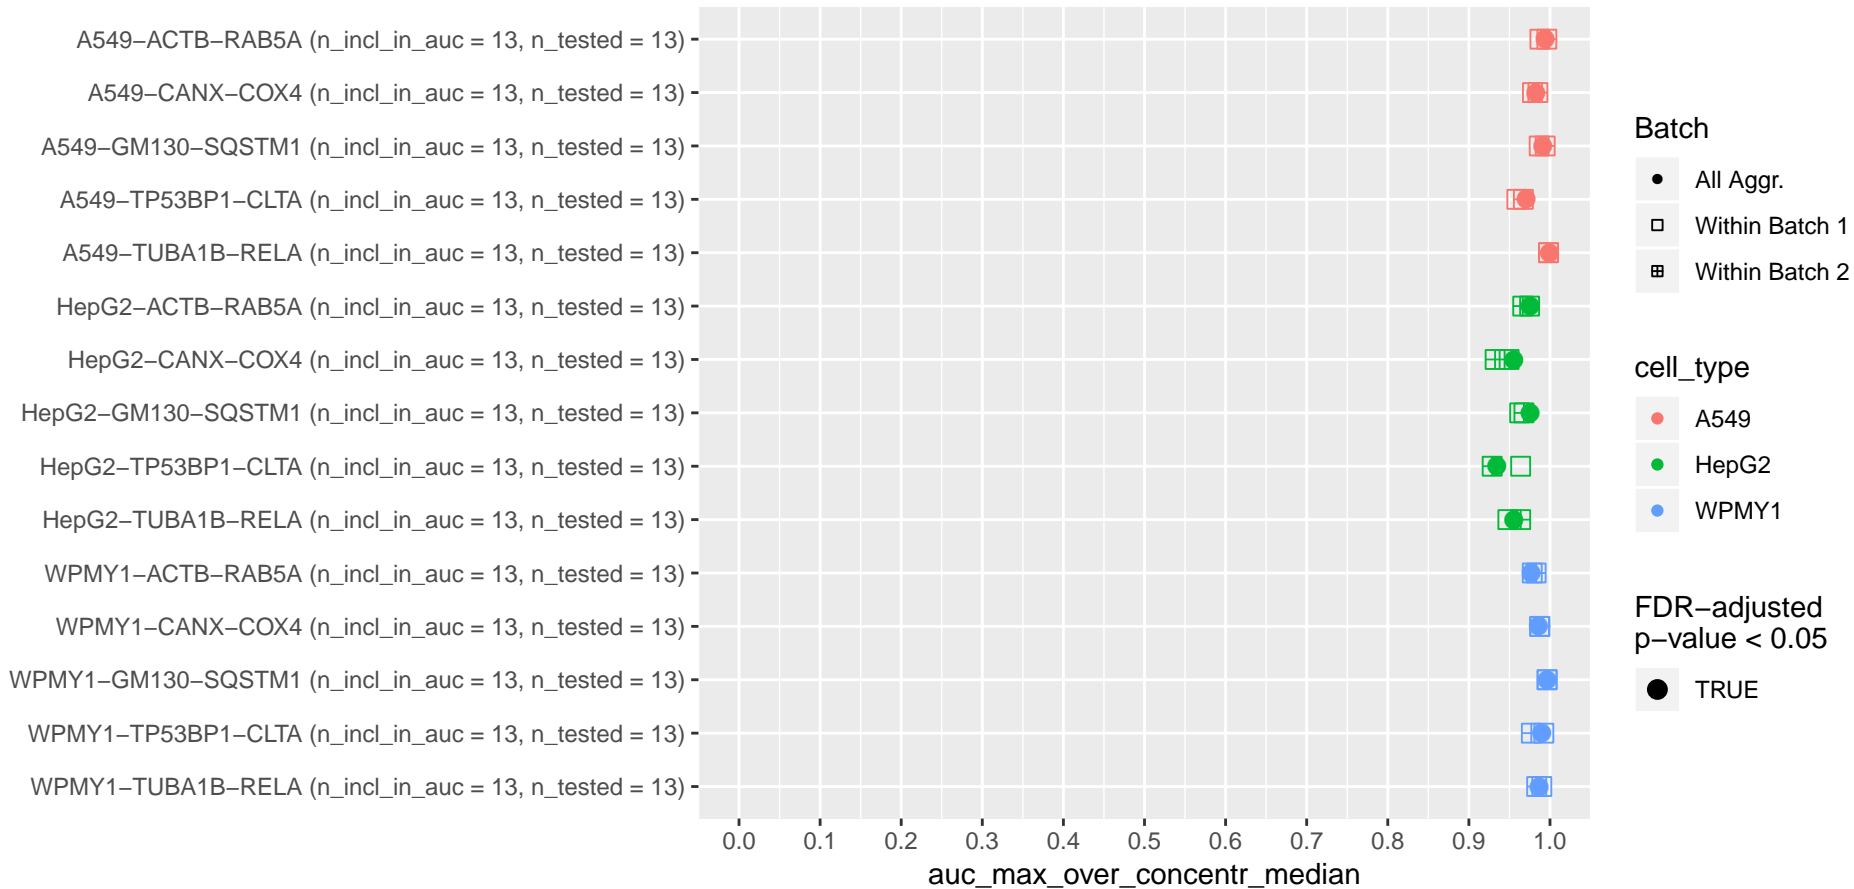

# p38 MAPK<sup>inhibitor</sup>

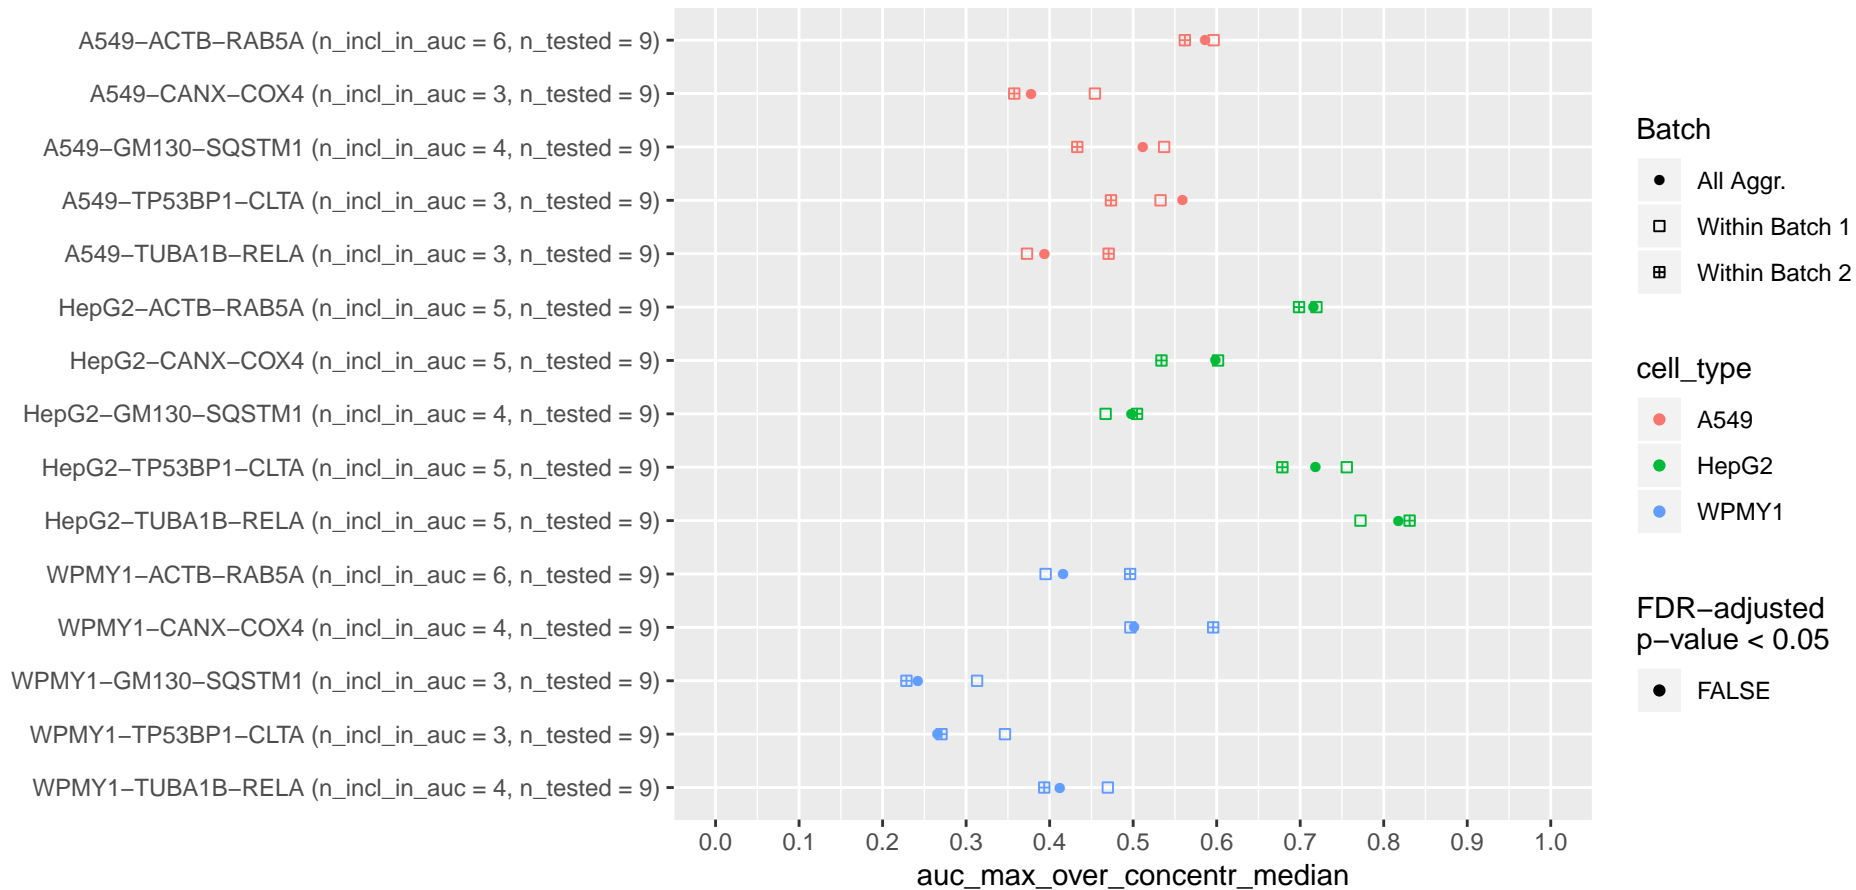

# p90 RSK<sup>inhibitor</sup>

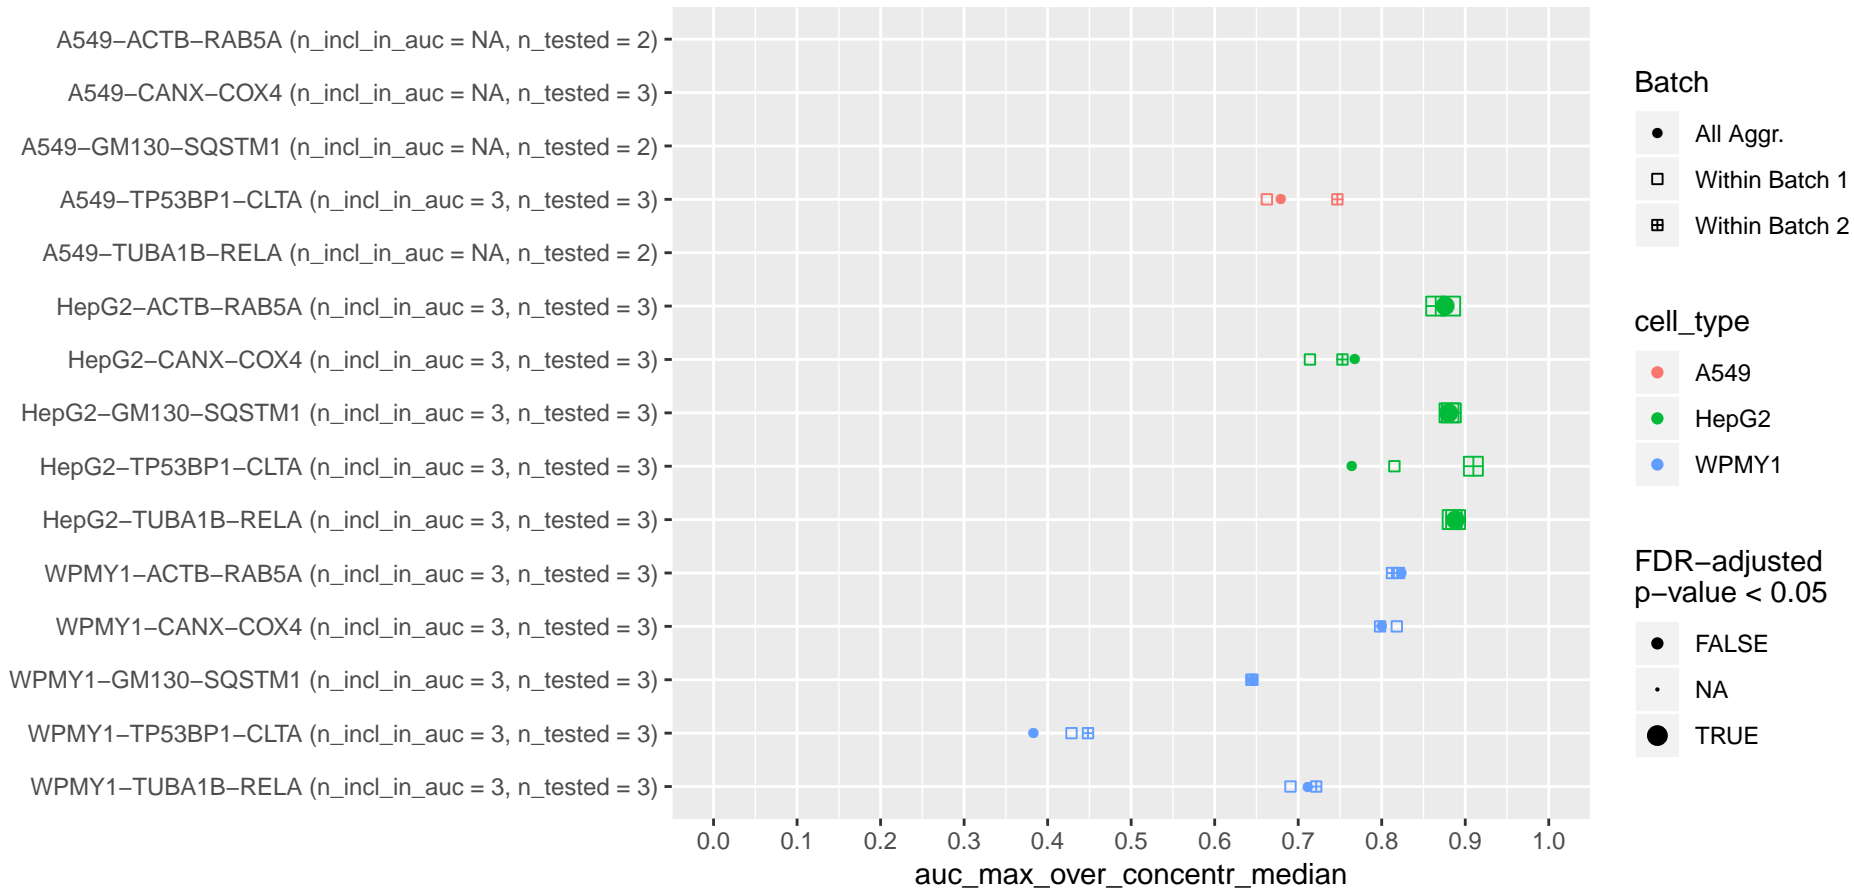

Supplement: 41598_2020_69354_MOESM3_ESM.pdf [file 41598_2020_69354_MOESM3_ESM.pdf]
